1 Journal: *eLife*

2 **Diversity-induced plant history and soil history effects**  
3 **modulate plant responses to global change**

4

5 Peter Dietrich<sup>1,2</sup>, Jens Schumacher<sup>3</sup>, Nico Eisenhauer<sup>2,4</sup>, Christiane Roscher<sup>1,2</sup>

6

7 <sup>1</sup> Department of Physiological Diversity, UFZ, Helmholtz Centre for Environmental Research,  
8 Permoserstraße 15, 04318 Leipzig, Germany

9 <sup>2</sup> German Centre of Integrative Biodiversity Research (iDiv) Halle-Jena-Leipzig, Puschstraße  
10 4, 04103 Leipzig, Germany

11 <sup>3</sup> Institute of Mathematics, Stochastics, Friedrich Schiller University Jena, Ernst-Abbe-Platz 2,  
12 07743 Jena, Germany

13 <sup>4</sup> Institute of Biology, Experimental Interaction Ecology, Leipzig University, Puschstraße 4,  
14 04103 Leipzig, Germany

15 **Abstract**

16

17 Global change has dramatic impacts on grassland diversity. However, little is known about how  
18 fast species can adapt to these changes and how this affects their responses to global change.  
19 To close this gap, we performed a common garden experiment testing whether plant responses  
20 to global change are influenced by the selection history of the plants and the conditioning  
21 history of soil at different levels of plant diversity. Therefore, we collected seeds and took soil  
22 samples from 14-year old plant communities of a biodiversity experiment. Offspring of plants  
23 from low- and high-diversity communities were either grown in their own soil or in soil of a  
24 different community, and were either exposed to drought, increased nitrogen input, or a  
25 combination of both. Results show that, under nitrogen addition, offspring of plants selected at  
26 high diversity produced more biomass than those selected at low diversity, while drought  
27 neutralized differences in biomass production. Moreover, under the influence of global change  
28 drivers, mainly soil, and to a lesser extent plant history, influenced the expression of plant traits.  
29 Our results show that plant diversity modulates plant-soil interactions and growth strategies of  
30 plants, which feedback on the eco-evolutionary pathways of the plants and thus their responses  
31 to global change.

32

33 **Key words:** plant-soil interaction, plant-soil feedback, drought, fertilization, micro-evolution,  
34 eco-evolutionary feedback, nutrient enrichment, climate change

## 35 **Introduction**

36

37 Human activities, such as the combustion of fossil fuels and the intensification of  
38 agriculture, are leading to global environmental changes, causing increased air temperatures,  
39 altered precipitation patterns, and rising amounts of nitrogen to ecosystems (IPCC, Pörtner et  
40 al. 2021). The consequences are more frequent extreme weather events such as droughts (Dai  
41 et al. 2018) and a growing accumulation of nitrogen in the soils (Holland et al. 2005). Both,  
42 drought and increased nitrogen input, in turn, further influence ecosystems and climatic  
43 conditions; hence, they are known as major global change drivers (Sage 2020).

44 Some of the most tremendous negative effects of global change are changes in  
45 ecological communities (Dornelas et al. 2014) and the extinction of species (Sage 2020),  
46 whereby plant species are particularly concerned due to their low mobility, with drastic  
47 consequences for the functioning of ecosystems. Studies in grassland biodiversity experiment  
48 have shown that low- and high-diversity plant communities significantly differ in their  
49 productivity and stability (Isbell et al. 2015; Marquard et al. 2009; Tilman et al. 2006). Low-  
50 diversity communities were shown to lose productivity over time, while high-diversity  
51 communities are more stable, so that plant diversity-productivity relationships become more  
52 positive over time (Cardinale et al. 2007; Meyer et al. 2016; Reich et al. 2012). The different  
53 development of plant-soil and plant-plant interactions at low and high diversity are assumed to  
54 be the important drivers of this strengthening biodiversity effect (Eisenhauer et al. 2019; Thakur  
55 et al. 2021). At low plant diversity, an accumulation of soil-borne pathogens might be  
56 responsible for lower plant community productivity (Mommer et al. 2018; Thakur et al. 2021),  
57 while in high-diversity communities, complementarity effects among plants inhibit such  
58 negative processes, causing a higher productivity of these plant communities (Cardinale et al.  
59 2007; Reich et al. 2012). Consequently, these findings raise the question, whether populations  
60 of the same plant species develop differently over time when growing at high or low diversity

61 due to differences in eco-evolutionary feedbacks (Bailey et al. 2006; Linhart 1988; Post and  
62 Palkovacs 2009; terHorst and Zee 2016). Indeed, there is empirical evidence that plant  
63 individuals at high diversity are selected for greater niche complementarity among species  
64 leading to a more complete use of available resources (Zuppinge-Dingley et al. 2014). At low  
65 plant diversity, however, the accumulation of soil-borne pathogens may cause persistent species  
66 to adapt to this increase by producing more defense compounds, so that over time selection  
67 favors individuals that invest more in defense and less in growth (Eisenhauer et al. 2019).

68 Taken together, low and high plant diversity may differently affect eco-evolutionary  
69 feedbacks and thus the microevolution of plants, which could have the effect that plants selected  
70 at low diversity respond differently to global change drivers than plants selected at high  
71 diversity, due to differences in the phenotype and/or growth strategies. In a previous transplant  
72 experiment (Lipowsky et al. 2011), it was shown that some of the studied grassland species  
73 showed difference in their phenotype depending on plant history (monoculture or mixture) and  
74 soil environment (home or away soil). For example, it was shown that the species *Cirsium*  
75 *oleraceum* (L.) Scop. had a higher number of leaves, when originated from mixture  
76 communities, and were taller, when grown in home soil. Furthermore, several greenhouse  
77 studies showed similar results, i.e., that plants selected at low or high diversity or grown with  
78 “own” or different soil biota vary in their productivity and trait expression (Hahl et al. 2020;  
79 van Moorsel et al. 2018b; Zuppinge-Dingley et al. 2014). Such diversity-induced differences  
80 in the phenotype could lead to different responses of plants to global change drivers. For  
81 example, it is possible that, due to differences in leaf number or root structure, plants selected  
82 at low diversity have a lower resistance against drought than plants selected at high diversity.  
83 Such changes would contribute to a faster extinction of species, which makes research into  
84 these processes an essential frontier.

85 In summary, differences in plant-plant and plant-soil interactions at low and high  
86 diversity may lead to differences in eco-evolutionary feedbacks; however, little is known about

87 how rapidly and pervasively these differences occur (terHorst and Zee 2016). Moreover, it is  
88 not known whether these differences affect the response of plants to global change drivers  
89 (Pugnaire et al. 2019), such as drought, nitrogen input or a combination of both, which is  
90 assumed to be a common scenario in the future (Craven et al. 2016; Sage 2020). To address  
91 these knowledge gaps, we performed a common garden experiment using plant and soil material  
92 from a long-running biodiversity experiment (Jena Experiment). For our study, we collected  
93 seeds of four grass species and took samples of soil biota (soil samples), which both had been  
94 selected for 14 years, either at low or high diversity (communities with two or six plant species  
95 and different plant species composition). Plants were grown either in soil inoculated with their  
96 home soil biota, i.e. soil biota of the community, where the seeds had been collected, or in soil  
97 inoculated with away soil biota, i.e. with soil biota of a different plant community (differing in  
98 plant diversity or composition). The aim of the study was to test, whether plant history (origin  
99 of plants), soil history (origin of soil biota), and soil treatment (home/away) influence the  
100 response of the plants to global change. Therefore, plants were either non-treated (control), or  
101 exposed to drought, increased nitrogen input, or a combination of both, drought and nitrogen  
102 input, in a full factorial design. We hypothesized that

103 (I) plant and soil communities develop differently at low and high diversity over time.  
104 Therefore, we expected that offspring of plants (Ia) selected at high diversity generally  
105 shows higher biomass production compared to offspring selected at low diversity in the  
106 control, and that plants under control conditions produce more biomass (Ib) in home than  
107 in away soil and (Ic) in high-diversity than in low-diversity soil. Further, (Id) we supposed  
108 effects of plant history, soil history, and soil treatment on trait expression of control  
109 plants. For example, we expected that offspring of plants from high-diversity  
110 communities show higher values for traits related to relative growth rates (e.g., leaf  
111 greenness, specific leaf area) and nutrient economy (e.g., shoot nitrogen concentrations)  
112 than offspring of plants from low-diversity communities.

113 (II) global change drivers have a strong impact on biomass production and trait expression of  
114 plants. We expected that (IIa) drought reduces, and (IIb) nitrogen input increases plant  
115 biomass, while (IIc) the combination of both global change drivers has no impact on plant  
116 biomass production, because drought and nitrogen input compensate each other's impact.  
117 (III) because of different development of plants and soil communities at low and high  
118 diversity, offspring of plants (IIIa) selected at different diversity and grown in different  
119 soil (IIIb: home vs. away soil, IIIc: soil from low- vs. high-diversity communities)  
120 respond differently to global change drivers regarding performance and trait expression.

121

## 122 **Results**

123

124 *Hypothesis 1: offspring of plants selected at different diversity and grown in different soil (high*  
125 *vs. low diversity, home vs. away) show differences in productivity and trait expression*

### 126 **Biomass production**

127 Plants grown in soil of six-species communities tended to produce more root biomass  
128 than plants in soil of two-species communities in the control (Table 3; Fig. 2). At species-level,  
129 *A. elatius* produced more root biomass and had higher root-shoot ratio, and *D. glomerata*  
130 produced more shoot and total biomass in soil of six-species than two-species communities  
131 (Fig. 2, 3a; Appendix S3: Table S8, S10). The other two species, *P. trivialis* and *A. pratensis*  
132 did not differ significantly in biomass production dependent on soil or plant history (Fig. 2, 3a;  
133 Appendix S3: Table S9, S11). Initial shoot number showed no influence on later biomass  
134 production except for shoot biomass of *D. glomerata* and root biomass of *A. elatius*, which,  
135 however, did not change the general patterns.

136

### 137 **Plant traits and pathogen infestation**

138 Legacy treatments had no consistent effects across the four species on the expression of  
139 shoot, leaf, or root traits in the control (Appendix S3: Table S1). At species-level, legacy  
140 treatments did not affect trait expression in *A. elatius* (Fig. 3a; Appendix S3: Table S1). Plants  
141 of *A. pratensis* were taller in home than in away-different soil and had thicker roots (higher root  
142 diameter) in six- than in two-species soil (Fig. 3a; Appendix S3: Table S3). Plants of *D.*  
143 *glomerata* had higher leaf greenness and stomatal conductance, when seeds originated from  
144 two-species communities (Fig. 3a; Appendix S3: Table S4). Plants of *P. trivialis* had lower  
145 shoot nitrogen concentration and root diameter, and higher SRL in home soil than in away soil  
146 (Fig. 3a; Appendix S3: Table S5).

147 We found a low pathogen infestation of *A. elatius* and *A. pratensis* ( $0.8\% \pm 1.9\%$  (SD)  
148 and  $0.1\% \pm 0.5\%$ , respectively), mainly by the rust species *Puccinia graminis* Pers. and  
149 *Puccinia coronata* Corda. Plants of *D. glomerata* and *P. trivialis*, in contrast, were strongly  
150 infested by the mildew *Blumeria graminis* (DC.) Speer ( $3.1\% \pm 4.2\%$  and  $8.6\% \pm 16.5\%$ ,  
151 respectively). Regarding legacy treatments, *D. glomerata* plants had a lower infestation when  
152 grown in home soil than in away soil, while mildew infestation of *P. trivialis* plants did not  
153 differ between legacy treatments (Fig 3a; Appendix S3: Table S6).

154

155 *Hypothesis 2: global change drivers have a strong impact on biomass production and trait*  
156 *expression.*

157 Biomass production

158 Overall, global change drivers had a strong impact on almost all response variables  
159 (Table 2; Fig. 3b-d; Appendix S2: Table S1-9). Compared to control plants, drought reduced  
160 shoot biomass production, which was found across all study species and at species-level (Fig.  
161 4a, d). In contrast, drought did not have consistent effects on root biomass (Fig. 4a, d). Drought  
162 had positive impact on root biomass of *A. elatius* and *D. glomerata*, while root biomass of *A.*  
163 *pratensis* decreased under drought and did not change significantly in *P. trivialis* (Fig. 4d).

164 Total biomass production was decreased, when plants were exposed to drought (Fig. 4a, d)  
165 except for *D. glomerata*, where it was not different from the control (Fig. 4d). Root-shoot ratios  
166 increased under drought (Fig. 4a, d), which was found for all species except for *P. trivialis* (no  
167 significant change; Fig. 4d).

168 Nitrogen input increased shoot, root, and thus also total biomass across the four species  
169 (Fig. 4b) as well as in separate analyses of *A. elatius* and *A. pratensis* (Fig. 4e). Plants of *D.*  
170 *glomerata* and *P. trivialis* did not change in root biomass when fertilized (Fig. 3e). Nitrogen  
171 input caused a decrease in root-shoot ratio in all species (Fig. 4a, e).

172 When plants were treated with both global change drivers in combination, the negative  
173 impact of drought on shoot biomass was cancelled out by the positive impact of nitrogen input  
174 leading to an overall slight increase of shoot biomass (compared to control plants) that was also  
175 significant at the species-level except for *A. elatius* (Fig. 4c, f). Consistent with this, the positive  
176 impact of nitrogen input on root biomass was also cancelled out by drought when plants were  
177 treated with both global change drivers, i.e. control plants and plants treated with both global  
178 change drivers did not differ in root biomass production, across all study species (Fig. 4c). At  
179 species-level, the combination of both global change drivers had an additive effect on root  
180 biomass production of *A. elatius* and *D. glomerata*, i.e. plants of both species showed highest  
181 root biomass when treated with both global change drivers (Fig. 4f). In *A. pratensis* and *P.*  
182 *trivialis*, both global change drivers in combination decreased root biomass production (Fig.  
183 3f). Taken together, the combination of both global change drivers led to a slight increase in  
184 total biomass production, across all study species and for the high-productive species *A. elatius*  
185 and *D. glomerata*, while plants of the low-productive species *A. pratensis* and *P. trivialis* had a  
186 similar total biomass production as in the control (Fig. 4c, f). Root-shoot ratios were as low as  
187 in fertilized plants, across all species and in *P. trivialis* (Fig. 4c, f). Plants of *A. elatius* and *D.*  
188 *glomerata* increased root-shoot ratios, similar to plants under drought (Fig. 4f). In contrast, *A.*



189 *pratensis* strongly decreased root-shoot ratios resulting in the lowest values compared to the  
190 other treatments (Fig. 4f).

191

## 192 Plant traits and pathogen infestation

193         Across all study species, drought did not significantly alter growth height, but nitrogen  
194 input increased height (Appendix S2: Fig. S1). When treated with both global change drivers,  
195 drought canceled out the positive nitrogen input effect, leading to similar height of plants treated  
196 with both global change drivers and control plants. Further, drought and nitrogen input  
197 increased shoot nitrogen concentrations and leaf greenness, with additive effects when both  
198 global change drivers were applied together (Appendix S2: Fig. S1). Drought did not influence  
199 LDMC and SLA, while nitrogen input decreased LDMC and increased SLA (Appendix S2:  
200 Fig. S2). When treated with both global change drivers, drought mitigated the decrease of  
201 LDMC under nitrogen input, while the increase of SLA under nitrogen input did not change  
202 with drought (Appendix S2: Fig. S2). Stomatal conductance was increased, when plants were  
203 treated with drought, but did not change when fertilized irrespective of the drought treatment  
204 (Appendix S2: Fig. S2). In terms of root traits, we found a decrease of RLD under drought  
205 (irrespective of fertilization) and an increase in root diameter under nitrogen input (irrespective  
206 of drought; Appendix S2: Fig. S3). Results of species-specific trait expression changes under  
207 global change drivers can be found in Figure 3b-d and Appendix S2.

208         In *D. glomerata*, mildew infestation remained unchanged when treated with drought,  
209 but increased with nitrogen input. When treated with both global change drivers, mildew  
210 infestation was as high as in fertilized plants (Fig. 3b-d; Appendix S2: Fig. S4). In *P. trivialis*,  
211 mildew infestation was increased under drought and when fertilized, while the combination of  
212 both global change drivers led to the highest mildew infestation (Fig. 3b-d; Appendix S2: Fig.  
213 S4).

214

215 *Hypothesis 3: offspring of plants selected at different diversity and grown in different soil (high*  
216 *vs. low diversity, home vs. away) respond differently to global change drivers*

### 217 Biomass production

218 Plants from two- and six-species communities did not differ in shoot biomass production  
219 when treated with drought, but plants from six-species communities treated with drought tended  
220 to produce more root biomass than plants from two-species communities across all study  
221 species (Table 3; Fig. 5a, d, g). At species-level, we found no significant effects of legacy  
222 treatments under drought (Fig. 3b; Appendix S3: Table S8-S11).

223 When plants were fertilized, we found an impact of plant history across all study species:  
224 fertilized plants originated from six-species communities had a higher root and total biomass  
225 production than plants from two-species communities (Table 3; Fig. 5a, g). This was also found  
226 in *D. glomerata* plants, which tended to produce more shoot and total biomass when originated  
227 from six-species communities (Fig. 3c; Appendix S3: Table S10). In *A. elatius*, total biomass  
228 production of fertilized plants was significantly higher (and shoot biomass marginally  
229 significantly higher), when plants were grown in home and away-same than in away-different  
230 soil (Fig. 3c; Appendix S3: Table S8). In *A. pratensis*, fertilized plants grown in two-species  
231 community soil tended to produce more total biomass than in six-species community soil (Fig.  
232 3c; Appendix S3: Table S9), while fertilized *P. trivialis* showed no significant differences (Fig.  
233 3c; Appendix S3: Table S11).

234 When plants were treated with both global change drivers, the effects of nitrogen input  
235 were cancelled out or changed by drought, i.e. there was no significant impact of legacy  
236 treatments on biomass production across all study species and for *A. elatius* (Table 3; Fig. 3d;  
237 Appendix S3: Table S8). In *D. glomerata*, the significant influence of plant history disappeared,  
238 but plants in home and away-different soil showed higher root-shoot ratios than plants in away-  
239 same soil (Fig. 3d; Appendix S3: Table S10). Plants of *P. trivialis* treated with both global  
240 change drivers tended to have higher root biomass and root-shoot ratios when grown in home

241 than in away-same soil (Fig. 3d; Appendix S3: Table S11). In contrast to the overall trend, *A.*  
242 *pratensis* was the only species which showed a similar response to nitrogen input and treatment  
243 with both global change drivers: the biomass production was higher in two- than in six-species  
244 community soil (for both global change drivers: significant higher root biomass and root-shoot  
245 ratios; Fig. 3d; Appendix S3: Table S9).

246

247 Plant traits and pathogen infestation

248 Shoot nitrogen concentration was not influenced by plant or soil history when treated  
249 with drought, but fertilized plants in six-species soil had higher shoot nitrogen concentrations  
250 than in two-species soil (soil history effect; Appendix S3: Table S1; Fig. S1). Moreover,  
251 fertilized plants had lower shoot nitrogen concentrations in home than in away-different soil  
252 (soil treatment effect; Appendix S3: Table S1; Fig. S1). When plants were treated with both  
253 global change drivers, the nitrogen input effect on soil history was cancelled out by drought,  
254 while the impact of soil treatment did not: plants in home soil still had lower shoot nitrogen  
255 concentration than plants in away soil (Appendix S3: Table S1; Fig. S1). Other plant traits  
256 (growth height, leaf greenness, LDMC, SLA, stomatal conductance, root traits) did not  
257 significantly differ depending on legacy treatments when plants were treated with nitrogen or  
258 drought (Appendix S3: Table S1). At species level, we found a large number of different  
259 responses depending on legacy treatments and type of global change driver, which can be found  
260 in Figure 3b-d and Appendix S3.

261 Mildew infestation of *D. glomerata* plants exposed to drought was higher in home than  
262 in away soil, while this drought effect was cancelled out by nitrogen input (Appendix S3: Table  
263 S6). Mildew infestation of *P. trivialis* plants was not significantly influenced by legacy  
264 treatments, neither with nor without global change drivers (Appendix S3: Table S6).

265

266 **Tables**

267

268 **Table 1** Summary list of response variables and experimental factors of the common garden

269 experiment

| Variable                        | Abbreviation       | Unit                          | Description                                                                                                                                                                                                                                             |
|---------------------------------|--------------------|-------------------------------|---------------------------------------------------------------------------------------------------------------------------------------------------------------------------------------------------------------------------------------------------------|
| <b>Response variables</b>       |                    |                               |                                                                                                                                                                                                                                                         |
| Biomass production              |                    |                               |                                                                                                                                                                                                                                                         |
| Total biomass                   | Total Bm           | $g_{total}$                   | Shoot and root biomass per pot                                                                                                                                                                                                                          |
| Shoot mass                      | Shoot Bm           | $g_{shoot}$                   | Shoot biomass per pot                                                                                                                                                                                                                                   |
| Root mass                       | Root Bm            | $g_{root}$                    | Root biomass per pot                                                                                                                                                                                                                                    |
| Root-shoot ratio                | -                  | $g_{root} g_{shoot}^{-1}$     | Root biomass divided by shoot biomass per pot                                                                                                                                                                                                           |
| Aboveground traits              |                    |                               |                                                                                                                                                                                                                                                         |
| Growth height                   | -                  | cm                            | Stretched shoot length of longest vegetative shoot <sup>a</sup>                                                                                                                                                                                         |
| Shoot nitrogen concentration    | $N_{Shoot}$        | $mg\ N\ g_{shoot}^{-1}$       | Nitrogen mass per dry shoot mass                                                                                                                                                                                                                        |
| Leaf greenness                  | -                  | -                             | Unitless estimate of leaf chlorophyll concentration <sup>a</sup>                                                                                                                                                                                        |
| Specific leaf area              | SLA                | $mm_{leaf}^2\ mg_{leaf}^{-1}$ | Leaf area per dry leaf mass <sup>a</sup>                                                                                                                                                                                                                |
| Leaf dry matter content         | LDMC               | $mg_{leaf}\ g_{leaf}^{-1}$    | Dry leaf mass per water-saturated fresh leaf mass <sup>a</sup>                                                                                                                                                                                          |
| Stomatal conductance            | $g_s$              | $mmol\ m^{-2}\ s^{-1}$        | Stomatal conductance per leaf area <sup>a</sup>                                                                                                                                                                                                         |
| Belowground traits              |                    |                               |                                                                                                                                                                                                                                                         |
| Root diameter                   | Dia                | mm                            | Average root diameter of the root subsample                                                                                                                                                                                                             |
| Specific root length            | SRL                | $m_{root}\ g_{root}^{-1}$     | Root length per dry root biomass (subsample)                                                                                                                                                                                                            |
| Root length density             | RLD                | $cm_{root}\ cm_{soil}^{-3}$   | Root length (extrapolated) per soil volume (pot)                                                                                                                                                                                                        |
| Pathogen infestation            | -                  | %                             | Percentage of infested leaf area (estimated) <sup>a</sup>                                                                                                                                                                                               |
| <b>Experimental factors</b>     |                    |                               |                                                                                                                                                                                                                                                         |
| Species identity                | Species ID         | -                             | Study species                                                                                                                                                                                                                                           |
| Legacy treatments               |                    |                               |                                                                                                                                                                                                                                                         |
| Plant history                   | PH                 | -                             | Species richness of the plant community, where the seeds were collected – two or six plant species                                                                                                                                                      |
| Soil history                    | SH                 | -                             | Species richness of plant community, where the soil for inoculation was taken – two or six plant species                                                                                                                                                |
| Soil treatment                  | ST                 | -                             | Origin of seed and soil in one pot:<br>- same plot origin = home soil treatment<br>- different plot origin, but same species richness = away-same soil treatment<br>- different plot origin, different species richness = away-different soil treatment |
| Global change driver treatments |                    |                               |                                                                                                                                                                                                                                                         |
| Drought treatment               | Drought / D        | -                             | 30% instead of 60% water saturation                                                                                                                                                                                                                     |
| Nitrogen input treatment        | Nitrogen input / N | -                             | Fertilization with $NH_3NO_4$ (8x 95 mg)                                                                                                                                                                                                                |

270

<sup>a</sup>averaged per pot

271

272

273 **Table 2** Summary of mixed-effect model analyses testing the effects of species identity (N = 4),  
 274 legacy treatments (plant history, soil history, soil treatment), global change treatments (drought,  
 275 nitrogen input), and their interactions on plant performance (total biomass, shoot biomass, root  
 276 biomass). Shown are degrees of freedom (Df), Chi<sup>2</sup> and P-values (P). Significant effects (P <  
 277 0.05) are given in bold, marginally significant effects (P < 0.1) in italics.

|                                     | Total biomass |                  |                  | Shoot biomass |                  |                  | Root biomass |                  |                  |
|-------------------------------------|---------------|------------------|------------------|---------------|------------------|------------------|--------------|------------------|------------------|
|                                     | Df            | Chi <sup>2</sup> | P                | Df            | Chi <sup>2</sup> | P                | Df           | Chi <sup>2</sup> | P                |
| Species identity (ID)               | 3             | 73.25            | <b>&lt;0.001</b> | 3             | 80.17            | <b>&lt;0.001</b> | 3            | 121.30           | <b>&lt;0.001</b> |
| Plant history                       | 1             | 3.48             | <i>0.062</i>     | 1             | 1.36             | 0.244            | 1            | 3.40             | <i>0.065</i>     |
| Soil history                        | 1             | 0.01             | 0.915            | 1             | 0.04             | 0.851            | 1            | 0.49             | 0.484            |
| Soil treatment                      | 2             | 2.17             | 0.338            | 2             | 1.20             | 0.548            | 2            | 3.66             | 0.161            |
| Drought (D)                         | 1             | 83.05            | <b>&lt;0.001</b> | 1             | 110.26           | <b>&lt;0.001</b> | 1            | 2.81             | <i>0.094</i>     |
| Nitrogen input (N)                  | 1             | 257.26           | <b>&lt;0.001</b> | 1             | 425.93           | <b>&lt;0.001</b> | 1            | 15.89            | <b>&lt;0.001</b> |
| Species ID x Plant history          | 3             | 0.71             | 0.872            | 3             | 1.77             | 0.621            | 3            | 0.63             | 0.890            |
| Species ID x Soil history           | 3             | 1.68             | 0.642            | 3             | 0.18             | 0.980            | 3            | 3.64             | 0.303            |
| Species ID x Soil treatment         | 6             | 4.29             | 0.638            | 6             | 6.64             | 0.355            | 6            | 2.30             | 0.891            |
| Species ID x D                      | 3             | 52.00            | <b>&lt;0.001</b> | 3             | 43.11            | <b>&lt;0.001</b> | 3            | 98.61            | <b>&lt;0.001</b> |
| Species ID x N                      | 3             | 30.46            | <b>&lt;0.001</b> | 3             | 33.73            | <b>&lt;0.001</b> | 3            | 18.28            | <b>&lt;0.001</b> |
| D x N                               | 1             | 35.27            | <b>&lt;0.001</b> | 1             | 27.47            | <b>&lt;0.001</b> | 1            | 10.90            | <b>0.001</b>     |
| Species ID x Plant history x D      | 4             | 0.92             | 0.922            | 4             | 4.42             | 0.353            | 4            | 0.72             | 0.948            |
| Species ID x Soil history x D       | 4             | 1.17             | 0.883            | 4             | 5.33             | 0.255            | 4            | 0.54             | 0.969            |
| Species ID x Soil treatment x D     | 8             | 2.81             | 0.946            | 8             | 4.78             | 0.781            | 8            | 3.30             | 0.914            |
| Species ID x Plant history x N      | 4             | 2.66             | 0.617            | 4             | 5.75             | 0.219            | 4            | 1.69             | 0.792            |
| Species ID x Soil history x N       | 4             | 6.59             | 0.159            | 4             | 3.47             | 0.482            | 4            | 5.26             | 0.262            |
| Species ID x Soil treatment x N     | 8             | 9.35             | 0.314            | 8             | 4.62             | 0.797            | 8            | 15.48            | <i>0.050</i>     |
| Species ID x Plant history x D x N  | 4             | 14.85            | <b>0.005</b>     | 4             | 27.25            | <b>&lt;0.001</b> | 4            | 12.61            | <b>0.013</b>     |
| Species ID x Soil history x D x N   | 4             | 13.14            | <b>0.011</b>     | 4             | 14.39            | <b>0.006</b>     | 4            | 11.81            | <b>0.019</b>     |
| Species ID x Soil treatment x D x N | 8             | 6.19             | 0.626            | 8             | 7.91             | 0.442            | 8            | 4.81             | 0.778            |

278

279

280 **Table 3** Summary of mixed-effect model analyses testing the effects of species identity (N =  
 281 4), legacy treatments (plant history, soil history, soil treatment), and their interactions on plant  
 282 performance (total biomass, shoot biomass, root biomass and root-shoot ratio), when non-  
 283 treated (control) or treated with global change drivers (drought, nitrogen input, drought and  
 284 nitrogen input [D x N]). Shown are degrees of freedom (Df), Chi<sup>2</sup> and P-values (P). Significant  
 285 effects (P < 0.05) are given in bold, marginally significant effects (P < 0.1) in italics.

286

|                     | Total biomass |                  |                  |         |                  |                  |          |                  |                  |       |                  |                  |
|---------------------|---------------|------------------|------------------|---------|------------------|------------------|----------|------------------|------------------|-------|------------------|------------------|
|                     | Control       |                  |                  | Drought |                  |                  | Nitrogen |                  |                  | D x N |                  |                  |
|                     | Df            | Chi <sup>2</sup> | P                | Df      | Chi <sup>2</sup> | P                | Df       | Chi <sup>2</sup> | P                | Df    | Chi <sup>2</sup> | P                |
| Species ID          | 3             | 57.93            | <b>&lt;0.001</b> | 3       | 37.43            | <b>&lt;0.001</b> | 3        | 60.10            | <b>&lt;0.001</b> | 3     | 27.83            | <b>&lt;0.001</b> |
| Plant history (PH)  | 1             | 0.04             | 0.840            | 1       | 2.08             | 0.149            | 1        | 4.86             | <b>0.027</b>     | 1     | 1.17             | 0.280            |
| Soil history (SH)   | 1             | 2.60             | 0.107            | 1       | 0.44             | 0.507            | 1        | 1.15             | 0.283            | 1     | 0.10             | 0.756            |
| Soil treatment (ST) | 2             | 0.80             | 0.670            | 2       | 0.46             | 0.795            | 2        | 3.78             | 0.151            | 2     | 3.28             | 0.194            |
| Species ID x PH     | 3             | 1.05             | 0.790            | 3       | 3.44             | 0.328            | 3        | 1.37             | 0.712            | 3     | 0.04             | 0.998            |
| Species ID x SH     | 3             | 3.06             | 0.382            | 3       | 2.48             | 0.478            | 3        | 1.61             | 0.657            | 3     | 2.48             | 0.479            |
| Species ID x ST     | 6             | 3.44             | 0.752            | 6       | 3.55             | 0.737            | 6        | 4.91             | 0.555            | 6     | 4.04             | 0.672            |
|                     | Shoot biomass |                  |                  |         |                  |                  |          |                  |                  |       |                  |                  |
|                     | Control       |                  |                  | Drought |                  |                  | Nitrogen |                  |                  | D x N |                  |                  |
|                     | Df            | Chi <sup>2</sup> | P                | Df      | Chi <sup>2</sup> | P                | Df       | Chi <sup>2</sup> | P                | Df    | Chi <sup>2</sup> | P                |
| Species ID          | 3             | 45.01            | <b>&lt;0.001</b> | 3       | 47.33            | <b>&lt;0.001</b> | 3        | 64.80            | <b>&lt;0.001</b> | 3     | 43.66            | <b>&lt;0.001</b> |
| Plant history (PH)  | 1             | 0.03             | 0.859            | 1       | 0.45             | 0.502            | 1        | 2.56             | 0.110            | 1     | 0.77             | 0.381            |
| Soil history (SH)   | 1             | 1.57             | 0.211            | 1       | 0.11             | 0.743            | 1        | 1.97             | 0.161            | 1     | 0.06             | 0.799            |
| Soil treatment (ST) | 2             | 0.24             | 0.886            | 2       | 2.51             | 0.286            | 2        | 4.39             | 0.112            | 2     | 1.91             | 0.385            |
| Species ID x PH     | 3             | 0.18             | 0.980            | 3       | 6.79             | <i>0.079</i>     | 3        | 4.34             | 0.227            | 3     | 0.60             | 0.900            |
| Species ID x SH     | 3             | 7.50             | <i>0.058</i>     | 3       | 2.08             | 0.556            | 3        | 0.06             | 0.996            | 3     | 0.67             | 0.881            |
| Species ID x ST     | 6             | 6.46             | 0.374            | 6       | 2.67             | 0.849            | 6        | 7.67             | 0.263            | 6     | 2.27             | 0.893            |
|                     | Root biomass  |                  |                  |         |                  |                  |          |                  |                  |       |                  |                  |
|                     | Control       |                  |                  | Drought |                  |                  | Nitrogen |                  |                  | D x N |                  |                  |
|                     | Df            | Chi <sup>2</sup> | P                | Df      | Chi <sup>2</sup> | P                | Df       | Chi <sup>2</sup> | P                | Df    | Chi <sup>2</sup> | P                |
| Species ID          | 3             | 107.40           | <b>&lt;0.001</b> | 3       | 93.04            | <b>&lt;0.001</b> | 3        | 101.11           | <b>&lt;0.001</b> | 3     | 81.40            | <b>&lt;0.001</b> |
| Plant history (PH)  | 1             | <0.01            | 0.957            | 1       | 2.79             | <i>0.095</i>     | 1        | 3.34             | <i>0.068</i>     | 1     | 1.20             | 0.274            |
| Soil history (SH)   | 1             | 2.79             | <i>0.095</i>     | 1       | 1.27             | 0.259            | 1        | 0.05             | 0.828            | 1     | 0.11             | 0.742            |
| Soil treatment (ST) | 2             | 0.60             | 0.740            | 2       | 0.74             | 0.691            | 2        | 2.08             | 0.354            | 2     | 4.40             | 0.111            |
| Species ID x PH     | 3             | 2.74             | 0.434            | 3       | 1.34             | 0.720            | 3        | 0.78             | 0.855            | 3     | 0.76             | 0.860            |
| Species ID x SH     | 3             | 3.68             | 0.299            | 3       | 3.00             | 0.391            | 3        | 3.11             | 0.375            | 3     | 4.02             | 0.259            |
| Species ID x ST     | 6             | 7.55             | 0.273            | 6       | 5.43             | 0.490            | 6        | 3.05             | 0.803            | 6     | 9.25             | 0.160            |

287

288 **Figures**

289

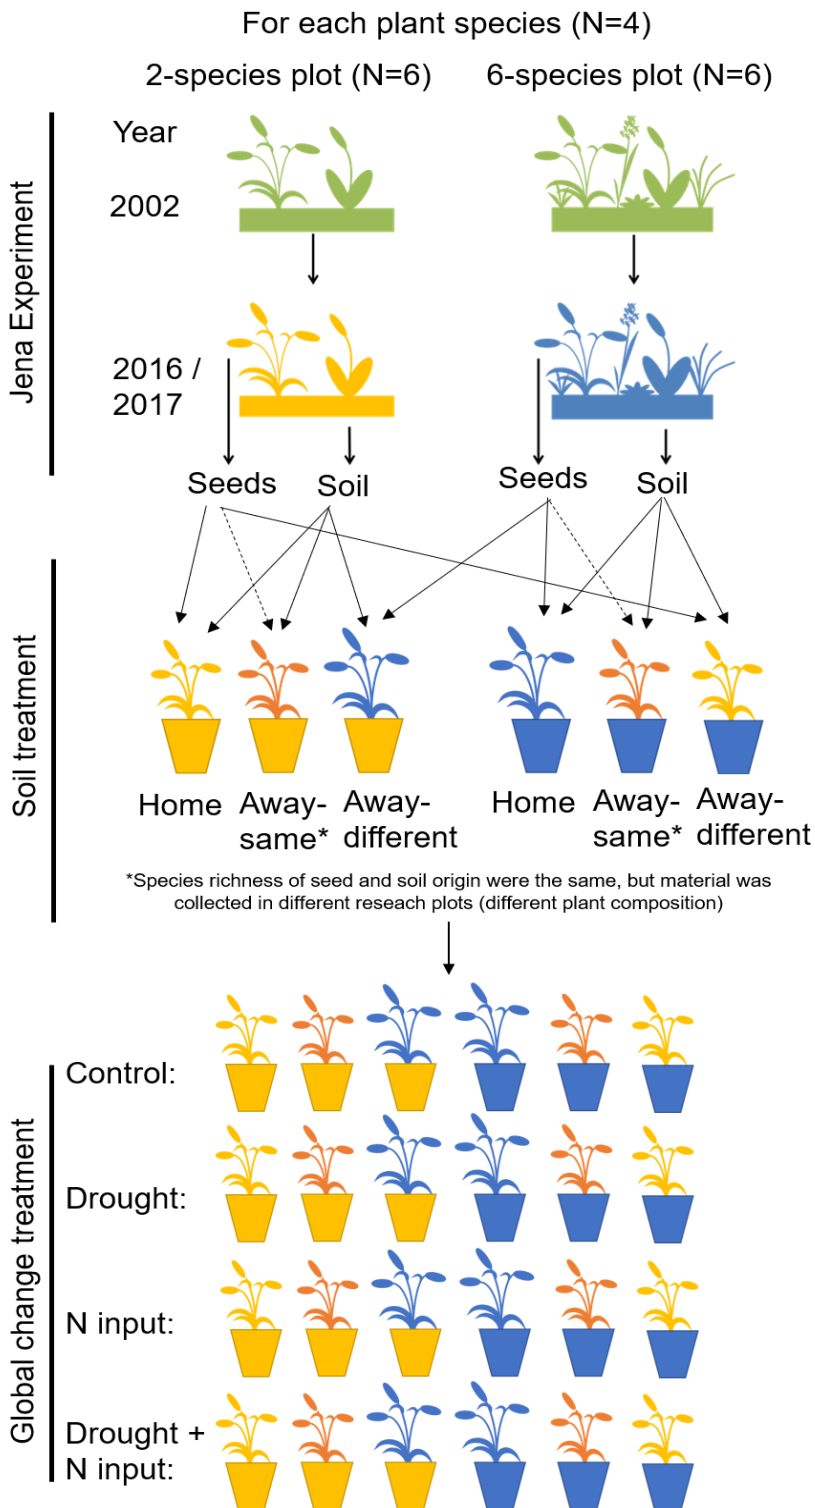

290

291 **Figure 1** caption on next page

292 **Figure 1** Overview of experimental design. In 2016, ripe seeds of four grass species were  
293 collected in two- and six-species plots of the Dominance Experiment (Jena Experiment), stored  
294 in a freezer and allowed to germinate in spring 2017. After germination, soil samples were  
295 collected from the plots and mixed with sterilized background soil (5% + 95%), filled in pots  
296 and planted with two seedlings (12 pot replicates per plot). In four pots per plot, plant and soil  
297 had the same plot origin (home soil); in four pots, species richness of plant and soil origin were  
298 the same, but plant species composition was different (away-same soil) and in four pots, species  
299 richness of plant and soil origin were different (= different origin of plant and soil; away-  
300 different soil; total  $N_{\text{pots}} = 576$ ). Plants were exposed to global change drivers: drought,  
301 nitrogen input, or the combination of drought and nitrogen input, or were not treated (control).



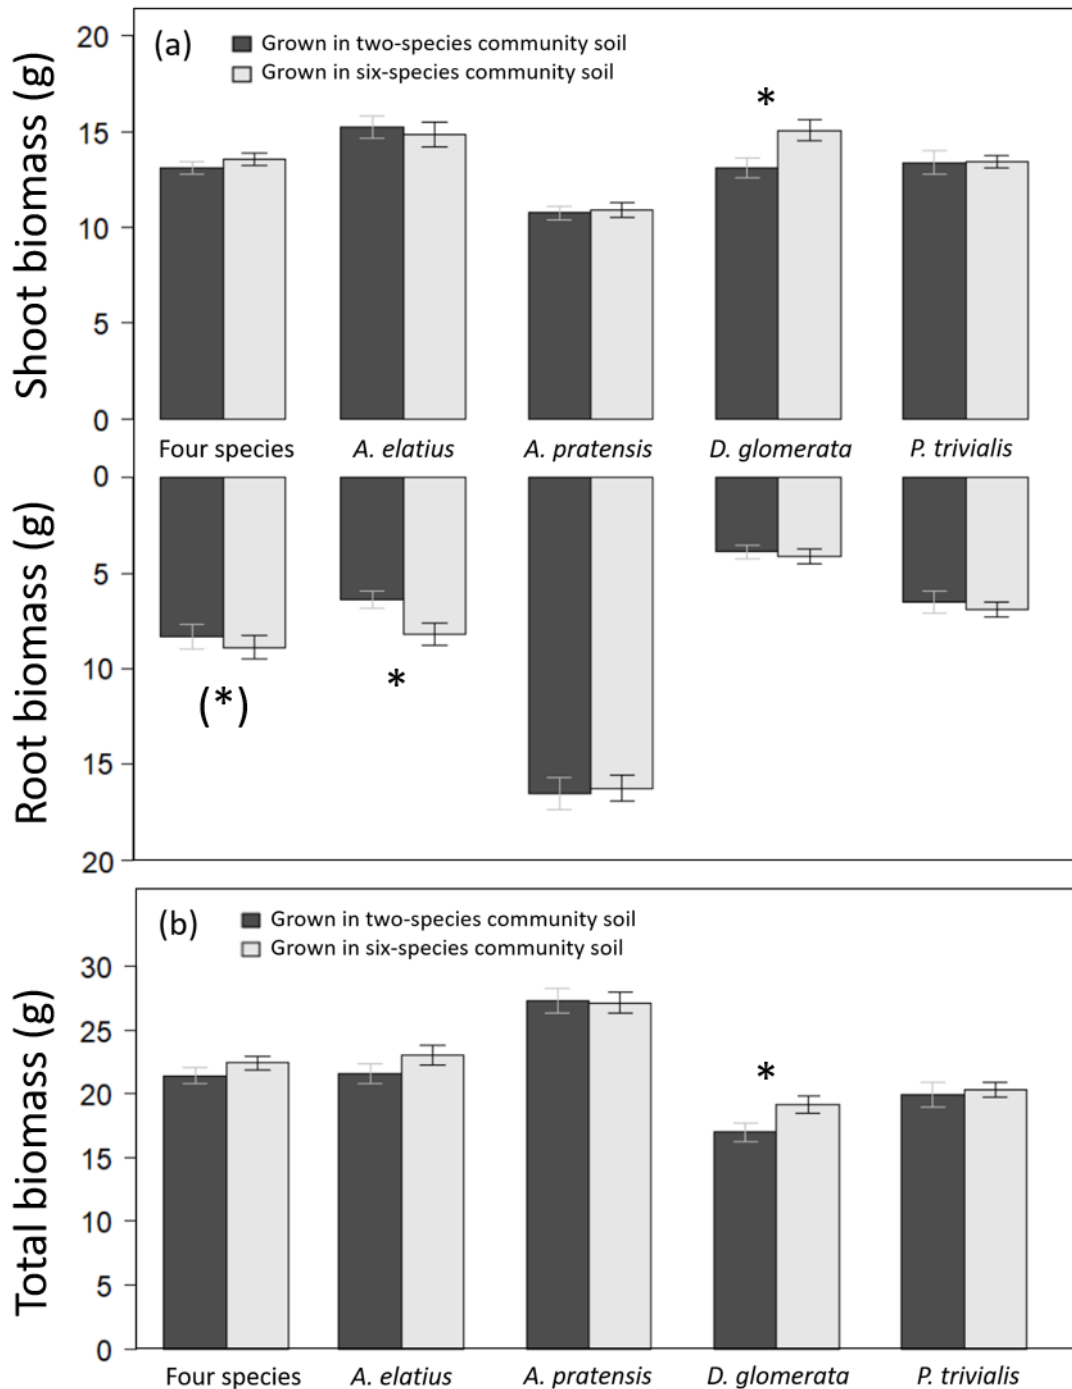

302

303 **Figure 2** Shoot and root biomass production (a), and total biomass production (b) of plants  
304 grown either in soil originated from two-species or six-species communities across all four  
305 study species and separately for each species. Bars show mean values ( $\pm 1$  SE); stars above bars  
306 indicate significant differences ( $P < 0.05$ ), stars in brackets indicate marginally significant  
307 differences ( $P < 0.1$ ).

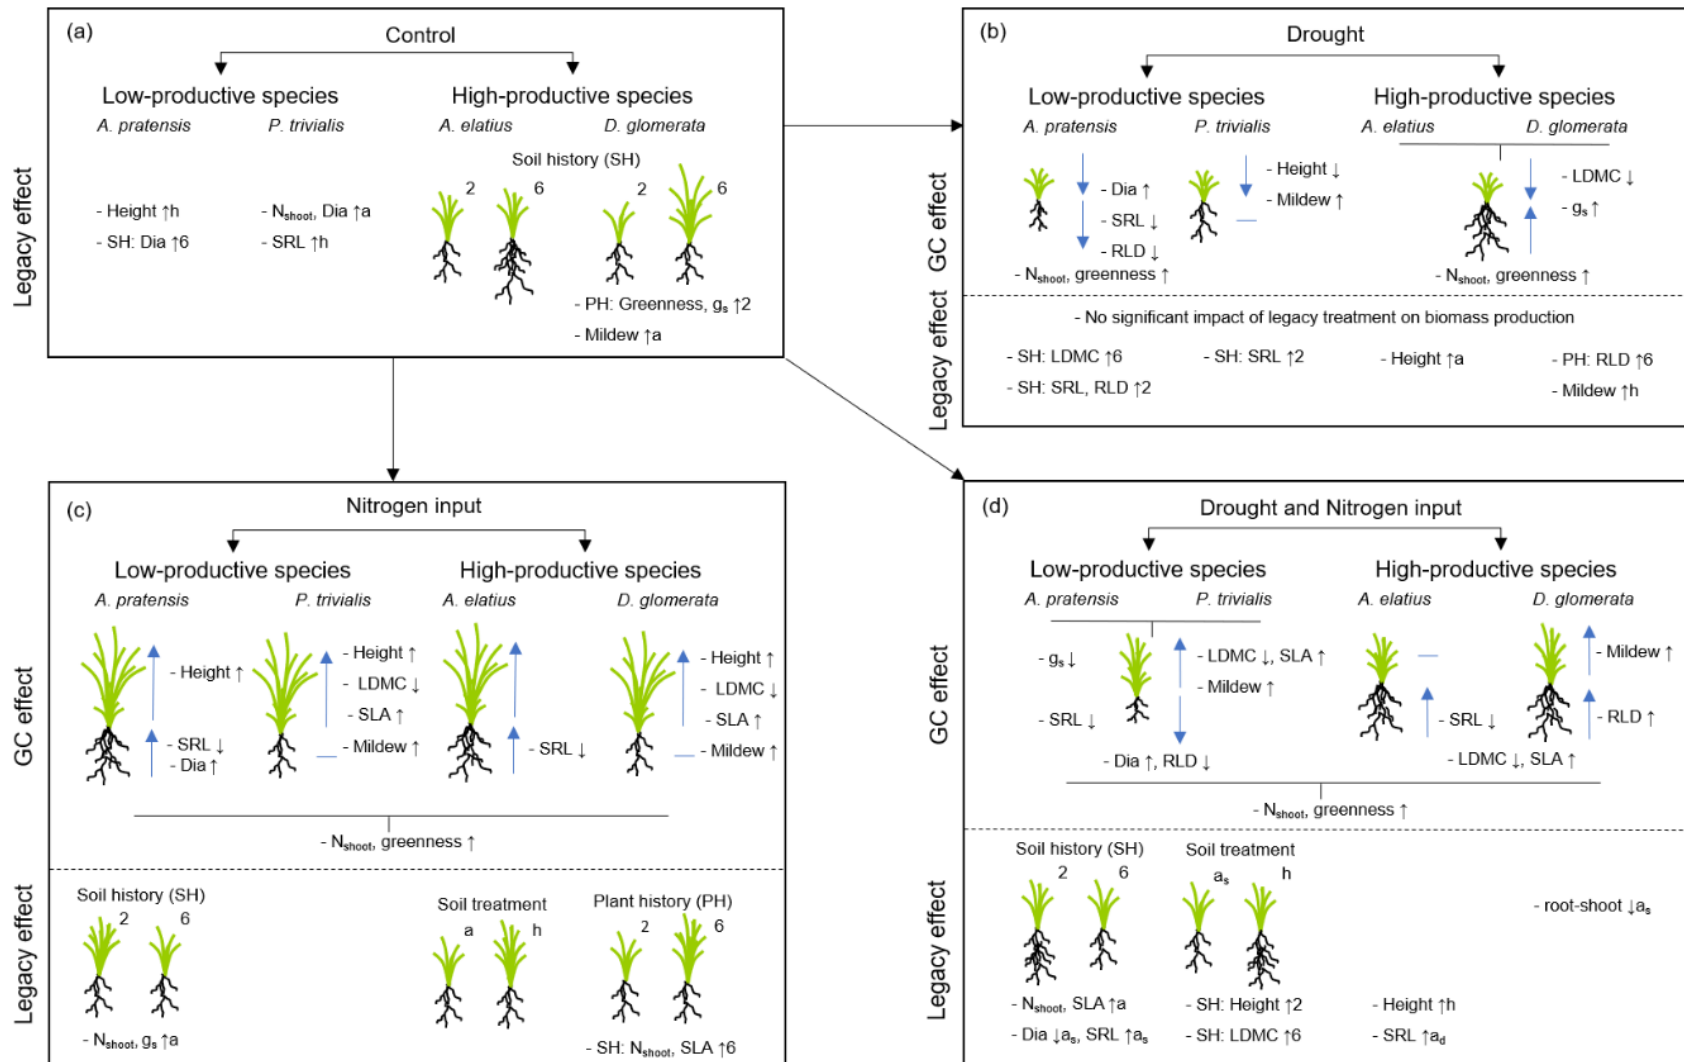

308

309 **Figure 3** caption on next page

310 **Figure 3** Schematic overview of the results of the common garden experiment testing how plants  
311 with a different origin (plant history) or grown in different soil (soil history, soil treatment) differ  
312 in performance and trait expression (a) and respond to global change drivers like drought (b),  
313 nitrogen input (c), and the combination of both (c). Illustrated is the impact of legacy treatments  
314 (= “legacy effect”) and global change treatments (= “global change effect”) on shoot and root  
315 biomass production as well as on plant traits (growth height (“Height”), shoot nitrogen  
316 concentration (“N<sub>shoot</sub>”), leaf greenness (“Greenness”), leaf dry matter content (“LDMC”), specific  
317 leaf area (“SLA”), stomatal conductance (“g<sub>s</sub>”), mildew infestation (“Mildew”), root diameter  
318 (“Dia”), specific root length (“SRL”), root length density (“RLD”)) of the four study species. For  
319 legacy effects, schematic illustrations of plants indicate differences in shoot and/or root biomass,  
320 when originated from two-species (“2”) or six-species (“6”) communities (= plant history (PH)),  
321 when grown in two-species (“2”) or six-species (“6”) community soil (= soil history (SH)), or  
322 when grown in away (“a”) or home (“h”) soil (= soil treatment; “a<sub>s</sub>” = away-same soil). Arrows  
323 behind traits (for legacy effects) indicate, in which treatment group the value was significant higher  
324 (arrow up) or lower (arrow down), e.g. “- SH: SLA ↑6” indicate that SLA in plants grown in six-  
325 species soil was higher than in two-species soil and “- LDMC ↑h” indicate that LDMC was higher  
326 in plants grown in home than in away soil. For global change effects, schematic illustrations of  
327 plants indicate whether shoot and/or root biomass of plants increased (blue arrow up) or decreased  
328 (blue arrow down) due to the impact of the respective global change driver (blue horizontal line  
329 indicate no change). Arrows behind traits (for global change effects) indicate and increase (arrow  
330 up) or decrease (arrow down) of the trait value due to the impact of the respective global change  
331 driver.

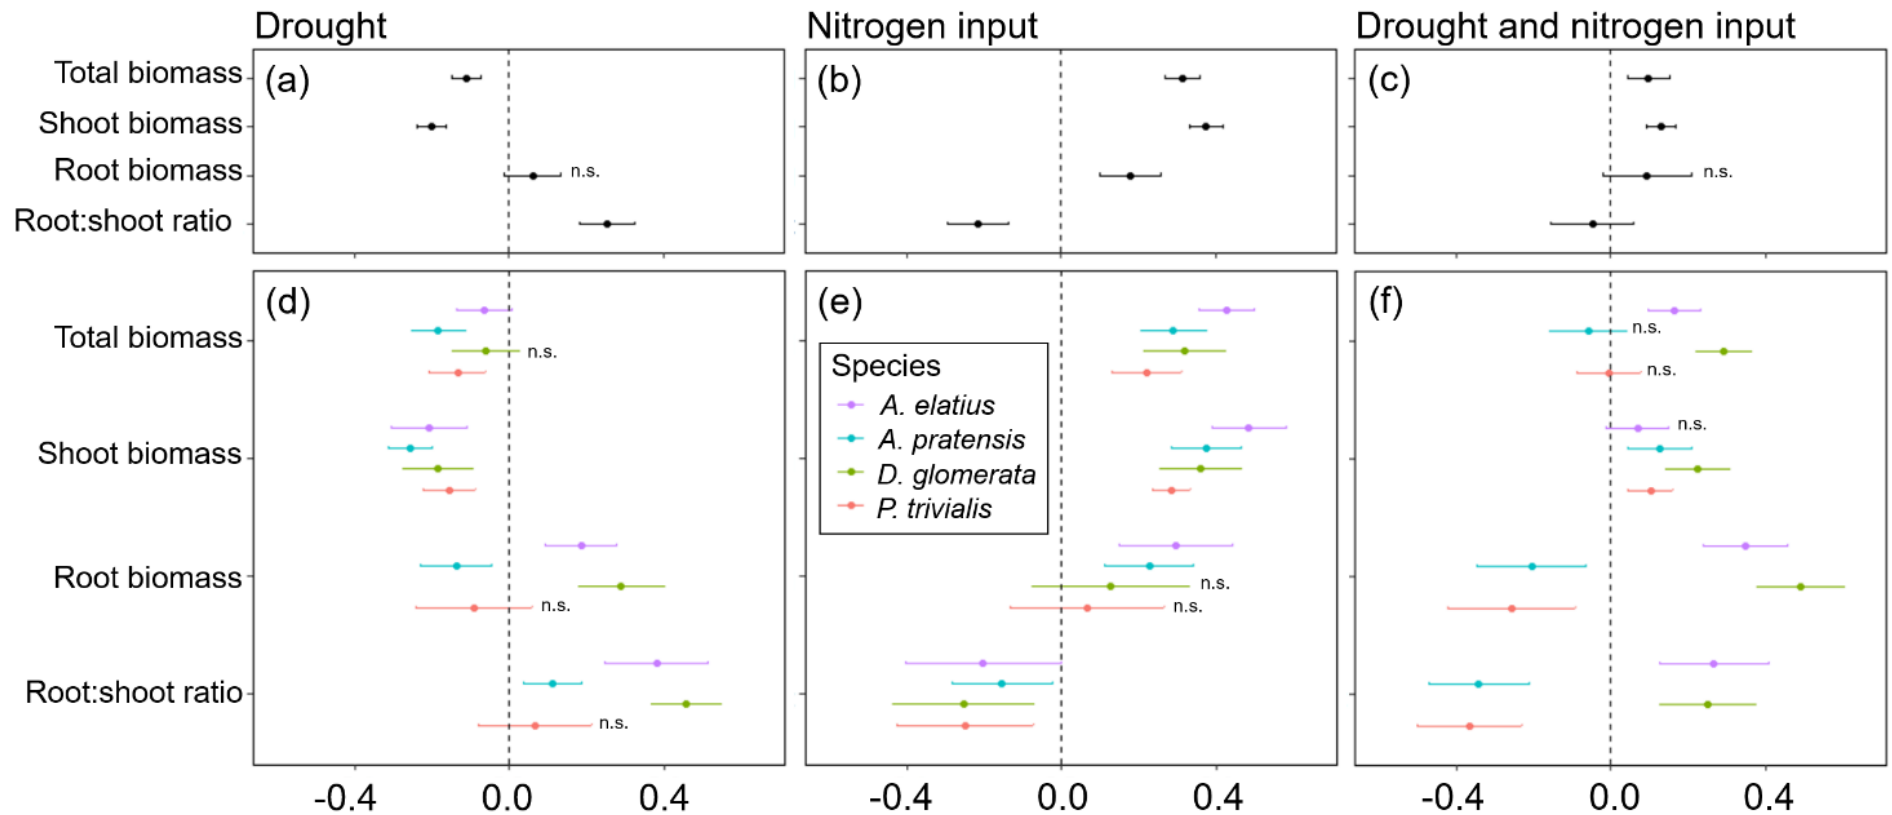

332

333 **Figure 4** Response of plants treated with drought, nitrogen input, or a combination of both relative to non-treated plants (control) for total biomass,  
 334 shoot biomass, root biomass, and root-shoot ratio across four study species (a-c) and separately for each species (d-f). Points are means and error  
 335 bars are standard deviation. No symbol indicates significant differences between plants treated with global change driver and control plants, “n.s.”  
 336 indicate no significant difference.

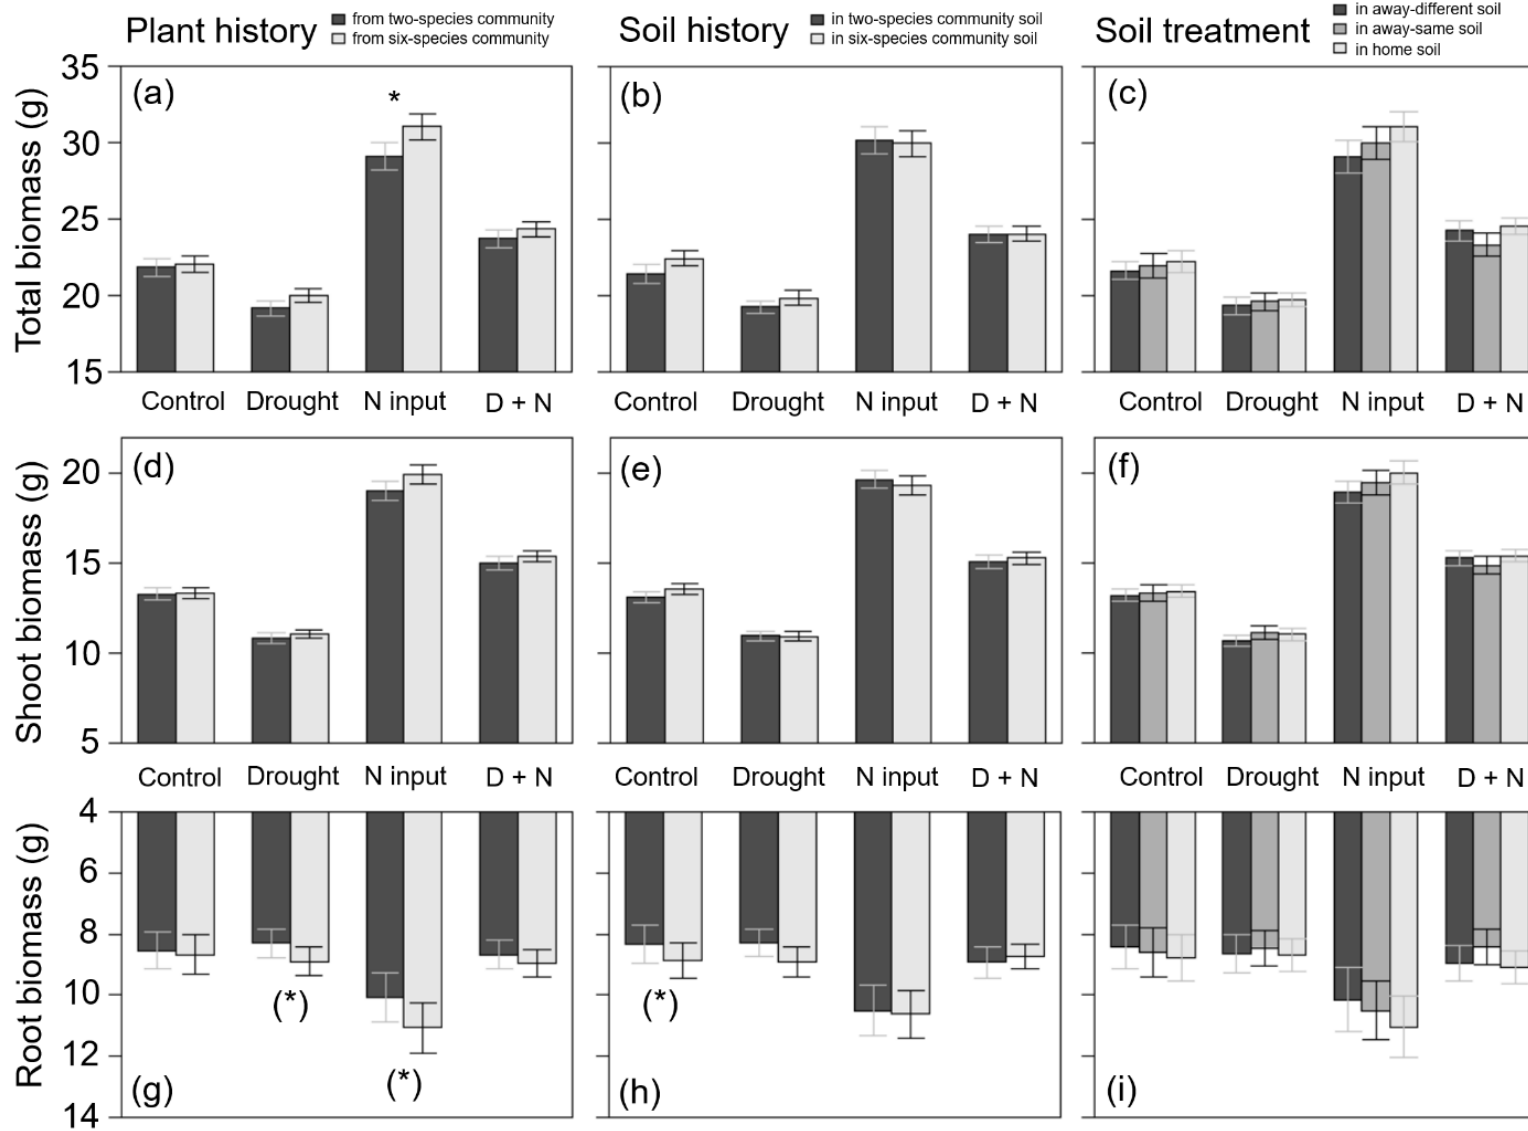

337

338 **Figure 5** caption on next page

339 **Figure 5** Total biomass (a-c), shoot biomass (d-f), and root biomass (g-i) of plants (across all  
340 four study species) originated from two- or six-species communities (plant history; a, d, g);  
341 grown in soil originated from two-species or six-species communities (soil history; b, e, h); or  
342 grown in home, away-same or away-different soil (soil treatment; c, f, i) and were either non-  
343 treated (control) or treated with drought, nitrogen input (N input) or a combination of both (D  
344 + N). Bars show mean values ( $\pm 1$  SE); stars above bars indicate significant differences ( $P <$   
345 0.05), stars in brackets indicate marginally significant differences ( $P < 0.1$ ).

346

347 **Discussion**

348

349 *Hypothesis 1: offspring of plants selected at different diversity and grown in different soil (high*  
350 *vs. low diversity, home vs. away) show differences in productivity and trait expression*

351 Our findings that *A. elatius* and *D. glomerata* plants in soil of high-diversity  
352 communities produce more biomass than in soil of low-diversity communities are in line with  
353 several greenhouse studies showing that soil conditioned by multiple plant species has a more  
354 positive impact on plant growth than soil conditioned by only one or two plant species  
355 (Guerrero-Ramírez et al. 2019; Yang et al. 2015). Plants probably suffered more from  
356 pathogens when grown in soil of low-diversity communities and/or benefitted more from  
357 interactions with soil mutualists in soil of high-diversity communities (Eisenhauer et al. 2019;  
358 Guerrero-Ramírez et al. 2019; Schnitzer et al. 2011). Interestingly, this soil legacy effect was  
359 only found in *A. elatius* and *D. glomerata*, which were both highly-productive species in the  
360 long-term field experiment. In contrast, the low-productive species *A. pratensis* and *P. trivialis*  
361 showed no significant difference when grown in differently conditioned soils. This is an  
362 indication that *A. elatius* and *D. glomerata* interact and/or benefit more, and *A. pratensis* and  
363 *P. trivialis* less, with soil mutualists, which are more abundant at high plant diversity, explaining  
364 our findings and the species-specific performance in the field experiment.

365 In contrast to biomass production, we did not find any significant influence of soil  
366 history on plant trait expression of *A. elatius* and *D. glomerata*. Nevertheless, we detected some  
367 other legacy treatment effects on plant trait expression, which was also found in related studies  
368 (van Moorsel et al. 2018a; van Moorsel et al. 2018b). The impact of soil history on root diameter  
369 of *A. pratensis*, and the impact of soil treatment (home/away) on the growth height of *A.*  
370 *pratensis*, on shoot nitrogen concentrations and root traits of *P. trivialis*, and on mildew  
371 infestation of *D. glomerata* indicate that plant-soil interactions influencing growth, defense, and  
372 resource use strategies of plants (Xi et al. 2021), while this impact is species-specific. Moreover,

373 *D. glomerata* plants had higher leaf greenness and stomatal conductance, when originated from  
374 low-diversity than from high-diversity plant communities. This could be an adaptation to higher  
375 light availability and lower soil moisture in low-diversity communities due to lower shading  
376 (Bachmann et al. 2018; Fischer et al. 2019; Lorentzen et al. 2008).

377

378 *Hypothesis 2: global change drivers have a strong impact on the productivity and trait*  
379 *expression of plants.*

380 In accordance with our second hypothesis, we found that drought reduced total biomass  
381 production. This was mainly caused by a loss of shoot biomass, while drought differently  
382 affected root biomass production of the studied grass species. Individuals of *A. elatius* and *D.*  
383 *glomerata* increased in root biomass at the expense of shoot biomass, leading to higher root-  
384 shoot ratio under drought. This is a commonly observed strategy to avoid dehydration, which  
385 enables plants to tap water from deeper soil layers (in the field) and at the same time minimizes  
386 the water loss caused by transpiration (Eziz et al. 2017). In contrast, the low-productive species  
387 either decreased instead of increased root biomass (*A. pratensis*) or did not change root biomass  
388 production (*P. trivialis*) under drought. Interestingly, the low-productive species had a three  
389 times higher loss of total biomass under drought (*A. pratensis*: -17.1%; *P. trivialis*: -15.3%)  
390 than the highly-productive species (*A. elatius*: -6.4%; *D. glomerata*: -5.7%, no significant loss  
391 of total biomass in *D. glomerata*). Presumably, the drought resistance strategy of *A. elatius* and  
392 *D. glomerata* is more effective, which is possibly a competitive advantage under the field  
393 conditions of the Jena Experiment, explaining the dominance of these species.

394 The influence of drought on the expression of plant traits was plant species-specific,  
395 except for shoot nitrogen concentrations and leaf greenness, which increased under drought in  
396 three species (except *P. trivialis*). Similar results were found in previous studies (Kocoń and  
397 Staniak 2014; Rolando et al. 2015) and indicate a general strategy against drought stress: plants  
398 decrease the cell density of shoot tissues, in line with the reduction of shoot biomass to minimize



399 the water loss, leading to an increase in the concentration of nitrogen compounds and  
400 chlorophyll (strong correlation between leaf greenness and chlorophyll concentration were  
401 found in Bachmann et al., 2018). At species-level, the low-productive species showed trait  
402 expression changes similar to biomass loss under drought, while the highly-productive species  
403 *D. glomerata* decreased in LDMC and increased in stomatal conductance, which is contrary to  
404 recent studies showing the opposite strategy to resist drought (high LDMC, low stomatal  
405 conductance) (Bristiel et al. 2018; Jaballah et al. 2008; Lozano et al. 2020). The results may  
406 differ because *D. glomerata* in our study was infested by the mildew *Blumeria graminis*, which  
407 may have changed the leaf structure, and thus also trait expression changes under drought.

408 Furthermore, our second hypothesis was confirmed by showing that nitrogen input  
409 increased biomass production. At species-level, shoot biomass was increased in all four species,  
410 while root biomass was enhanced only in *A. elatius* and *A. pratensis*. In *D. glomerata* and *P.*  
411 *trivialis*, there was also a slight, but non-significant increase in root biomass. Both species  
412 showed a strong increase in mildew infestation when fertilized. This confirms the nitrogen-  
413 disease hypothesis indicating that nitrogen supply increases infection severity by altering leaf  
414 properties and resources for pathogens (Dordas 2008). In *D. glomerata* and *P. trivialis*, severe  
415 infestation by powdery mildew *Blumeria graminis* may have led to a decrease in rates of net  
416 photosynthesis (Hibberd et al. 1996; Mandal et al. 2009), so that the reduced amount of energy  
417 was mainly invested in shoot biomass, e.g. for a higher leaf turnover, and less in root biomass.

418 We found consistent changes in plant trait expression over all four species in response  
419 to nitrogen input: growth height (except *A. elatius*), shoot nitrogen concentrations, and leaf  
420 greenness increased in all four species when fertilized, confirming an earlier study by Siebenkäs  
421 et al. (2015). Further nitrogen-induced changes in trait expression were likely affected by  
422 mildew infestation: the highly-infested species (*D. glomerata*, *P. trivialis*) showed lower  
423 LDMC and higher SLA, while LDMC and SLA of non-infested species did not change.  
424 Probably, *D. glomerata* and *P. trivialis* plants responded to the increase in mildew infestation

425 with a change in the leaf architecture (Cappelli et al. 2020), which could enable plants to turn  
426 over their leaves more quickly and thus produce constantly new and unaffected leaves. With  
427 regard to root traits, the non-infested species decreased in specific root length (and *A. pratensis*  
428 also in root diameter), while root traits remained unchanged in the highly-infested species. The  
429 decrease in SRL and increase in diameter (i.e. thicker and shorter roots) in combination with  
430 the increase in root biomass of the fertilized *A. elatius* and *A. pratensis* plants indicate that these  
431 plants changed the root architecture building fewer fine roots when nutrient availability is  
432 enhanced, which is in line with similar research (Siebenkäs et al. 2015).

433 Finally, we hypothesized that global change drivers cancel out each other's impact when  
434 applied together. This was true for the low-productive species *A. pratensis* and *P. trivialis*,  
435 which did not change in total biomass production compared to control plants as also found in  
436 other research (Carlsson et al. 2017). However, the strong decrease in root-shoot ratios indicates  
437 that *A. pratensis* and *P. trivialis* plants changed their growth strategies. Interestingly, the high-  
438 productive species *A. elatius* and *D. glomerata* slightly increased in total biomass, which is  
439 mainly explainable by the additive positive impact of drought and nitrogen input on root  
440 biomass, resulting in increased root-shoot ratios. Obviously, dominant (or highly-productive)  
441 species in our study benefitted more strongly from the combined application of the global  
442 change drivers in comparison to subordinate (or low-productive) species. Assuming that dry  
443 periods are becoming more frequent (Ruosteenoja et al. 2018) and nitrogen deposition may  
444 steadily rise (Reay et al. 2008), our results suggest that competitive interactions change under  
445 the impact of multiple global change drivers, and subordinate species may become more  
446 severely threatened by extinction (Pugnaire et al. 2019).

447 Moreover, our results show that the combined effects of the two global change drivers  
448 on plant trait expression may differ from the effect of drought or nitrogen input alone, with  
449 strong negative effects for some plant species (e.g. highest mildew infestation of *P. trivialis*  
450 under combined impact of global change drivers). This suggests that plants change in

451 physiology and morphology and thus in their response to global change, when a combined  
452 impact becomes more frequent, with an unknown influence on community composition and  
453 ecosystem functioning in the long term. This finding underlines the need for studies  
454 investigating multiple, interacting global change drivers (Rillig et al. 2019; Thakur et al. 2018).

455

456 *Hypothesis 3: offspring of plants selected at different diversity and grown in different soil (high*  
457 *vs. low diversity, home vs. away) respond differently to global change drivers*

458         The soil history effect, i.e. the beneficial effect of soil biota from high-diversity plant  
459 communities on biomass production of control plants, disappeared in treatments with global  
460 change drivers, which may be explainable by a change in soil community structure under  
461 drought (Kaisermann et al. 2017; Pugnaire et al. 2019) and/or nitrogen input (Wei et al. 2018).  
462 In line with our result, similar studies have shown that drought (Fry et al. 2018; Wilschut and  
463 van Kleunen 2021) and nitrogen input (in 't Zandt et al. 2019) can interrupt or change plant-  
464 soil interactions. As a result, the beneficial effect of soil biota from high-diversity communities  
465 in *A. elatius* and *D. glomerata* could have been lost due to the reduction of soil mutualists (Yang  
466 et al. 2021) and/or an increase in soil-borne pathogens caused by global change drivers  
467 (Delgado-Baquerizo et al. 2020; Tylianakis et al. 2008; van der Putten et al. 2016).

468         Next to soil history, we also found altered plant responses to global change drivers when  
469 plants originated from low- or high-diversity communities (plant history). When treated with  
470 drought, there was no significant difference, but nitrogen input had a more positive impact on  
471 plants originated from high-diversity than from low-diversity communities. One possible  
472 explanation is that plants at high diversity were selected for greater niche complementarity  
473 (Zuppinger-Dingley et al. 2014), while plants at low diversity were selected for increased  
474 defense against species-specific pathogens (Eisenhauer et al. 2019), that are often accumulate  
475 in low-diversity environments (Eisenhauer et al. 2012). Consequently, the offspring of  
476 individuals originated from high-diversity communities may be more efficient in allocating

477 additional resources in increased growth, explaining our results. Interestingly, we did not find  
478 any significant plant history effect in plants treated with both global change drivers, indicating  
479 that drought had a strong impact on the growth strategy of the plants and can counteract positive  
480 diversity effects.

481 Finally, we found that plants in home and away soil may respond differently to global  
482 change drivers; however, this was only true for the high-productive species *A. elatius*: plants  
483 benefitted more from fertilization in home and away-same than in away-different soil. The  
484 home advantage supports the idea that a decrease of plant diversity can lead to changes in plant-  
485 soil interactions and thus to differences in eco-evolutionary feedbacks at low and high diversity  
486 (terHorst and Zee 2016). With our data in hand, we cannot determine the exact reason why we  
487 found the home advantage under fertilization but not under control conditions; however, our  
488 results show that plants may respond differently to global change drivers depending on the soil  
489 community with which they interact.

490 Similar to the biomass production results, almost all differences in trait expression found  
491 in control plants disappeared when treated with global change drivers. Instead, many other  
492 changes in trait expression occurred depending on the type of global change driver treatment  
493 and plant species identity. Taken together, these results indicate that mainly soil biota (soil  
494 history and soil treatment) and only to a lesser extent plant history play an important role in the  
495 expression of traits under the influence of global change drivers. This suggests that the soil  
496 biota composition is strongly associated with the physiology and morphology of the plants.  
497 Therefore, shifts in soil biota composition due to plant species loss and/or global change driver  
498 impact can have strong effects on the response of plants to global change, which could further  
499 accelerate plant community change and species loss (Pugnaire et al. 2019; Yang et al. 2021).

500

## 501 **Conclusion**

502

503           In the present study, we showed for the first time that offspring of plants selected at low  
504 and high plant diversity differently respond to global change and that plant-soil interactions  
505 play a significant role in this process. This suggests that not only external influences (i.e. global  
506 change drivers), but related changes within the community (i.e. changes in eco-evolutionary  
507 feedbacks) could promote a further loss of species and thus an acceleration of global change  
508 effects. To confirm this assumption, future research should test the long-term influence of  
509 global change drivers on soil biota and plants selected at low and high diversity under more  
510 realistic conditions, such as plants growing in communities under field conditions.

511

## 512 **Materials and methods**

513

### 514 *The Jena Experiment*

515           Seed and soil material for our common garden experiment was collected from a long-  
516 term biodiversity experiment, the Jena Experiment, which is located in the floodplain of the  
517 Saale river near Jena (Thuringia, Germany, 50° 55'N, 11° 35'E, 130 m a.s.l.) (Roscher et al.  
518 2004; Weisser et al. 2017). Before the establishment of the Jena Experiment in 2002, the site  
519 was a highly fertilized arable field, which had been used for growing wheat and vegetables from  
520 the early 1960s until 2000. Mean annual air temperature recorded from 2007 to 2016 at the  
521 experimental site (Weather Station Jena-Saaleaue, Max-Planck-Institute for Biogeochemistry  
522 Jena, [https://www.bglobal\\_change-jena.mpg.de/wetter/](https://www.bglobal_change-jena.mpg.de/wetter/)) was 9.7°C, and mean annual  
523 precipitation was 587 mm. The soil of the study site is a Eutric Fluvisol, whereas soil texture  
524 changes from sandy loam to silty clay with increasing distance from the river Saale. Thus, four  
525 blocks were arranged parallel to the riverside (Roscher et al., 2004).

526           Material for our study was collected in a sub-experiment of the Jena Experiment, the so-  
527 called Dominance Experiment. The species pool of this experiment included nine species,  
528 which often reach dominance in Central European mesophilic grasslands of the Arrhenatherion

529 type (Ellenberg 1988): five grasses, two legumes, and two herbs. Sown plant species richness  
530 levels were 1, 2, 3, 4, 6, and 9 species. Each species occurred eight times in the different  
531 compositions of each species-richness level. Moreover, each possible two-species combination  
532 was present with equal frequency at each species-richness level of the mixtures (i.e. 2-9 species;  
533 more information about the design can be found in Roscher et al. 2004). In May 2002, seeds  
534 were sown with a density of 1000 viable seeds per m<sup>2</sup>. Seeds from all species were purchased  
535 from a commercial supplier (Rieger-Hoffman GmbH, Blaufelden-Raboldshause, Germany).  
536 From 2002 to 2009, plants were grown in plots of 3.5 × 3.5 m; from 2010 onwards, plot size  
537 was reduced to 1 × 1 m. Plots were mown every year in June and September and mown plant  
538 material was removed. All plots were regularly weeded and never fertilized.

539

#### 540 *Seed collection, selection of study species, and experimental plots*

541 In summer 2016, we collected seed material from the nine species in all Dominance  
542 Experiment plots (as bulk sample per species and plot) and stored them in a freezer (at -20°C)  
543 until further use. We chose four grass species (*Alopecurus pratensis* L., *Arrhenatherum elatius*  
544 (L.) P. Beauv. ex J. Presl et C. Presl, *Dactylis glomerata* L., *Poa trivialis* L.) as study species.  
545 Furthermore, we selected 12 plots per species (six two-species and six six-species plots, i.e. 48  
546 plots in total), where sufficient seed material was available. The selected plots were evenly  
547 distributed in the four blocks of the experiment (Roscher et al. 2004). The study species differed  
548 strongly in their biomass production in the Dominance Experiment plots. In the two-species  
549 plots, all four species showed a high biomass production; however, in the six-species plots, only  
550 *A. elatius* and *D. glomerata* were highly-productive, while *A. pratensis* and *P. trivialis* showed  
551 intermediate levels and decreased in biomass production over the years (Clark et al. 2019;  
552 Roscher et al. 2007). For simplification, from here onwards, *A. elatius* and *D. glomerata* are  
553 referred to as “highly-productive” species, while *A. pratensis* and *P. trivialis* are referred to as  
554 “low-productive” species.

555

556 *Preparation of background substrate and study plants*

557 For the pot substrate, we used a sterilized sand-soil mix (= background substrate), which  
558 was then inoculated with fresh living soil (5% of the total substrate by weight) from the selected  
559 plots. This inoculation method is a common procedure to investigate plant-soil interactions and  
560 has the advantage that only low amounts of living soil are needed and that potential abiotic  
561 feedbacks are eliminated (Pernilla Brinkman et al. 2010). To produce sterile background  
562 substrate, we collected 1.6 m<sup>3</sup> soil substrate from the Jena Experiment in May 2017. This soil  
563 substrate was a mix of excavated soil material from different experimental plots, which was  
564 stored for several years at the experimental area. The soil substrate was sieved to 10 mm,  
565 homogenized, and mixed with 0.4 m<sup>3</sup> quartz sand (WF 33, Quarzwerke GmbH, Walbeck,  
566 Germany). Afterwards, the soil-sand mix was steam-sterilized twice for 150 minutes at ~80°C.  
567 More information about the steam-sterilization method and changes of abiotic and biotic soil  
568 properties can be found in Dietrich et al. (2020).

569 For the preparation of study plants, QuickPot<sup>TM</sup> trays of 20 cm<sup>3</sup> volume (Hermann Meyer  
570 KG, Rellingen, Germany) were sterilized with a potassium hypochlorite solution (Eau de Javel:  
571 2.6 g KClO to 100 ml water; 1:1) and filled with an autoclaved mixture of sand and soil from  
572 the Jena Experiment (1:1; sterilized twice for 40 min at 121°C) in June 2017. Each species and  
573 origin (i.e. plot) was sown with two or three seeds per pot plate cell. QuickPot<sup>TM</sup> trays were  
574 placed in an open greenhouse (Research Station Bad Lauchstädt, UFZ) to promote germination  
575 by natural daily temperature fluctuations. Trays were regularly watered (with demineralized  
576 water). On 29 June 2017, *A. pratensis* seeds were reseeded because of low germination rate.  
577 For the other three species, one seedling per pot plate cell was removed if more than two seeds  
578 were germinated.

579

580 *Common garden experiment*

581 In July 2017, 12 soil cores (5 cm diameter, 10 cm depth) were taken in a grid of 20 x 20  
582 cm in each Dominance Experiment plot selected for the study and stored in a cooling chamber  
583 (4°C). Soil cores were pooled per plot and sieved through a sieve with 5 mm mesh size to  
584 remove stones and coarse roots. Then, 2800 cm<sup>3</sup> steam-sterilized background substrate was  
585 thoroughly mixed with 150 cm<sup>3</sup> fresh-sieved living soil and filled in a heat-cleaned pot (3 L,  
586 diameter 14.9 cm, height 18 cm) with 12 replicates per plot. Seedlings per pot plate cell were  
587 separated, and two seedlings per species with same plot origin were transplanted into one pot  
588 (Fig. 1). In four pots per plot, we transplanted plants, which had the same plot origin as the  
589 inoculated soil (home soil treatment); in the other eight pots, plant and soil origin were different  
590 (away soil treatment). In four of these away pots, species richness of plant and soil origin was  
591 the same, but plant species composition was different (away-same soil treatment), and in the  
592 other four away pots, species richness of plant and soil origin was different (away-different soil  
593 treatment; Fig. 1). Seedlings of *D. glomerata* were transplanted on 18 July 2017, followed by  
594 *A. elatius* (20 July 2017), *P. trivialis* (20 and 24 July 2017), and *A. pratensis* (26 – 28 July  
595 2017). Seedlings were immediately watered with 200 ml demineralized water after  
596 transplantation, and the initial number of shoots was counted. In total, the experiment consisted  
597 of 576 pots, each with two plants. The pots were placed in an open greenhouse with a roof,  
598 which automatically closes at rain, and ambient temperatures (Research Station Bad  
599 Lauchstädt, UFZ). Pots were distributed in six blocks placing the 12 pots filled with soil from  
600 one plot in one block, i.e. in each block there were 12 pots with soil of one two-species and one  
601 six-species plot per species. The position of the pots within the blocks was randomly chosen  
602 and changed once a month to avoid potential side effects by neighboring pots and edge effects  
603 of the tables.

604 During the first week after planting, plants were watered every day with 200 ml  
605 demineralized water. From week two to four, all pots were watered every other day with 380  
606 ml demineralized water without further treatments to allow the establishment of plants and soil



607 biota in the pots (380 ml were used to achieve a water saturation of the soil of 60%; calculation  
608 can be found in Appendix S1). On 23 August 2017, treatments with the global change drivers  
609 were started. For every treatment (control, drought, nitrogen input, combination of drought and  
610 nitrogen input), we used three of the 12 pots per plot (one home, one away-same, and one away-  
611 different pot, respectively; Fig. 1).

612 (I) For control, pots were watered as before (380 ml; every other day) and were not  
613 fertilized.

614 (II) Drought was simulated by reduced water saturation (= 30% water saturation = 225 ml;  
615 calculation can be found in Appendix S1). Pots were still watered every other day but  
616 with 225 ml instead of 380 ml demineralized water.

617 (III) Nitrogen input was applied once a week with 95 mg  $\text{NH}_3\text{NO}_4$  (33.125 mg nitrogen)  
618 resulting in a total nitrogen amount of 265 mg after eight fertilization events, which is  
619 equivalent to a nitrogen input of  $150 \text{ kg ha}^{-1} \text{ year}^{-1}$  nitrogen (medium value for managed  
620 grasslands in Germany; Häußermann et al 2019). Fertilized plants were watered as  
621 before (380 ml; every other day).

622 (IV) For the combination of drought and nitrogen input, pots were watered with a reduced  
623 amount (225 ml) and were fertilized once a week (in the same way as for the nitrogen  
624 input treatment alone).

625 Once a month, all pots were weighted before watering. The measured weight per pot was  
626 subtracted from dry soil weight plus the assigned amount of water (380 or 225 ml). The  
627 difference revealed the amount of water which was then used to water the pot to keep the  
628 anticipated levels of water saturation for the drought and control treatment.

629

630 *Data collection*

631 After 11 weeks of growth with global change driver treatments, plants were harvested  
632 block-wise (between 16 October and 8 November 2018). Before harvest, aboveground traits  
633 and leaf fungal pathogen infestation were measured (Table 1). For growth height (in cm), we  
634 measured the stretched shoot length of the longest vegetative shoot per plant. Only 15% of the  
635 plants had flowered, which was neglected due to the small case number. For leaf greenness  
636 (unitless estimate of foliar chlorophyll content), three fully expanded leaves from vegetative  
637 shoots of each plant were measured with a SPAD 502 Plus Chlorophyll Meter (Spectrum  
638 Technologies, Inc.) and values were averaged per plant. Stomatal conductance ( $\text{g}_s; \text{mmol m}^{-2} \text{s}^{-1}$ )  
639 was measured at one fully expanded leaf per plant (i.e. two leaves per pot) with a SC-1 Leaf  
640 Porometer (Decagon Devices Inc.). This was done block-wise and always one day after  
641 watering, between 10 a.m. and 3 p.m. Shortly before harvest, the percentage of total leaf area,  
642 which was infested by fungal pathogens was estimated for each plant. A subsample of leaves  
643 per species was taken to identify pathogens morphologically at the species level under a light  
644 microscope. Moreover, three fully expanded leaves per individual were cut, packed in wet paper  
645 towels to achieve water saturation, and stored overnight in a cooling chamber at  $4^\circ\text{C}$ . On the  
646 next day, leaves were weighed as bulk sample per pot (i.e. six leaves) after removing water  
647 droplets with tissue paper. Afterwards, total leaf area was measured with a leaf area meter (LI-  
648 3000C Area Meter equipped with LI3050C transparent conveyer belt accessory, LICOR, USA).  
649 LDMC was calculated as the ratio of dry weight to fresh weight ( $\text{mg}_{\text{leaf}} \text{g}_{\text{leaf}}^{-1}$ ) and SLA as the  
650 ratio of leaf area to dry weight ( $\text{mm}_{\text{leaf}}^2 \text{mg}_{\text{leaf}}^{-1}$ ).

651 For biomass harvest, plants were cut at ground level, and roots were cleaned by rinsing  
652 off all soil over a 0.5 mm sieve. The fresh root biomass was weighed and a subsample of around  
653 1-2 g fresh weight was stored at  $-20^\circ\text{C}$ . At a later point, roots were thawed and scanned on a  
654 flatbed scanner at 800 dpi (Epson Expression 10000 XL scanner, Regent Instruments, Quebec,  
655 Canada), and root diameter and root length of the subsample were measured with an image  
656 analysis software (WinRHIZO; Regent Instruments, Quebec City, Canada). Specific root length

657 (SRL) was calculated as the ratio of root length to root dry biomass (of the subsample;  $m_{\text{root}}$   
658  $g_{\text{root}}^{-1}$ ) and root length density (RLD) as the ratio of root length to soil volume in the pot (root  
659 length was extrapolated from the ratio of dry root biomass of the measured subsample to total  
660 dry root mass per pot;  $cm_{\text{root}} cm_{\text{soil}}^{-3}$ ).

661 All biomass and leaf samples were dried at 70°C for 48 h and then weighed. To calculate  
662 total shoot biomass per pot (each with two individuals), dry shoot biomass and dry leaf mass of  
663 the sample used for leaf area measurements were added. To calculate total root biomass, dry  
664 biomass of the scanned subsample was extrapolated from the ratio of fresh root biomass to dry  
665 root biomass per pot and added to the weighed dry root biomass per pot.

666 For chemical analysis, shoot biomass of each pot was chopped, and a subsample was  
667 ground with a ball mill. Then, 10 mg milled material was used to determine shoot nitrogen  
668 concentration with near-infrared spectroscopy (MPA Multi Purpose FT-NIR Analyzer, Bruker  
669 GmbH, Ettlingen, Germany). The calibration models used to predict shoot nitrogen  
670 concentrations were derived from laboratory data generated from previous samples of grass  
671 species. The accuracy of the predictions was verified by a repeated nitrogen concentration  
672 analysis of 45 randomly selected samples with an elemental analyzer (Vario EL Element  
673 Analyzer, Elementar, Hanau, Germany). Significant positive correlation ( $p < 0.001$ ,  $r = 0.97$ ,  $N$   
674  $= 45$ ) between concentrations resulted from near-infrared spectroscopy and analysis with the  
675 elemental analyzer demonstrate high accuracy of our predictions.

676

#### 677 *Data analysis*

678 To test whether the plants performed differently depending on legacy treatments (plant  
679 history, soil history, soil treatment [home/away]), or type of global change treatment, linear  
680 mixed-effects models were fitted for all measured response variables per pot as summarized in  
681 Table 1. Furthermore, some variables were transformed to meet the assumptions of normality  
682 and variance homogeneity: if necessary, root biomass and RLD were square root-transformed

683 and root-shoot ratio, SLA, stomatal conductance, SRL, and pathogen infestation were log-  
684 transformed. Furthermore, outlier values of LDMC of three *P. trivialis* pots (extremely low  
685 values), and LDMC and SLA of one *A. elatius* pot (extremely low LDMC, high SLA), were  
686 excluded from the analysis.

687 For mixed-effect model analysis, we started with a null model with the random effects  
688 only. We used seed plot identity (plot, where the seeds had been collected) and soil plot identity  
689 (plot, from which the inoculation soil had been taken) as random effects. Then, we successively  
690 added the fixed effects with species identity first, followed by the legacy treatments: plant  
691 history (species richness of the plant community, where the seeds had been collected: two or  
692 six), soil history (species richness of the plant community, where the soil for inoculation had  
693 been taken: two or six), and soil treatment (home, away-same, away-different), followed by the  
694 global change driver treatments: drought (control or drought) and nitrogen input (control or  
695 nitrogen), and finally all interactions between species identity and the other fixed effects to  
696 check whether species differ in their responses. For analysis of stomatal conductance, we used  
697 daytime and air temperature as covariates, which were entered before adding the experimental  
698 factors to account for possible effects of the measurement time.

699 Because of multiple significant interactions between species identity and other fixed  
700 effects (Table 2), we further analyzed the response variables separately per species. Therefore,  
701 we used the same fixed effect structure as explained above, but without species identity and  
702 additionally with the interactions between legacy treatments and global change driver  
703 treatments (which was not done in the first model, because otherwise, it would have become  
704 too complex). For pathogen infestation, we only analyzed data of *D. glomerata* and *P. trivialis*,  
705 because of very low infestation rates of *A. elatius* and *A. pratensis* plants. To test whether initial  
706 size influenced the performance of the phytometers later in the experiment, we added initial  
707 shoot number as a fixed effect before the other fixed effects in separate models for analysis of  
708 shoot and root biomass production.

709 Because of multiple significant interactions between legacy treatments and global  
710 change driver treatments (Appendix S2: Table S1-S10), we further analyzed the data for each  
711 global change driver treatment separately. We used plant history, soil history, and soil treatment  
712 as fixed effects for species-specific analysis, and for analyses across all four species, we  
713 extended the models by fitting species identity first and all possible interactions between species  
714 identity and legacy treatments in the end.

715 All models were fitted with maximum likelihood (ML), and likelihood ratio tests were  
716 used to decide on the significance of the fixed effects. Tukey's HSD test was used to test  
717 differences among soil treatment groups. All calculations and statistical analyses were done in  
718 R (version 3.6.1, R Development Core Team, <http://www.R-project.org>) including the package  
719 *lme4* (glmer and lmer) (Bates et al. 2015) and *multcomp* (Tukey HSD) (Hothorn et al. 2016) for  
720 mixed-effects model analysis.

721

## 722 **Acknowledgements**

723 We thank the technicians of the experimental research station Bad Lauchstädt, who  
724 helped with the establishment, maintenance and harvest of the experiment. Furthermore, we are  
725 grateful to Laura Bergmann for help during the experiment, and Peter Otto for identifying the  
726 fungal pathogens. The Jena Experiment is funded by the German Research Foundation (FOR  
727 1451), supported by the University of Jena, the Max Planck Institute for Biogeochemistry and  
728 the German Centre for Integrative Biodiversity Research (iDiv) Halle-Jena-Leipzig, funded by  
729 the German Research Foundation (FZT 118). Further support was provided by the Heinrich  
730 Böll Foundation (PhD scholarship to PD).

731

## 732 **Data availability**

733 The data that support the findings of this study are openly available in BExIS at  
734 <https://jexis.idiv.de/ddm/data/Showdata/238>

735

736 **References**

- 737 Bachmann D., Roscher C., Buchmann N. (2018) How do leaf trait values change spatially and  
738 temporally with light availability in a grassland diversity experiment? *Oikos* 127:935-  
739 948. doi: 10.1111/oik.04533
- 740 Bailey J.K., Wooley S.C., Lindroth R.L., Whitham T.G. (2006) Importance of species  
741 interactions to community heritability: a genetic basis to trophic-level interactions.  
742 *Ecology Letters* 9:78-85. doi: 10.1111/j.1461-0248.2005.00844.x
- 743 Bates D. et al. (2015) Package ‘lme4’. *Convergence* 12:2
- 744 Bristiel P., Gillespie L., Østrem L., Balachowski J., Violle C., Volaire F. (2018) Experimental  
745 evaluation of the robustness of the growth–stress tolerance trade-off within the perennial  
746 grass *Dactylis glomerata*. *Functional Ecology* 32:1944-1958. doi: 10.1111/1365-  
747 2435.13112
- 748 Cappelli S.L., Pichon N.A., Kempel A., Allan E. (2020) Sick plants in grassland communities:  
749 a growth-defense trade-off is the main driver of fungal pathogen abundance. *Ecology*  
750 *Letters* 23:1349-1359. doi: 10.1111/ele.13537
- 751 Cardinale B.J. et al. (2007) Impacts of plant diversity on biomass production increase through  
752 time because of species complementarity. *Proceedings of the National Academy of*  
753 *Sciences of the United States of America* 104:18123-18128. doi:  
754 10.1073/pnas.0709069104
- 755 Carlsson M., Merten M., Kayser M., Isselstein J., Wrage-Mönnig N. (2017) Drought stress  
756 resistance and resilience of permanent grasslands are shaped by functional group  
757 composition and N fertilization. *Agriculture, Ecosystems & Environment* 236:52-60.  
758 doi: 10.1016/j.agee.2016.11.009

- 759 Clark A.T. et al. (2019) Predicting species abundances in a grassland biodiversity experiment:  
760 Trade-offs between model complexity and generality. *Journal of Ecology* 108:774-787.  
761 doi: 10.1111/1365-2745.13316
- 762 Craven D. et al. (2016) Plant diversity effects on grassland productivity are robust to both  
763 nutrient enrichment and drought. *Philosophical Transactions of the Royal Society B:*  
764 *Biological Sciences* 371:20150277. doi: 10.1098/rstb.2015.0277
- 765 Dai A.G., Zhao T.B., Chen J. (2018) Climate change and drought: a precipitation and  
766 evaporation perspective. *Current Climate Change Reports* 4:301-312. doi:  
767 10.1007/s40641-018-0101-6
- 768 Delgado-Baquerizo M. et al. (2020) The proportion of soil-borne pathogens increases with  
769 warming at the global scale. *Nature Climate Change* 10:550–554. doi: 10.1038/s41558-  
770 020-0759-3
- 771 Dietrich P., Cesarz S., Eisenhauer N., Roscher C. (2020) Effects of steam sterilization on soil  
772 abiotic and biotic properties. *Soil Organisms* 92:99–108. doi: 10.25674/so92iss2pp99
- 773 Dordas C. (2008) Role of nutrients in controlling plant diseases in sustainable agriculture. A  
774 review. *Agronomy for Sustainable Development* 28:33-46. doi: 10.1051/agro:2007051
- 775 Dornelas M. et al. (2014) Assemblage time series reveal biodiversity change but not systematic  
776 loss. *Science* 344:296-299. doi: 10.1126/science.1248484
- 777 Eisenhauer N. et al. (2019) Biotic interactions, community assembly, and eco-evolutionary  
778 dynamics as drivers of long-term biodiversity–ecosystem functioning relationships.  
779 *Research Ideas and Outcomes* 5:e47042. doi: 10.3897/rio.5.e47042
- 780 Eisenhauer N., Reich P.B., Scheu S. (2012) Increasing plant diversity effects on productivity  
781 with time due to delayed soil biota effects on plants. *Basic and Applied Ecology* 13:571-  
782 578. doi: 10.1016/j.baae.2012.09.002
- 783 Ellenberg H. (1988) *Vegetation ecology of Central Europe*, 4th edn. Cambridge University  
784 Press, Cambridge

- 785 Eziz A., Yan Z., Tian D., Han W., Tang Z., Fang J. (2017) Drought effect on plant biomass  
786 allocation: A meta-analysis. *Ecology and evolution* 7:11002-11010. doi:  
787 10.1002/ece3.3630
- 788 Fischer C. et al. (2019) Plant species richness and functional groups have different effects on  
789 soil water content in a decade-long grassland experiment. *Journal of Ecology* 107:127-  
790 141. doi: 10.1111/1365-2745.13046
- 791 Fry E.L., Johnson G.N., Hall A.L., Pritchard W.J., Bullock J.M., Bardgett R.D. (2018) Drought  
792 neutralises plant–soil feedback of two mesic grassland forbs. *Oecologia* 186:1113-1125.  
793 doi: 10.1007/s00442-018-4082-x
- 794 Guerrero-Ramírez N.R., Reich P.B., Wagg C., Ciobanu M., Eisenhauer N. (2019) Diversity-  
795 dependent plant–soil feedbacks underlie long-term plant diversity effects on primary  
796 productivity. *Ecosphere* 10:e02704. doi: 10.1002/ecs2.2704
- 797 Hahl T., van Moorsel S.J., Schmid M.W., Zuppinger-Dingley D., Schmid B., Wagg C. (2020)  
798 Plant responses to diversity-driven selection and associated rhizosphere microbial  
799 communities. *Functional Ecology*:707-722. doi: 10.1111/1365-2435.13511
- 800 Häußermann U., Bach M., Klement L., Breuer L. (2019) Stickstoff-Flächenbilanzen für  
801 Deutschland mit Regionalgliederung Bundesländer und Kreise—Jahre 1995 bis 2017;  
802 Methodik, Ergebnisse und Minderungsmaßnahmen. Abschlussbericht TEXTE  
803 131:2019
- 804 Hibberd J., Richardson P., Whitbread R., Farrar J. (1996) Effects of leaf age, basal meristem  
805 and infection with powdery mildew on photosynthesis in barley grown in 700  $\mu\text{mol}$   
806  $\text{mol}^{-1}\text{CO}_2$ . *New Phytologist* 134:317-325. doi: 10.1111/j.1469-8137.1996.tb04636.x
- 807 Holland E.A., Braswell B.H., Sulzman J., Lamarque J.-F. (2005) Nitrogen deposition onto the  
808 United States and Western Europe: synthesis of observations and models. *Ecological*  
809 *Applications* 15:38-57. doi: 10.1890/03-5162



- 810 Hothorn T. et al. (2016) Package ‘multcomp’. Simultaneous inference in general parametric  
811 models. Project for Statistical Computing, Vienna, Austria
- 812 in 't Zandt D., van den Brink A., de Kroon H., Visser E.J. (2019) Plant-soil feedback is shut  
813 down when nutrients come to town. *Plant and Soil* 439:541-551. doi: 10.1007/s11104-  
814 019-04050-9
- 815 Isbell F. et al. (2015) Biodiversity increases the resistance of ecosystem productivity to climate  
816 extremes. *Nature* 526:574-577. doi: 10.1038/nature15374
- 817 Jaballah S., Gribaa A., Volaire F., Ferchichi A. (2008) Ecophysiological responses of perennial  
818 grasses *Stipa lagascae* and *Dactylis glomerata* under soil water deficit. *Options*  
819 *Méditerranéennes Serie A* 79:303-307
- 820 Kaisermann A., de Vries F.T., Griffiths R.I., Bardgett R.D. (2017) Legacy effects of drought  
821 on plant–soil feedbacks and plant–plant interactions. *New Phytologist* 215:1413-1424.  
822 doi: 10.1111/nph.14661
- 823 Kocoń A., Staniak M. (2014) Productivity and gas exchange parameters of selected pasture  
824 grasses under drought stress. *Journal of Food, Agriculture and Environment* 12:131-135
- 825 Linhart Y.B. (1988) Intrapopulation differentiation in annual plants. III. The contrasting effects  
826 of intra-and interspecific competition. *Evolution* 42:1047-1064. doi: 10.1111/j.1558-  
827 5646.1988.tb02523.x
- 828 Lipowsky A., Schmid B., Roscher C. (2011) Selection for monoculture and mixture genotypes  
829 in a biodiversity experiment. *Basic and Applied Ecology* 12:360-371. doi:  
830 10.1016/j.baae.2011.03.005
- 831 Lorentzen S., Roscher C., Schumacher J., Schulze E.D., Schmid B. (2008) Species richness and  
832 identity affect the use of aboveground space in experimental grasslands. *Perspectives in*  
833 *Plant Ecology, Evolution and Systematics* 10:73-87. doi: 10.1016/j.ppees.2007.12.001

- 834 Lozano Y.M., Aguilar-Trigueros C.A., Flaig I.C., Rillig M.C. (2020) Root trait responses to  
835 drought are more heterogeneous than leaf trait responses. *Functional Ecology* 34:2224-  
836 2235. doi: 10.1111/1365-2435.13656
- 837 Mandal K., Saravanan R., Maiti S., Kothari I.L. (2009) Effect of downy mildew disease on  
838 photosynthesis and chlorophyll fluorescence in *Plantago ovata* Forsk. *Journal of Plant*  
839 *Diseases and Protection* 116:164-168. doi: 10.1007/Bf03356305
- 840 Marquard E. et al. (2009) Plant species richness and functional composition drive overyielding  
841 in a six-year grassland experiment. *Ecology* 90:3290-3302. doi: 10.1890/09-0069.1
- 842 Meyer S.T. et al. (2016) Effects of biodiversity strengthen over time as ecosystem functioning  
843 declines at low and increases at high biodiversity. *Ecosphere* 7:e01619. doi:  
844 10.1002/ecs2.1619
- 845 Mommer L. et al. (2018) Lost in diversity: the interactions between soil-borne fungi,  
846 biodiversity and plant productivity. *New Phytologist* 218:542-553. doi:  
847 10.1111/nph.15036
- 848 Pernilla Brinkman E., Van der Putten W.H., Bakker E.J., Verhoeven K.J. (2010) Plant–soil  
849 feedback: experimental approaches, statistical analyses and ecological interpretations.  
850 *Journal of Ecology* 98:1063-1073. doi: 10.1111/j.1365-2745.2010.01695.x
- 851 Pörtner H.O. et al. (2021) IPBES-IPCC co-sponsored workshop report on biodiversity and  
852 climate change; IPBES and IPCC. doi: 10.5281/zenodo.4782538.
- 853 Post D.M., Palkovacs E.P. (2009) Eco-evolutionary feedbacks in community and ecosystem  
854 ecology: interactions between the ecological theatre and the evolutionary play.  
855 *Philosophical Transactions of the Royal Society B: Biological Sciences* 364:1629-1640.  
856 doi: 10.1098/rstb.2009.0012
- 857 Pugnaire F.I. et al. (2019) Climate change effects on plant-soil feedbacks and consequences for  
858 biodiversity and functioning of terrestrial ecosystems. *Science advances* 5:eaaz1834.  
859 doi: 10.1126/sciadv.aaz1834

- 860 Reay D.S., Dentener F., Smith P., Grace J., Feely R.A. (2008) Global nitrogen deposition and  
861 carbon sinks. *Nature Geoscience* 1:430-437. doi: 10.1038/ngeo230
- 862 Reich P.B. et al. (2012) Impacts of biodiversity loss escalate through time as redundancy fades.  
863 *Science* 336:589-592. doi: 10.1126/science.1217909
- 864 Rillig M.C. et al. (2019) The role of multiple global change factors in driving soil functions and  
865 microbial biodiversity. *Science* 366:886-890. doi: 10.1126/science.aay2832
- 866 Rolando J.L., Ramirez D.A., Yactayo W., Monneveux P., Quiroz R. (2015) Leaf greenness as  
867 a drought tolerance related trait in potato (*Solanum tuberosum* L.). *Environmental and*  
868 *Experimental Botany* 110:27-35. doi: 10.1016/j.envexpbot.2014.09.006
- 869 Roscher C. et al. (2004) The role of biodiversity for element cycling and trophic interactions:  
870 an experimental approach in a grassland community. *Basic and Applied Ecology* 5:107-  
871 121. doi: 10.1078/1439-1791-00216
- 872 Roscher C., Schumacher J., Weisser W.W., Schmid B., Schulze E.D. (2007) Detecting the role  
873 of individual species for overyielding in experimental grassland communities composed  
874 of potentially dominant species. *Oecologia* 154:535-549. doi: 10.1007/s00442-007-  
875 0846-4
- 876 Ruosteenoja K., Markkanen T., Venalainen A., Raisanen P., Peltola H. (2018) Seasonal soil  
877 moisture and drought occurrence in Europe in CMIP5 projections for the 21st century.  
878 *Climate Dynamics* 50:1177-1192. doi: 10.1007/s00382-017-3671-4
- 879 Sage R.F. (2020) Global change biology: A primer. *Global Change Biology* 26:3-30. doi:  
880 10.1111/gcb.14893
- 881 Schnitzer S.A. et al. (2011) Soil microbes drive the classic plant diversity–productivity pattern.  
882 *Ecology* 92:296-303. doi: 10.1890/10-0773.1
- 883 Siebenkäs A., Schumacher J., Roscher C. (2015) Phenotypic plasticity to light and nutrient  
884 availability alters functional trait ranking across eight perennial grassland species. *AoB*  
885 *Plants* 7:plv029. doi: 10.1093/aobpla/plv029

- 886 terHorst C.P., Zee P.C. (2016) Eco-evolutionary dynamics in plant–soil feedbacks. *Functional*  
887 *Ecology* 30:1062-1072. doi: 10.1111/1365-2435.12671
- 888 Thakur M.P. et al. (2018) Reduced feeding activity of soil detritivores under warmer and drier  
889 conditions. *Nature Climate Change* 8:75-78. doi: 10.1038/s41558-017-0032-6
- 890 Thakur M.P. et al. (2021) Plant–soil feedbacks and temporal dynamics of plant diversity–  
891 productivity relationships. *Trends in Ecology & Evolution*. doi:  
892 10.1016/j.tree.2021.03.011
- 893 Tilman D., Reich P.B., Knops J.M. (2006) Biodiversity and ecosystem stability in a decade-  
894 long grassland experiment. *Nature* 441:629-632. doi: 10.1038/nature04742
- 895 Tylianakis J.M., Didham R.K., Bascompte J., Wardle D.A. (2008) Global change and species  
896 interactions in terrestrial ecosystems. *Ecology Letters* 11:1351-1363. doi:  
897 10.1111/j.1461-0248.2008.01250.x
- 898 van der Putten W.H., Bradford M.A., Pernilla Brinkman E., van de Voorde T.F., Veen G. (2016)  
899 Where, when and how plant–soil feedback matters in a changing world. *Functional*  
900 *Ecology* 30:1109-1121. doi: 10.1111/1365-2435.12657
- 901 van Moorsel S.J. et al. (2018a) Community evolution increases plant productivity at low  
902 diversity. *Ecology Letters* 21:128-137. doi: 10.1111/ele.12879
- 903 van Moorsel S.J., Schmid M.W., Hahl T., Zuppinger-Dingley D., Schmid B. (2018b) Selection  
904 in response to community diversity alters plant performance and functional traits.  
905 *Perspectives in Plant Ecology, Evolution and Systematics* 33:51-61. doi:  
906 10.1016/j.ppees.2018.05.002
- 907 Wei W. et al. (2018) Fertilizer N application rate impacts plant-soil feedback in a sanqi  
908 production system. *Science of the Total Environment* 633:796-807. doi:  
909 10.1016/j.scitotenv.2018.03.219

- 910 Weisser W.W. et al. (2017) Biodiversity effects on ecosystem functioning in a 15-year  
911 grassland experiment: Patterns, mechanisms, and open questions. *Basic and Applied*  
912 *Ecology* 23:1-73. doi: 10.1016/j.baae.2017.06.002
- 913 Wilschut R.A., van Kleunen M. (2021) Drought alters plant-soil feedback effects on biomass  
914 allocation but not on plant performance. *Plant and Soil* 462:285-296. doi:  
915 10.1007/s11104-021-04861-9
- 916 Xi N. et al. (2021) Relationships between plant-soil feedbacks and functional traits. *Journal of*  
917 *Ecology*. doi: 10.1111/1365-2745.13731
- 918 Yang G., Roy J., Veresoglou S.D., Rillig M.C. (2021) Soil biodiversity enhances the persistence  
919 of legumes under climate change. *New Phytologist* 229:2945-2956. doi:  
920 10.1111/nph.17065
- 921 Yang L., Maron J.L., Callaway R.M. (2015) Inhibitory effects of soil biota are ameliorated by  
922 high plant diversity. *Oecologia* 179:519-525. doi: 10.1007/s00442-015-3351-1
- 923 Zuppinger-Dingley D., Schmid B., Petermann J.S., Yadav V., De Deyn G.B., Flynn D.F. (2014)  
924 Selection for niche differentiation in plant communities increases biodiversity effects.  
925 *Nature* 515:108-111. doi: 10.1038/nature13869
- 926
- 927

928 **Appendix S1**

929 Journal: eLife

930 Article: Diversity-induced plant history and soil history effects modulate plant responses to  
931 global change

932 Authors: Peter Dietrich, Jens Schumacher, Nico Eisenhauer, Christiane Roscher

933 \*corresponding author: peter.dietrich@idiv.de

934

935 **Calculation of irrigation water quantity per pot**

936 1) After one week of growing, pots were watered until 100% saturation and then weighted (=  $Weight_{\text{wet soil}}$ ).

937  
938 2) To determine the amount of water, which is needed to get 60% water saturation (control  
939 value), we used the following equations:

940 (I) 
$$\frac{22\% \text{ (water holding capacity)} \times 60\% \text{ saturation}}{100\% \text{ saturation}} = 13.2\%$$

941 (II) 
$$Weight_{\text{wet soil}} - \frac{Weight_{\text{wet soil}} \times 100\% \text{ saturation}}{13.2\% + 100} = Weight_{\text{water control}}$$

942 First, we multiplied the water holding capacity of the Jena Experiment soil-sand mix (22%)  
943 times 60% saturation and then divided the result by 100% saturation. Second,  $Weight_{\text{wet soil}}$  was  
944 multiplied with 100 and then divided by 113.2. Third, the calculated weight for a 60% saturation  
945 was subtracted from  $Weight_{\text{wet soil}}$  per pot and averaged over all pots, which resulted in 380 ml  
946 water.

947 3) Drought was simulated by 50% lower water saturation (30% saturation), while the amount  
948 of water was calculated as followed:

949 (I) 
$$\frac{22\% \text{ (water holding capacity)} \times 30\% \text{ saturation}}{100\% \text{ saturation}} = 6.6\%$$

950 (II) 
$$Weight_{\text{wet soil}} - \frac{Weight_{\text{wet soil}} \times 100\% \text{ saturation}}{6.6\% + 100} = Weight_{\text{water drought}}$$

951 **Appendix S2**

952 Journal: eLife

953 Article: Diversity-induced plant history and soil history effects modulate plant responses to  
954 global change

955 Authors: Peter Dietrich, Jens Schumacher, Nico Eisenhauer, Christiane Roscher

956 \*corresponding author: peter.dietrich@idiv.de

957

958 *Hypothesis 2: global change drivers have a strong impact on biomass production and trait*  
959 *expression.*

960 Plant traits (separately for each species)

961 The grass *P. trivialis* was the only species which growth height decreased with drought, all  
962 other species showed no significant change under drought. Under nitrogen input, the species *P.*  
963 *trivialis*, *A. pratensis*, and *D. glomerata* (marginally significant) increased in growth height,  
964 while under the combined impact of both global change drivers, no species significantly  
965 changed in growth height (*D. glomerata* marginally significantly increased in height; Fig. S1).

966 The species *A. elatius*, *D. glomerata*, and *A. pratensis* increased in shoot nitrogen concentration  
967 and leaf greenness under the impact of drought and/or nitrogen input (similar to analysis across  
968 all species; Fig. S1). In *P. trivialis*, drought did not affect shoot nitrogen concentration or leaf  
969 greenness, and there was no additive impact of both global change drivers on leaf greenness  
970 (leaf greenness was as high as in fertilized plants; Fig. S1).

971 Global change drivers had no significant influence on LDMC or SLA of *A. elatius* and *A.*  
972 *pratensis* except for LDMC decrease and SLA increase of *A. elatius* plants when treated with  
973 both global change drivers (Fig. S2). Plants of *D. glomerata* decreased in LDMC and increased  
974 in SLA when treated with single global change drivers, while nitrogen input had a stronger  
975 impact than drought (Fig. S2). When treated with both global change drivers, *D. glomerata*  
976 plants had still a significantly lower LDMC and higher SLA compared to control plants. In *P.*  
977 *trivialis*, drought had no significant influence on LDMC and SLA, while nitrogen input

978 decreased LDMC and increased SLA (Fig. S2). When treated with both global change drivers,  
979 LDMC and SLA were as high as in fertilized plants.

980 In *D. glomerata*, stomatal conductance was increased, when plants were treated with drought,  
981 and in *A. pratensis* decreased, when treated with both global change drivers (Fig. S2). Stomatal  
982 conductance in *A. elatius* and *P. trivialis* did not change with global change treatments (Fig.  
983 S2).

984 In *A. elatius*, SRL decreased when fertilized, irrespective of drought, while other root traits did  
985 not change significantly (Fig. S3). In *A. pratensis*, drought, nitrogen input, and both global  
986 change drivers together had similar negative impacts on SRL and RLD (except for RLD under  
987 nitrogen input, which did not change; Fig. S3). Root diameter of *A. pratensis* plants increased  
988 under single global change drivers with additive effects under the combined application (Fig.  
989 S3). In *D. glomerata*, RLD increased and in *P. trivialis* RLD decreased and root diameter  
990 increased, when treated with both global change drivers (Fig. S3).



991 **Figures**

992

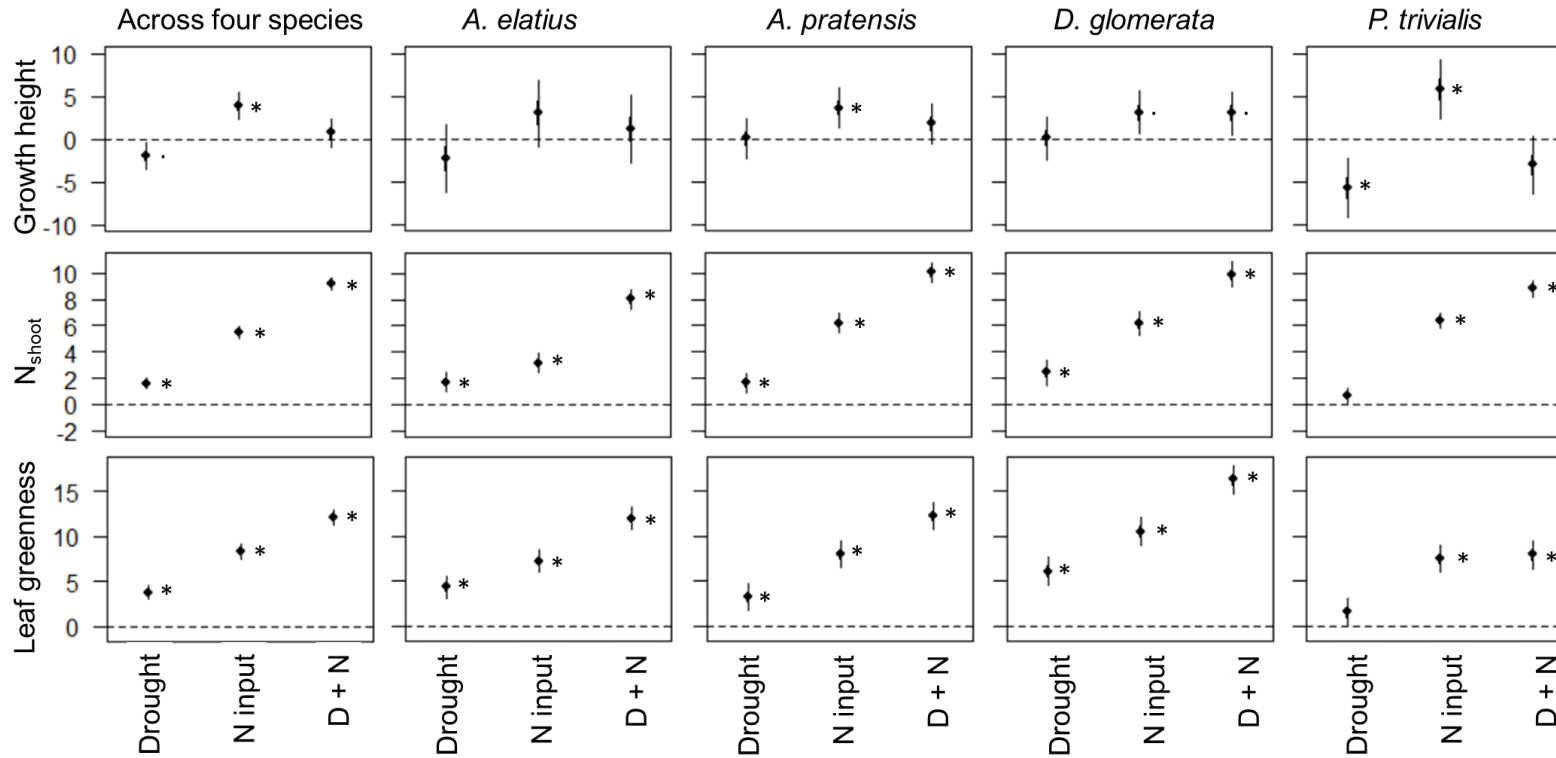

993

994 **Figure S1** Response of plants treated with drought, nitrogen input or a combination of both (D+N) relative to non-treated plants (control) for  
995 growth height, shoot nitrogen concentrations and leaf greenness across all four study species and separately for each species. Points are means and  
996 error bars are standard deviation. Stars indicate significant differences ( $P < 0.05$ ) between plants treated with GC driver and control plants.

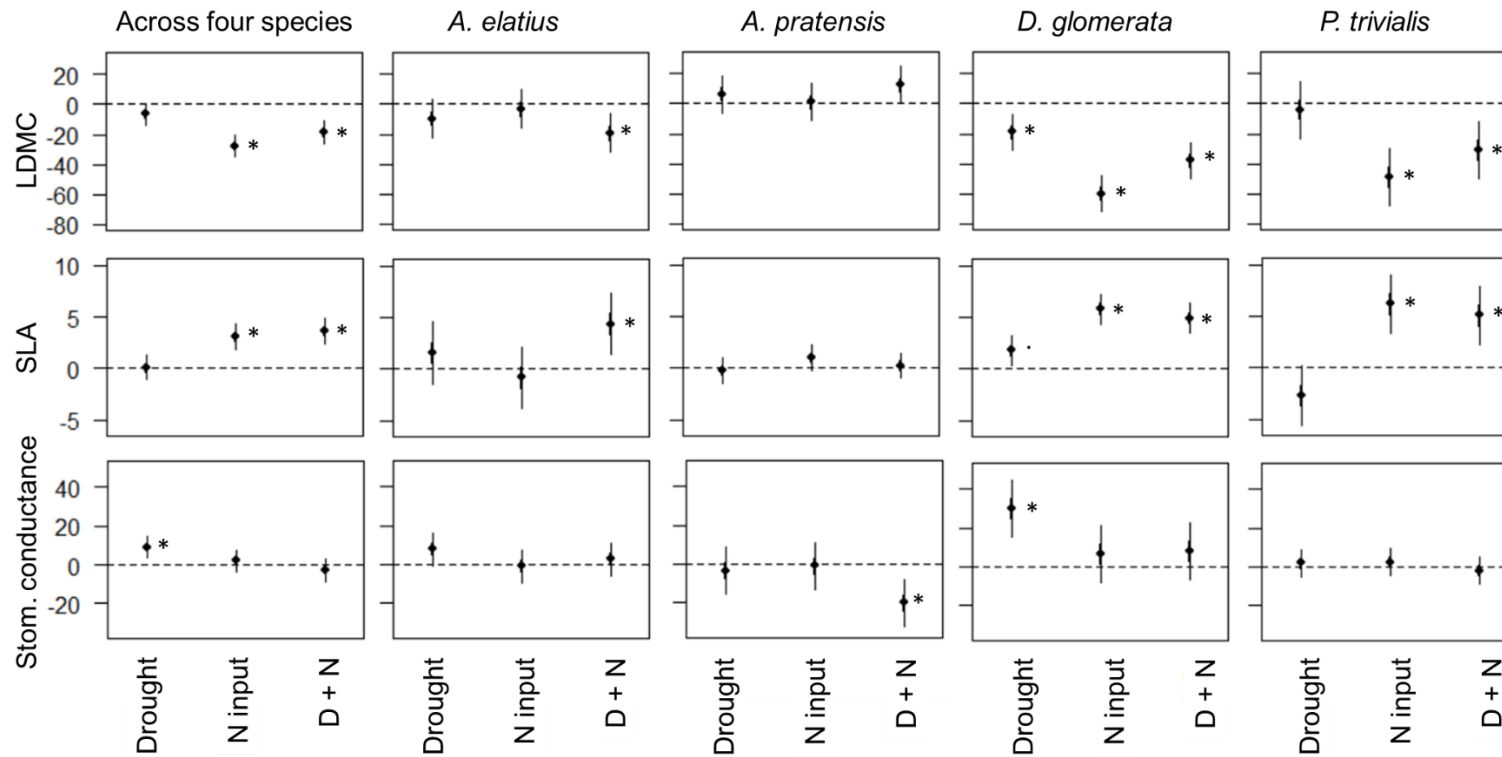

997

998 **Figure S2** Response of plants treated with drought, nitrogen input or a combination of both (D+N) relative to non-treated plants (control) for  
 999 LDMC, SLA and stomatal conductance across all four study species and separately for each species. Points are means and error bars are standard  
 1000 deviation. Stars indicate significant differences ( $P < 0.05$ ) between plants treated with GC driver and control plants.

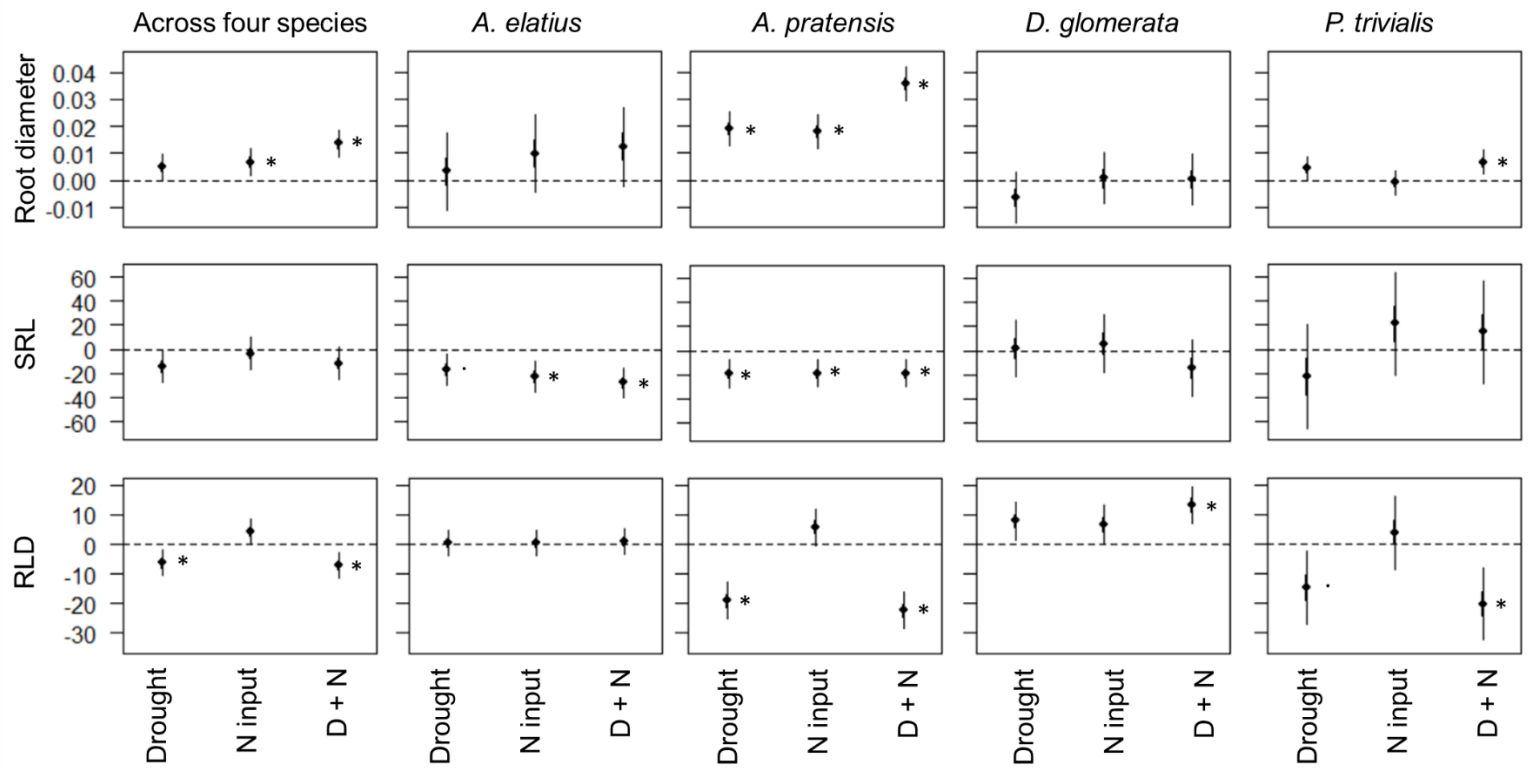

1001

1002 **Figure S3** Response of plants treated with drought, nitrogen input or a combination of both (D+N) relative to non-treated plants (control) for root  
 1003 diameter, SRL and RLD across all four study species and separately for each species. Points are means and error bars are standard deviation. Stars  
 1004 indicate significant differences ( $P < 0.05$ ) between plants treated with GC driver and control plants.

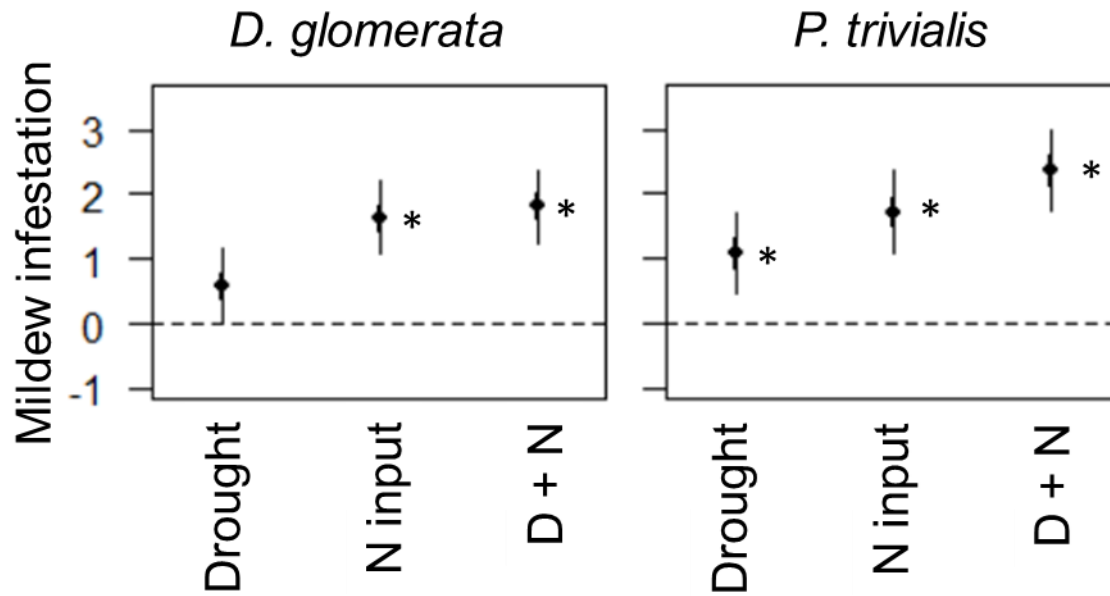

1005

1006 **Figure S4** Response of plants treated with drought, nitrogen input or a combination of both  
1007 (D+N) relative to non-treated plants (control) for mildew infestation for *D. glomerata* and *P.*  
1008 *trivialis*. Stars indicate significant differences ( $P < 0.05$ ) between plants treated with GC driver  
1009 and control plants.

1010 **Tables**

1011  
 1012 **Table S1** Summary of mixed-effect model analyses testing the effects of species identity (N = 4),  
 1013 legacy treatments (plant history, soil history, soil treatment), global change treatments (drought,  
 1014 nitrogen input) and their interactions on root-shoot ratio. Shown are degrees of freedom (Df), Chi<sup>2</sup>  
 1015 and P-values (P). Significant effects (P < 0.05) are given in bold, marginally significant effects (P <  
 1016 0.1) in italics.  
 1017

|                                     | Root-shoot ratio |                  |                  |
|-------------------------------------|------------------|------------------|------------------|
|                                     | Df               | Chi <sup>2</sup> | P                |
| Species identity (ID)               | 3                | 133.41           | <b>&lt;0.001</b> |
| Plant history                       | 1                | 1.11             | 0.292            |
| Soil history                        | 1                | 1.08             | 0.300            |
| Soil treatment                      | 2                | 1.81             | 0.404            |
| Drought (D)                         | 1                | 60.01            | <b>&lt;0.001</b> |
| Nitrogen input (N)                  | 1                | 89.83            | <b>&lt;0.001</b> |
| Species ID x Plant history          | 3                | 0.87             | 0.832            |
| Species ID x Soil history           | 3                | 4.07             | 0.254            |
| Species ID x Soil treatment         | 6                | 2.79             | 0.835            |
| Species ID x D                      | 3                | 95.53            | <b>&lt;0.001</b> |
| Species ID x N                      | 3                | 9.31             | <b>0.025</b>     |
| D x N                               | 1                | 2.19             | 0.139            |
| Species ID x Plant history x D      | 4                | 2.02             | 0.733            |
| Species ID x Soil history x D       | 4                | 1.58             | 0.812            |
| Species ID x Soil treatment x D     | 8                | 4.97             | 0.760            |
| Species ID x Plant history x N      | 4                | 2.91             | 0.573            |
| Species ID x Soil history x N       | 4                | 3.18             | 0.528            |
| Species ID x Soil treatment x N     | 8                | 18.18            | <b>0.020</b>     |
| Species ID x Plant history x D x N  | 4                | 10.42            | <b>0.034</b>     |
| Species ID x Soil history x D x N   | 4                | 11.14            | <b>0.025</b>     |
| Species ID x Soil treatment x D x N | 8                | 5.20             | 0.736            |

1018

1019 **Table S2** Summary of mixed-effect model analyses testing the effects of species identity (N = 4),  
 1020 legacy treatments (plant history, soil history, soil treatment), global change treatments (drought,  
 1021 nitrogen input) and their interactions on plant performance (total biomass, shoot biomass, root  
 1022 biomass and root-shoot ratio). Shown are degrees of freedom (Df), Chi<sup>2</sup> and P-values (P). Significant  
 1023 effects (P < 0.05) are given in bold, marginally significant effects (P < 0.1) in italics.  
 1024

|                        | Total biomass |        |                  | Shoot biomass |        |                  | Root biomass |        |                  | Root-shoot ratio |        |                  |
|------------------------|---------------|--------|------------------|---------------|--------|------------------|--------------|--------|------------------|------------------|--------|------------------|
|                        | Df            | Chi    | P                | Df            | Chi    | P                | Df           | Chi    | P                | Df               | Chi    | P                |
| Species ID             | 3             | 73.25  | <b>&lt;0.001</b> | 3             | 80.17  | <b>&lt;0.001</b> | 3            | 121.30 | <b>&lt;0.001</b> | 3                | 133.41 | <b>&lt;0.001</b> |
| Plant history          | 1             | 3.48   | <i>0.062</i>     | 1             | 1.36   | 0.244            | 1            | 3.40   | <i>0.065</i>     | 1                | 1.11   | 0.292            |
| Soil history           | 1             | 0.01   | 0.915            | 1             | 0.04   | 0.851            | 1            | 0.49   | 0.484            | 1                | 1.08   | 0.300            |
| Soil treatment         | 2             | 2.17   | 0.338            | 2             | 1.20   | 0.548            | 2            | 3.66   | 0.161            | 2                | 1.81   | 0.404            |
| Drought (D)            | 1             | 83.05  | <b>&lt;0.001</b> | 1             | 110.26 | <b>&lt;0.001</b> | 1            | 2.81   | <i>0.094</i>     | 1                | 60.01  | <b>&lt;0.001</b> |
| Nitrogen input (N)     | 1             | 257.26 | <b>&lt;0.001</b> | 1             | 425.93 | <b>&lt;0.001</b> | 1            | 15.89  | <b>&lt;0.001</b> | 1                | 89.83  | <b>&lt;0.001</b> |
| D x N                  | 1             | 29.23  | <b>&lt;0.001</b> | 1             | 23.02  | <b>&lt;0.001</b> | 1            | 8.50   | <b>0.004</b>     | 1                | 1.75   | 0.185            |
| Plant history x D      | 1             | 0.22   | 0.639            | 1             | 0.21   | 0.643            | 1            | 0.01   | 0.916            | 1                | <0.01  | 0.977            |
| Soil history x D       | 1             | <0.01  | 0.944            | 1             | 0.07   | 0.786            | 1            | 0.10   | 0.746            | 1                | 0.23   | 0.635            |
| Soil treatment x D     | 2             | 1.79   | 0.409            | 2             | 0.77   | 0.681            | 2            | 1.37   | 0.503            | 2                | 1.29   | 0.526            |
| Plant history x N      | 1             | 1.48   | 0.224            | 1             | 1.59   | 0.207            | 1            | 0.60   | 0.437            | 1                | 0.35   | 0.553            |
| Soil history x N       | 1             | 3.44   | <i>0.064</i>     | 1             | 1.33   | 0.249            | 1            | 2.46   | 0.116            | 1                | 0.83   | 0.363            |
| Soil treatment x N     | 2             | 1.43   | 0.489            | 2             | 1.40   | 0.496            | 2            | 0.43   | 0.806            | 2                | 0.49   | 0.782            |
| Plant history x D x N  | 1             | 2.12   | 0.146            | 1             | 0.84   | 0.358            | 1            | 1.78   | 0.183            | 1                | 1.27   | 0.260            |
| Soil history x D x N   | 1             | 0.95   | 0.330            | 1             | 2.78   | <i>0.095</i>     | 1            | 0.08   | 0.780            | 1                | 0.03   | 0.864            |
| Soil treatment x D x N | 2             | 1.37   | 0.504            | 2             | 1.93   | 0.381            | 2            | 0.91   | 0.635            | 2                | 0.73   | 0.693            |

1025

1026

1027 **Table S3** Summary of mixed-effect model analyses testing the effects of species identity (N = 4),  
 1028 legacy treatments (plant history, soil history, soil treatment), global change treatments (drought,  
 1029 nitrogen input) and their interactions on plant trait expression. Shown are degrees of freedom (Df),  
 1030 Chi<sup>2</sup> and P-values (P). Significant effects (P < 0.05) are given in bold, marginally significant effects  
 1031 (P < 0.1) in italics.  
 1032

|                        | Growth height |                  |                  | Shoot nitrogen conc. |                  |                  | Leaf greenness |                      |                  |  |
|------------------------|---------------|------------------|------------------|----------------------|------------------|------------------|----------------|----------------------|------------------|--|
|                        | Df            | Chi <sup>2</sup> | P                | Df                   | Chi <sup>2</sup> | P                | Df             | Chi <sup>2</sup>     | P                |  |
| Species ID             | 3             | 71.45            | <b>&lt;0.001</b> | 3                    | 57.20            | <b>&lt;0.001</b> | 3              | 79.55                | <b>&lt;0.001</b> |  |
| Plant history          | 1             | 0.15             | 0.694            | 1                    | <0.01            | 0.960            | 1              | 0.05                 | 0.830            |  |
| Soil history           | 1             | 1.60             | 0.207            | 1                    | 0.64             | 0.425            | 1              | 0.17                 | 0.683            |  |
| Soil treatment         | 2             | 3.98             | 0.137            | 2                    | 2.27             | 0.321            | 2              | 0.60                 | 0.742            |  |
| Drought (D)            | 1             | 18.71            | <b>&lt;0.001</b> | 1                    | 65.46            | <b>&lt;0.001</b> | 1              | 66.15                | <b>&lt;0.001</b> |  |
| Nitrogen input (N)     | 1             | 32.93            | <b>&lt;0.001</b> | 1                    | 772.20           | <b>&lt;0.001</b> | 1              | 523.86               | <b>&lt;0.001</b> |  |
| D x N                  | 1             | 1.10             | 0.294            | 1                    | 48.85            | <b>&lt;0.001</b> | 1              | <0.01                | 0.997            |  |
| Plant history x D      | 1             | 2.99             | <i>0.084</i>     | 1                    | 0.06             | 0.806            | 1              | <0.01                | 0.950            |  |
| Soil history x D       | 1             | 0.51             | 0.477            | 1                    | 0.11             | 0.735            | 1              | 1.57                 | 0.210            |  |
| Soil treatment x D     | 2             | 3.54             | 0.171            | 2                    | 0.02             | 0.990            | 2              | 0.69                 | 0.707            |  |
| Plant history x N      | 1             | 0.50             | 0.478            | 1                    | 1.34             | 0.246            | 1              | 0.91                 | 0.341            |  |
| Soil history x N       | 1             | 1.41             | 0.235            | 1                    | 0.19             | 0.666            | 1              | 1.54                 | 0.215            |  |
| Soil treatment x N     | 2             | 1.87             | 0.392            | 2                    | 3.30             | 0.192            | 2              | 2.42                 | 0.299            |  |
| Plant history x D x N  | 1             | 0.83             | 0.364            | 1                    | 0.21             | 0.645            | 1              | 0.79                 | 0.373            |  |
| Soil history x D x N   | 1             | 0.69             | 0.407            | 1                    | 3.06             | <i>0.080</i>     | 1              | <0.01                | 0.977            |  |
| Soil treatment x D x N | 2             | 4.94             | <i>0.085</i>     | 2                    | 1.56             | 0.458            | 2              | 0.04                 | 0.983            |  |
|                        |               | LDMC             |                  |                      | SLA              |                  |                | Stomatal conductance |                  |  |
|                        | Df            | Chi <sup>2</sup> | P                | Df                   | Chi <sup>2</sup> | P                | Df             | Chi <sup>2</sup>     | P                |  |
| Air temperature        | -             | -                | -                | -                    | -                | -                | 1              | 5.34                 | <b>0.021</b>     |  |
| Daytime                | -             | -                | -                | -                    | -                | -                | 1              | 38.25                | <b>&lt;0.001</b> |  |
| Species ID             | 3             | 80.52            | <b>&lt;0.001</b> | 3                    | 124.00           | <b>&lt;0.001</b> | 3              | 47.15                | <b>&lt;0.001</b> |  |
| Plant history          | 1             | 0.80             | 0.373            | 1                    | 0.06             | 0.805            | 1              | 1.25                 | 0.264            |  |
| Soil history           | 1             | 0.10             | 0.750            | 1                    | 1.22             | 0.270            | 1              | 0.37                 | 0.543            |  |
| Soil treatment         | 2             | 1.13             | 0.570            | 2                    | 1.64             | 0.441            | 2              | 3.38                 | 0.185            |  |
| Drought (D)            | 1             | 0.94             | 0.333            | 1                    | 0.11             | 0.743            | 1              | 0.90                 | 0.343            |  |
| Nitrogen input (N)     | 1             | 62.84            | <b>&lt;0.001</b> | 1                    | 61.63            | <b>&lt;0.001</b> | 1              | 8.16                 | <b>0.004</b>     |  |
| D x N                  | 1             | 6.69             | <b>0.010</b>     | 1                    | 0.01             | 0.904            | 1              | 9.33                 | <b>0.002</b>     |  |
| Plant history x D      | 1             | 0.04             | 0.841            | 1                    | 0.34             | 0.559            | 1              | 0.06                 | 0.806            |  |
| Soil history x D       | 1             | 0.49             | 0.484            | 1                    | 0.02             | 0.883            | 1              | 0.65                 | 0.420            |  |
| Soil treatment x D     | 2             | 0.24             | 0.887            | 2                    | 0.23             | 0.889            | 2              | 0.18                 | 0.914            |  |
| Plant history x N      | 1             | 0.65             | 0.421            | 1                    | 0.16             | 0.688            | 1              | 0.69                 | 0.406            |  |
| Soil history x N       | 1             | 0.12             | 0.734            | 1                    | 1.07             | 0.300            | 1              | 0.63                 | 0.428            |  |
| Soil treatment x N     | 2             | 0.66             | 0.719            | 2                    | 2.92             | 0.232            | 2              | 0.08                 | 0.960            |  |
| Plant history x D x N  | 1             | 0.16             | 0.687            | 1                    | 1.77             | 0.183            | 1              | 0.87                 | 0.351            |  |
| Soil history x D x N   | 1             | <0.01            | 0.962            | 1                    | 0.95             | 0.331            | 1              | 0.02                 | 0.887            |  |
| Soil treatment x D x N | 2             | 2.27             | 0.322            | 2                    | 1.33             | 0.514            | 2              | 3.73                 | 0.155            |  |
|                        |               | Root diameter    |                  |                      | SRL              |                  |                | RLD                  |                  |  |
|                        | Df            | Chi <sup>2</sup> | P                | Df                   | Chi <sup>2</sup> | P                | Df             | Chi <sup>2</sup>     | P                |  |
| Species ID             | 3             | 165.58           | <b>&lt;0.001</b> | 3                    | 174.84           | <b>&lt;0.001</b> | 3              | 125.84               | <b>&lt;0.001</b> |  |
| Plant history          | 1             | 0.03             | 0.872            | 1                    | 0.32             | 0.569            | 1              | 1.14                 | 0.286            |  |
| Soil history           | 1             | 0.37             | 0.544            | 1                    | 0.36             | 0.546            | 1              | 0.25                 | 0.617            |  |
| Soil treatment         | 2             | 1.50             | 0.473            | 2                    | 2.80             | 0.246            | 2              | 4.97                 | <i>0.083</i>     |  |
| Drought (D)            | 1             | 11.19            | <b>0.001</b>     | 1                    | 7.67             | <b>0.006</b>     | 1              | 16.09                | <b>&lt;0.001</b> |  |
| Nitrogen input (N)     | 1             | 19.83            | <b>&lt;0.001</b> | 1                    | 6.68             | <b>0.010</b>     | 1              | 1.29                 | 0.257            |  |
| D x N                  | 1             | 0.25             | 0.619            | 1                    | 1.27             | 0.261            | 1              | 2.14                 | 0.144            |  |
| Plant history x D      | 1             | 0.37             | 0.544            | 1                    | 0.34             | 0.559            | 1              | 0.67                 | 0.414            |  |
| Soil history x D       | 1             | 0.12             | 0.725            | 1                    | 0.48             | 0.491            | 1              | 0.07                 | 0.798            |  |
| Soil treatment x D     | 2             | 1.67             | 0.434            | 2                    | 0.65             | 0.723            | 2              | 0.44                 | 0.802            |  |
| Plant history x N      | 1             | 0.40             | 0.528            | 1                    | 1.91             | 0.167            | 1              | <0.01                | 0.944            |  |
| Soil history x N       | 1             | 0.42             | 0.515            | 1                    | 0.15             | 0.703            | 1              | 0.86                 | 0.353            |  |
| Soil treatment x N     | 2             | 0.27             | 0.872            | 2                    | 1.69             | 0.430            | 2              | 0.08                 | 0.959            |  |
| Plant history x D x N  | 1             | 0.20             | 0.652            | 1                    | 1.22             | 0.270            | 1              | 0.12                 | 0.734            |  |
| Soil history x D x N   | 1             | 1.48             | 0.224            | 1                    | 3.47             | <i>0.063</i>     | 1              | 3.94                 | <b>0.047</b>     |  |
| Soil treatment x D x N | 2             | 0.75             | 0.686            | 2                    | 0.84             | 0.659            | 2              | 1.02                 | 0.600            |  |

1033 **Table S4** Summary of mixed-effect model analyses testing the effects legacy treatments (plant  
 1034 history, soil history, soil treatment), global change treatments (drought, nitrogen input) and their  
 1035 interactions on plant performance (total biomass, shoot biomass, root biomass and root-shoot ratio)  
 1036 of *A. elatius* and *A. pratensis*. Shown are degrees of freedom (Df), Chi<sup>2</sup> and P-values (P). Significant  
 1037 effects (P < 0.05) are given in bold, marginally significant effects (P < 0.1) in italics.  
 1038

|                        | <i>A. elatius</i> |                  |                  |               |                  |                  |              |                  |                  |                  |                  |                  |
|------------------------|-------------------|------------------|------------------|---------------|------------------|------------------|--------------|------------------|------------------|------------------|------------------|------------------|
|                        | Total biomass     |                  |                  | Shoot biomass |                  |                  | Root biomass |                  |                  | Root-shoot ratio |                  |                  |
|                        | Df                | Chi <sup>2</sup> | P                | Df            | Chi <sup>2</sup> | P                | Df           | Chi <sup>2</sup> | P                | Df               | Chi <sup>2</sup> | P                |
| Plant history          | 1                 | 0.26             | 0.609            | 1             | 0.05             | 0.827            | 1            | 0.10             | 0.747            | 1                | 0.11             | 0.738            |
| Soil history           | 1                 | 0.39             | 0.533            | 1             | 0.03             | 0.865            | 1            | 1.02             | 0.312            | 1                | 1.28             | 0.258            |
| Soil treatment         | 2                 | 2.06             | 0.357            | 2             | 1.59             | 0.452            | 2            | 1.31             | 0.520            | 2                | 0.30             | 0.861            |
| Drought (D)            | 1                 | 21.54            | <b>&lt;0.001</b> | 1             | 50.79            | <b>&lt;0.001</b> | 1            | 6.13             | <b>0.013</b>     | 1                | 67.84            | <b>&lt;0.001</b> |
| Nitrogen input (N)     | 1                 | 125.48           | <b>&lt;0.001</b> | 1             | 128.72           | <b>&lt;0.001</b> | 1            | 31.68            | <b>&lt;0.001</b> | 1                | 13.70            | <b>&lt;0.001</b> |
| D x N                  | 1                 | 36.23            | <b>&lt;0.001</b> | 1             | 45.06            | <b>&lt;0.001</b> | 1            | 1.86             | 0.173            | 1                | 0.13             | 0.715            |
| Plant history x D      | 1                 | 1.01             | 0.315            | 1             | 2.37             | 0.123            | 1            | 0.05             | 0.823            | 1                | 1.28             | 0.258            |
| Soil history x D       | 1                 | 0.27             | 0.606            | 1             | 2.01             | 0.156            | 1            | 0.71             | 0.399            | 1                | 2.11             | 0.146            |
| Soil treatment x D     | 2                 | 1.21             | 0.545            | 2             | 3.22             | 0.200            | 2            | 0.13             | 0.939            | 2                | 1.21             | 0.545            |
| Plant history x N      | 1                 | 0.92             | 0.337            | 1             | 2.00             | 0.157            | 1            | 0.02             | 0.879            | 1                | 0.46             | 0.497            |
| Soil history x N       | 1                 | 0.87             | 0.352            | 1             | 0.05             | 0.832            | 1            | 1.37             | 0.242            | 1                | 2.29             | 0.130            |
| Soil treatment x N     | 2                 | 3.07             | 0.215            | 2             | 0.80             | 0.669            | 2            | 6.25             | <b>0.044</b>     | 2                | 5.64             | 0.060            |
| Plant history x D x N  | 1                 | 0.07             | 0.792            | 1             | <0.01            | 0.980            | 1            | 0.15             | 0.696            | 1                | 0.02             | 0.884            |
| Soil history x D x N   | 1                 | 0.61             | 0.434            | 1             | 0.05             | 0.822            | 1            | 0.89             | 0.344            | 1                | 1.17             | 0.279            |
| Soil treatment x D x N | 2                 | 3.61             | 0.165            | 2             | 2.25             | 0.326            | 2            | 1.33             | 0.515            | 2                | 0.56             | 0.757            |

  

|                        | <i>A. pratensis</i> |                  |                  |               |                  |                  |              |                  |                  |                  |                  |                  |
|------------------------|---------------------|------------------|------------------|---------------|------------------|------------------|--------------|------------------|------------------|------------------|------------------|------------------|
|                        | Total biomass       |                  |                  | Shoot biomass |                  |                  | Root biomass |                  |                  | Root-shoot ratio |                  |                  |
|                        | Df                  | Chi <sup>2</sup> | P                | Df            | Chi <sup>2</sup> | P                | Df           | Chi <sup>2</sup> | P                | Df               | Chi <sup>2</sup> | P                |
| Plant history          | 1                   | 0.57             | 0.452            | 1             | 0.42             | 0.518            | 1            | 0.43             | 0.512            | 1                | <0.01            | 0.985            |
| Soil history           | 1                   | 0.68             | 0.408            | 1             | <0.01            | 0.945            | 1            | 1.47             | 0.225            | 1                | 0.80             | 0.371            |
| Soil treatment         | 2                   | 0.34             | 0.845            | 2             | 0.29             | 0.865            | 2            | 0.23             | 0.892            | 2                | 0.07             | 0.967            |
| Drought (D)            | 1                   | 71.43            | <b>&lt;0.001</b> | 1             | 38.06            | <b>&lt;0.001</b> | 1            | 60.92            | <b>&lt;0.001</b> | 1                | 0.15             | 0.696            |
| Nitrogen input (N)     | 1                   | 74.74            | <b>&lt;0.001</b> | 1             | 162.92           | <b>&lt;0.001</b> | 1            | 9.71             | <b>0.002</b>     | 1                | 55.50            | <b>&lt;0.001</b> |
| D x N                  | 1                   | 26.47            | <b>&lt;0.001</b> | 1             | 3.98             | <b>0.046</b>     | 1            | 24.94            | <b>&lt;0.001</b> | 1                | 16.49            | <b>&lt;0.001</b> |
| Plant history x D      | 1                   | 0.08             | 0.772            | 1             | 0.51             | 0.477            | 1            | 0.48             | 0.488            | 1                | 1.07             | 0.301            |
| Soil history x D       | 1                   | 0.43             | 0.512            | 1             | 0.37             | 0.546            | 1            | 0.20             | 0.653            | 1                | 0.01             | 0.912            |
| Soil treatment x D     | 2                   | 1.17             | 0.557            | 2             | 0.19             | 0.911            | 2            | 2.12             | 0.346            | 2                | 3.60             | 0.165            |
| Plant history x N      | 1                   | 0.40             | 0.529            | 1             | 1.26             | 0.261            | 1            | 0.02             | 0.875            | 1                | 0.14             | 0.709            |
| Soil history x N       | 1                   | 5.45             | <b>0.020</b>     | 1             | 1.19             | 0.275            | 1            | 4.53             | <b>0.033</b>     | 1                | 1.24             | 0.265            |
| Soil treatment x N     | 2                   | 2.78             | 0.249            | 2             | 2.50             | 0.287            | 2            | 1.21             | 0.547            | 2                | 0.13             | 0.938            |
| Plant history x D x N  | 1                   | 0.55             | 0.458            | 1             | 0.02             | 0.881            | 1            | 0.59             | 0.442            | 1                | 0.08             | 0.771            |
| Soil history x D x N   | 1                   | 0.28             | 0.595            | 1             | 0.30             | 0.585            | 1            | 0.78             | 0.376            | 1                | 1.44             | 0.230            |
| Soil treatment x D x N | 2                   | 0.91             | 0.634            | 2             | 0.05             | 0.975            | 2            | 1.45             | 0.485            | 2                | 2.41             | 0.300            |

1039

1040



1041 **Table S5** Summary of mixed-effect model analyses testing the effects legacy treatments (plant  
 1042 history, soil history, soil treatment), global change treatments (drought, nitrogen input) and their  
 1043 interactions on plant performance (total biomass, shoot biomass, root biomass and root-shoot ratio)  
 1044 of *D. glomerata* and *P. trivialis*. Shown are degrees of freedom (Df), Chi<sup>2</sup> and P-values (P).  
 1045 Significant effects (P < 0.05) are given in bold, marginally significant effects (P < 0.1) in italics.  
 1046

|                        | <i>D. glomerata</i> |                  |                  |               |                  |                  |              |                  |                  |                  |                  |                  |
|------------------------|---------------------|------------------|------------------|---------------|------------------|------------------|--------------|------------------|------------------|------------------|------------------|------------------|
|                        | Total biomass       |                  |                  | Shoot biomass |                  |                  | Root biomass |                  |                  | Root-shoot ratio |                  |                  |
|                        | Df                  | Chi <sup>2</sup> | P                | Df            | Chi <sup>2</sup> | P                | Df           | Chi <sup>2</sup> | P                | Df               | Chi <sup>2</sup> | P                |
| Plant history          | 1                   | 1.51             | 0.219            | 1             | 1.32             | 0.251            | 1            | 1.12             | 0.289            | 1                | 0.19             | 0.662            |
| Soil history           | 1                   | 0.00             | 0.957            | 1             | 0.01             | 0.912            | 1            | 0.07             | 0.787            | 1                | 0.05             | 0.829            |
| Soil treatment         | 2                   | 0.79             | 0.673            | 2             | 0.11             | 0.948            | 2            | 2.65             | 0.266            | 2                | 2.94             | 0.230            |
| Drought (D)            | 1                   | 0.98             | 0.323            | 1             | 12.71            | <b>&lt;0.001</b> | 1            | 20.48            | <b>&lt;0.001</b> | 1                | 58.54            | <b>&lt;0.001</b> |
| Nitrogen input (N)     | 1                   | 82.06            | <b>&lt;0.001</b> | 1             | 124.42           | <b>&lt;0.001</b> | 1            | 8.87             | <b>0.003</b>     | 1                | 16.79            | <b>&lt;0.001</b> |
| D x N                  | 1                   | 0.07             | 0.790            | 1             | 0.04             | 0.843            | 1            | 0.61             | 0.434            | 1                | 0.53             | 0.467            |
| Plant history x D      | 1                   | 0.05             | 0.821            | 1             | 0.55             | 0.458            | 1            | 0.24             | 0.623            | 1                | 1.40             | 0.236            |
| Soil history x D       | 1                   | 0.56             | 0.453            | 1             | 2.20             | 0.138            | 1            | 0.14             | 0.706            | 1                | 0.27             | 0.601            |
| Soil treatment x D     | 2                   | 0.09             | 0.955            | 2             | 0.55             | 0.758            | 2            | 1.09             | 0.579            | 2                | 3.01             | 0.222            |
| Plant history x N      | 1                   | 1.55             | 0.213            | 1             | 1.85             | 0.174            | 1            | 0.62             | 0.432            | 1                | 0.29             | 0.592            |
| Soil history x N       | 1                   | 1.42             | 0.234            | 1             | 2.24             | 0.135            | 1            | 0.26             | 0.612            | 1                | 0.25             | 0.618            |
| Soil treatment x N     | 2                   | 0.05             | 0.976            | 2             | 0.72             | 0.699            | 2            | 1.94             | 0.378            | 2                | 3.83             | 0.147            |
| Plant history x D x N  | 1                   | 4.64             | <b>0.031</b>     | 1             | 3.35             | 0.067            | 1            | 4.09             | <b>0.043</b>     | 1                | 3.81             | 0.051            |
| Soil history x D x N   | 1                   | 4.21             | <b>0.040</b>     | 1             | 3.68             | 0.055            | 1            | 2.87             | 0.090            | 1                | 1.64             | 0.200            |
| Soil treatment x D x N | 2                   | 1.70             | 0.428            | 2             | 3.03             | 0.220            | 2            | 0.66             | 0.718            | 2                | 0.32             | 0.853            |

  

|                        | <i>P. trivialis</i> |                  |                  |               |                  |                  |              |                  |              |                  |                  |                  |
|------------------------|---------------------|------------------|------------------|---------------|------------------|------------------|--------------|------------------|--------------|------------------|------------------|------------------|
|                        | Total biomass       |                  |                  | Shoot biomass |                  |                  | Root biomass |                  |              | Root-shoot ratio |                  |                  |
|                        | Df                  | Chi <sup>2</sup> | P                | Df            | Chi <sup>2</sup> | P                | Df           | Chi <sup>2</sup> | P            | Df               | Chi <sup>2</sup> | P                |
| Plant history          | 1                   | 0.91             | 0.340            | 1             | 0.03             | 0.870            | 1            | 1.49             | 0.222        | 1                | 1.36             | 0.244            |
| Soil history           | 1                   | 0.26             | 0.611            | 1             | 0.08             | 0.781            | 1            | 2.43             | 0.119        | 1                | 4.29             | <b>0.038</b>     |
| Soil treatment         | 2                   | 1.23             | 0.540            | 2             | 1.18             | 0.556            | 2            | 0.62             | 0.732        | 2                | 0.09             | 0.956            |
| Drought (D)            | 1                   | 23.05            | <b>&lt;0.001</b> | 1             | 22.42            | <b>&lt;0.001</b> | 1            | 8.93             | <b>0.003</b> | 1                | 0.00             | 0.988            |
| Nitrogen input (N)     | 1                   | 27.28            | <b>&lt;0.001</b> | 1             | 87.31            | <b>&lt;0.001</b> | 1            | 1.12             | 0.290        | 1                | 45.86            | <b>&lt;0.001</b> |
| D x N                  | 1                   | 3.81             | 0.051            | 1             | 2.16             | 0.141            | 1            | 2.81             | 0.094        | 1                | 2.10             | 0.147            |
| Plant history x D      | 1                   | 0.08             | 0.775            | 1             | 1.03             | 0.311            | 1            | 0.03             | 0.874        | 1                | 0.20             | 0.656            |
| Soil history x D       | 1                   | <0.01            | 0.969            | 1             | 0.21             | 0.649            | 1            | 0.15             | 0.696        | 1                | 0.21             | 0.646            |
| Soil treatment x D     | 2                   | 0.80             | 0.670            | 2             | 0.69             | 0.708            | 2            | 0.38             | 0.828        | 2                | 1.04             | 0.594            |
| Plant history x N      | 1                   | <0.01            | 0.972            | 1             | 0.87             | 0.350            | 1            | 0.32             | 0.569        | 1                | 0.73             | 0.391            |
| Soil history x N       | 1                   | <0.01            | 0.984            | 1             | 0.01             | 0.936            | 1            | 0.01             | 0.920        | 1                | 0.03             | 0.857            |
| Soil treatment x N     | 2                   | 4.20             | 0.123            | 2             | 1.87             | 0.392            | 2            | 6.33             | <b>0.042</b> | 2                | 7.28             | <b>0.026</b>     |
| Plant history x D x N  | 1                   | 0.25             | 0.614            | 1             | <0.01            | 0.978            | 1            | 0.17             | 0.680        | 1                | 0.00             | 0.972            |
| Soil history x D x N   | 1                   | 0.02             | 0.890            | 1             | 1.11             | 0.292            | 1            | 1.09             | 0.296        | 1                | 2.88             | 0.089            |
| Soil treatment x D x N | 2                   | 0.35             | 0.838            | 2             | 0.49             | 0.782            | 2            | 1.16             | 0.559        | 2                | 1.97             | 0.373            |

1047

1048

1049 **Table S6** Summary of mixed-effect model analyses testing the effects of legacy treatments (plant  
 1050 history, soil history, soil treatment), global change treatments (drought, nitrogen input) and their  
 1051 interactions on plant trait expressions of *A. elatius*. Shown are degrees of freedom (Df), Chi<sup>2</sup> and P-  
 1052 values (P). Significant effects (P < 0.05) are given in bold, marginally significant effects (P < 0.1) in  
 1053 italics.  
 1054

| <i>A. elatius</i>      | Growth height |                  |              | Shoot nitrogen conc. |                  |                  | Leaf greenness       |                  |                  |
|------------------------|---------------|------------------|--------------|----------------------|------------------|------------------|----------------------|------------------|------------------|
|                        | Df            | Chi <sup>2</sup> | P            | Df                   | Chi <sup>2</sup> | P                | Df                   | Chi <sup>2</sup> | P                |
| Plant history          | 1             | 0.24             | 0.625        | 1                    | 0.12             | 0.725            | 1                    | 0.07             | 0.795            |
| Soil history           | 1             | 0.61             | 0.436        | 1                    | 0.36             | 0.547            | 1                    | 0.67             | 0.413            |
| Soil treatment         | 2             | 2.01             | 0.365        | 2                    | 0.80             | 0.670            | 2                    | 0.19             | 0.907            |
| Drought (D)            | 1             | 2.11             | 0.146        | 1                    | 36.64            | <b>&lt;0.001</b> | 1                    | 30.19            | <b>&lt;0.001</b> |
| Nitrogen input (N)     | 1             | 5.35             | <b>0.021</b> | 1                    | 142.97           | <b>&lt;0.001</b> | 1                    | 153.54           | <b>&lt;0.001</b> |
| D x N                  | 1             | 0.02             | 0.881        | 1                    | 32.71            | <b>&lt;0.001</b> | 1                    | 0.27             | 0.604            |
| Plant history x D      | 1             | 4.68             | <b>0.030</b> | 1                    | 1.41             | 0.236            | 1                    | 0.48             | 0.487            |
| Soil history x D       | 1             | 0.01             | 0.904        | 1                    | 0.26             | 0.612            | 1                    | 0.06             | 0.813            |
| Soil treatment x D     | 2             | 3.10             | 0.212        | 2                    | 0.38             | 0.827            | 2                    | 1.58             | 0.453            |
| Plant history x N      | 1             | 1.15             | 0.284        | 1                    | 1.08             | 0.300            | 1                    | 3.76             | 0.053            |
| Soil history x N       | 1             | 0.61             | 0.434        | 1                    | 0.20             | 0.656            | 1                    | 1.09             | 0.295            |
| Soil treatment x N     | 2             | 3.03             | 0.220        | 2                    | 0.27             | 0.874            | 2                    | 2.37             | 0.305            |
| Plant history x D x N  | 1             | 0.59             | 0.443        | 1                    | 1.85             | 0.174            | 1                    | 0.37             | 0.545            |
| Soil history x D x N   | 1             | 0.93             | 0.334        | 1                    | 0.03             | 0.854            | 1                    | 0.06             | 0.813            |
| Soil treatment x D x N | 2             | 7.64             | <b>0.022</b> | 2                    | 0.26             | 0.877            | 2                    | 1.95             | 0.377            |
|                        | LDMC          |                  |              | SLA                  |                  |                  | Stomatal conductance |                  |                  |
|                        | Df            | Chi <sup>2</sup> | P            | Df                   | Chi <sup>2</sup> | P                | Df                   | Chi <sup>2</sup> | P                |
| Air temperature        | -             | -                | -            | -                    | -                | -                | 1                    | <0.01            | 0.948            |
| Daytime                | -             | -                | -            | -                    | -                | -                | 1                    | 8.05             | <b>0.005</b>     |
| Plant history          | 1             | 0.46             | 0.500        | 5                    | 1.69             | 0.194            | 1                    | 0.49             | 0.486            |
| Soil history           | 1             | 0.19             | 0.666        | 6                    | 1.83             | 0.176            | 1                    | 0.05             | 0.823            |
| Soil treatment         | 2             | 1.37             | 0.504        | 8                    | 1.14             | 0.565            | 2                    | 3.38             | 0.184            |
| Drought (D)            | 1             | 7.57             | <b>0.006</b> | 9                    | 12.37            | <b>&lt;0.001</b> | 1                    | 4.58             | <b>0.032</b>     |
| Nitrogen input (N)     | 1             | 1.05             | 0.307        | 10                   | 0.05             | 0.832            | 1                    | 2.00             | 0.158            |
| D x N                  | 1             | 0.02             | 0.889        | 11                   | 1.87             | 0.171            | 1                    | 0.17             | 0.681            |
| Plant history x D      | 1             | 1.48             | 0.224        | 12                   | 1.94             | 0.164            | 1                    | 1.08             | 0.298            |
| Soil history x D       | 1             | 0.36             | 0.549        | 13                   | 0.79             | 0.373            | 1                    | 0.05             | 0.830            |
| Soil treatment x D     | 2             | <0.01            | 0.998        | 15                   | 1.73             | 0.420            | 2                    | 0.73             | 0.693            |
| Plant history x N      | 1             | 0.01             | 0.904        | 16                   | 0.08             | 0.782            | 1                    | 0.04             | 0.836            |
| Soil history x N       | 1             | 0.01             | 0.936        | 17                   | 1.69             | 0.193            | 1                    | 0.36             | 0.549            |
| Soil treatment x N     | 2             | 2.16             | 0.339        | 19                   | 2.01             | 0.367            | 2                    | 0.24             | 0.886            |
| Plant history x D x N  | 1             | <0.01            | 0.999        | 20                   | 1.96             | 0.162            | 1                    | 0.42             | 0.518            |
| Soil history x D x N   | 1             | 0.10             | 0.752        | 21                   | 0.15             | 0.696            | 1                    | 1.48             | 0.224            |
| Soil treatment x D x N | 2             | 0.35             | 0.840        | 23                   | 0.50             | 0.781            | 2                    | 1.99             | 0.369            |
|                        | Root diameter |                  |              | SRL                  |                  |                  | RLD                  |                  |                  |
|                        | Df            | Chi <sup>2</sup> | P            | Df                   | Chi <sup>2</sup> | P                | Df                   | Chi <sup>2</sup> | P                |
| Plant history          | 1             | 0.08             | 0.783        | 1                    | 0.31             | 0.576            | 1                    | 0.09             | 0.767            |
| Soil history           | 1             | 0.23             | 0.629        | 1                    | 0.22             | 0.639            | 1                    | 0.82             | 0.364            |
| Soil treatment         | 2             | 2.89             | 0.236        | 2                    | 5.30             | 0.071            | 2                    | 3.35             | 0.187            |
| Drought (D)            | 1             | 0.32             | 0.572        | 1                    | 5.25             | <b>0.022</b>     | 1                    | 0.04             | 0.851            |
| Nitrogen input (N)     | 1             | 3.46             | 0.063        | 1                    | 13.72            | <b>&lt;0.001</b> | 1                    | 0.13             | 0.723            |
| D x N                  | 1             | 0.01             | 0.932        | 1                    | 1.62             | 0.204            | 1                    | <0.01            | 0.989            |
| Plant history x D      | 1             | 0.39             | 0.531        | 1                    | 0.11             | 0.740            | 1                    | 0.77             | 0.380            |
| Soil history x D       | 1             | 0.01             | 0.938        | 1                    | 0.95             | 0.329            | 1                    | 0.29             | 0.590            |
| Soil treatment x D     | 2             | 2.11             | 0.349        | 2                    | 0.51             | 0.775            | 2                    | 0.45             | 0.797            |
| Plant history x N      | 1             | 0.09             | 0.764        | 1                    | 1.41             | 0.235            | 1                    | 1.29             | 0.256            |
| Soil history x N       | 1             | 1.35             | 0.246        | 1                    | 0.32             | 0.573            | 1                    | 3.53             | 0.060            |
| Soil treatment x N     | 2             | 0.68             | 0.711        | 2                    | 1.06             | 0.590            | 2                    | 1.76             | 0.416            |
| Plant history x D x N  | 1             | 1.68             | 0.194        | 1                    | 2.73             | 0.099            | 1                    | 3.70             | 0.054            |
| Soil history x D x N   | 1             | 4.45             | <b>0.035</b> | 1                    | 0.52             | 0.469            | 1                    | 1.46             | 0.227            |
| Soil treatment x D x N | 2             | 2.00             | 0.369        | 2                    | 2.75             | 0.253            | 2                    | 2.26             | 0.324            |

1055

1056 **Table S7** Summary of mixed-effect model analyses testing the effects of legacy treatments (plant  
 1057 history, soil history, soil treatment), global change treatments (drought, nitrogen input) and their  
 1058 interactions on plant trait expressions of *A. pratensis*. Shown are degrees of freedom (Df), Chi<sup>2</sup> and  
 1059 P-values (P). Significant effects (P < 0.05) are given in bold, marginally significant effects (P < 0.1)  
 1060 in italics.  
 1061

| <i>A. pratensis</i>    | Growth height |                  |                  | Shoot nitrogen conc. |                  |                  | Leaf greenness       |                  |                  |
|------------------------|---------------|------------------|------------------|----------------------|------------------|------------------|----------------------|------------------|------------------|
|                        | Df            | Chi <sup>2</sup> | P                | Df                   | Chi <sup>2</sup> | P                | Df                   | Chi <sup>2</sup> | P                |
| Plant history          | 1             | 1.35             | 0.246            | 1                    | 0.16             | 0.687            | 1                    | 0.49             | 0.485            |
| Soil history           | 1             | 0.71             | 0.400            | 1                    | <0.01            | 0.967            | 1                    | 0.11             | 0.745            |
| Soil treatment         | 2             | 8.50             | <b>0.014</b>     | 2                    | 1.38             | 0.501            | 2                    | 0.20             | 0.903            |
| Drought (D)            | 1             | 1.07             | 0.300            | 1                    | 15.42            | <b>&lt;0.001</b> | 1                    | 16.09            | <b>&lt;0.001</b> |
| Nitrogen input (N)     | 1             | 10.63            | <b>0.001</b>     | 1                    | 246.65           | <b>&lt;0.001</b> | 1                    | 143.35           | <b>&lt;0.001</b> |
| D x N                  | 1             | 1.40             | 0.236            | 1                    | 17.58            | <b>&lt;0.001</b> | 1                    | 0.86             | 0.353            |
| Plant history x D      | 1             | 0.16             | 0.692            | 1                    | <0.01            | 0.979            | 1                    | 0.58             | 0.446            |
| Soil history x D       | 1             | 0.31             | 0.577            | 1                    | 0.52             | 0.471            | 1                    | 3.04             | <i>0.081</i>     |
| Soil treatment x D     | 2             | 1.11             | 0.575            | 2                    | 0.50             | 0.778            | 2                    | 3.39             | 0.183            |
| Plant history x N      | 1             | 0.28             | 0.597            | 1                    | 0.17             | 0.681            | 1                    | <0.01            | 0.994            |
| Soil history x N       | 1             | 0.01             | 0.919            | 1                    | 0.10             | 0.747            | 1                    | 1.10             | 0.293            |
| Soil treatment x N     | 2             | 2.42             | 0.299            | 2                    | 6.58             | <b>0.037</b>     | 2                    | 0.19             | 0.911            |
| Plant history x D x N  | 1             | 0.18             | 0.672            | 1                    | 0.87             | 0.352            | 1                    | 1.06             | 0.304            |
| Soil history x D x N   | 1             | 0.45             | 0.501            | 1                    | 0.49             | 0.485            | 1                    | 0.03             | 0.863            |
| Soil treatment x D x N | 2             | 0.85             | 0.654            | 2                    | 2.08             | 0.353            | 2                    | 0.32             | 0.854            |
|                        | LDMC          |                  |                  | SLA                  |                  |                  | Stomatal conductance |                  |                  |
|                        | Df            | Chi <sup>2</sup> | P                | Df                   | Chi <sup>2</sup> | P                | Df                   | Chi <sup>2</sup> | P                |
| Air temperature        | -             | -                | -                | -                    | -                | -                | 1                    | 0.16             | 0.685            |
| Daytime                | -             | -                | -                | -                    | -                | -                | 1                    | 1.78             | 0.182            |
| Plant history          | 1             | 2.82             | <i>0.093</i>     | 1                    | 0.19             | 0.665            | 1                    | 0.43             | 0.513            |
| Soil history           | 1             | 1.80             | 0.180            | 1                    | 0.94             | 0.332            | 1                    | 0.41             | 0.520            |
| Soil treatment         | 2             | 3.57             | 0.168            | 2                    | 5.69             | <i>0.058</i>     | 2                    | 3.67             | 0.159            |
| Drought (D)            | 1             | 4.02             | <b>0.045</b>     | 1                    | 1.29             | 0.255            | 1                    | 6.17             | <b>0.013</b>     |
| Nitrogen input (N)     | 1             | 0.75             | 0.388            | 1                    | 2.93             | <i>0.087</i>     | 1                    | 3.64             | <i>0.056</i>     |
| D x N                  | 1             | 0.33             | 0.566            | 1                    | 0.41             | 0.524            | 1                    | 3.45             | <i>0.063</i>     |
| Plant history x D      | 1             | 0.13             | 0.715            | 1                    | 0.27             | 0.604            | 1                    | 0.03             | 0.862            |
| Soil history x D       | 1             | 0.16             | 0.685            | 1                    | <0.01            | 0.980            | 1                    | 0.64             | 0.423            |
| Soil treatment x D     | 2             | 1.40             | 0.497            | 2                    | 1.39             | 0.499            | 2                    | 0.01             | 0.993            |
| Plant history x N      | 1             | 1.03             | 0.311            | 1                    | 1.02             | 0.313            | 1                    | 0.58             | 0.447            |
| Soil history x N       | 1             | <0.01            | 0.950            | 1                    | 0.78             | 0.377            | 1                    | 0.18             | 0.669            |
| Soil treatment x N     | 2             | 0.64             | 0.726            | 2                    | 2.56             | 0.278            | 2                    | 0.27             | 0.874            |
| Plant history x D x N  | 1             | 0.80             | 0.372            | 1                    | 1.67             | 0.197            | 1                    | 2.57             | 0.109            |
| Soil history x D x N   | 1             | 4.17             | <b>0.041</b>     | 1                    | 1.01             | 0.315            | 1                    | 0.23             | 0.634            |
| Soil treatment x D x N | 2             | 0.18             | 0.912            | 2                    | 1.09             | 0.581            | 2                    | 15.71            | <b>&lt;0.001</b> |
|                        | Root diameter |                  |                  | SRL                  |                  |                  | RLD                  |                  |                  |
|                        | Df            | Chi <sup>2</sup> | P                | Df                   | Chi <sup>2</sup> | P                | Df                   | Chi <sup>2</sup> | P                |
| Plant history          | 1             | 0.01             | 0.935            | 1                    | 0.28             | 0.597            | 1                    | 0.06             | 0.809            |
| Soil history           | 1             | 0.18             | 0.676            | 1                    | 0.01             | 0.934            | 1                    | 0.92             | 0.337            |
| Soil treatment         | 2             | 0.54             | 0.763            | 2                    | 0.97             | 0.615            | 2                    | 0.12             | 0.940            |
| Drought (D)            | 1             | 39.31            | <b>&lt;0.001</b> | 1                    | 5.25             | <b>0.022</b>     | 1                    | 82.01            | <b>&lt;0.001</b> |
| Nitrogen input (N)     | 1             | 51.80            | <b>&lt;0.001</b> | 1                    | 5.33             | <b>0.021</b>     | 1                    | 0.34             | 0.560            |
| D x N                  | 1             | 0.09             | 0.767            | 1                    | 5.57             | <b>0.018</b>     | 1                    | 4.32             | <b>0.038</b>     |
| Plant history x D      | 1             | 0.01             | 0.906            | 1                    | 0.30             | 0.587            | 1                    | 0.26             | 0.611            |
| Soil history x D       | 1             | 0.09             | 0.769            | 1                    | 0.01             | 0.910            | 1                    | 0.02             | 0.877            |
| Soil treatment x D     | 2             | 2.58             | 0.276            | 2                    | 4.88             | 0.087            | 2                    | 0.11             | 0.948            |
| Plant history x N      | 1             | 0.03             | 0.869            | 1                    | 0.19             | 0.660            | 1                    | 0.17             | 0.682            |
| Soil history x N       | 1             | 6.39             | <b>0.011</b>     | 1                    | 8.14             | <b>0.004</b>     | 1                    | 0.63             | 0.426            |
| Soil treatment x N     | 2             | 1.82             | 0.402            | 2                    | 3.27             | 0.195            | 2                    | 1.24             | 0.539            |
| Plant history x D x N  | 1             | 0.54             | 0.461            | 1                    | 0.15             | 0.700            | 1                    | 0.28             | 0.594            |
| Soil history x D x N   | 1             | 1.82             | 0.178            | 1                    | 1.87             | 0.172            | 1                    | 0.27             | 0.605            |
| Soil treatment x D x N | 2             | 3.23             | 0.199            | 2                    | 1.63             | 0.443            | 2                    | 0.70             | 0.703            |

1062  
1063

1064 **Table S8** Summary of mixed-effect model analyses testing the effects of legacy treatments (plant  
 1065 history, soil history, soil treatment), global change treatments (drought, nitrogen input) and their  
 1066 interactions on plant trait expressions of *D. glomerata*. Shown are degrees of freedom (Df), Chi<sup>2</sup> and  
 1067 P-values (P). Significant effects (P < 0.05) are given in bold, marginally significant effects (P < 0.1)  
 1068 in italics.  
 1069

| <i>D. glomerata</i>    | Growth height |                  |                  | Shoot nitrogen conc. |                  |                  | Leaf greenness       |                  |                  |
|------------------------|---------------|------------------|------------------|----------------------|------------------|------------------|----------------------|------------------|------------------|
|                        | Df            | Chi <sup>2</sup> | P                | Df                   | Chi <sup>2</sup> | P                | Df                   | Chi <sup>2</sup> | P                |
| Plant history          | 1             | 0.05             | 0.831            | 1                    | 0.58             | 0.444            | 1                    | 0.22             | 0.640            |
| Soil history           | 1             | 1.56             | 0.212            | 1                    | 1.35             | 0.245            | 1                    | 0.27             | 0.606            |
| Soil treatment         | 2             | 5.25             | 0.073            | 2                    | 0.75             | 0.687            | 2                    | 0.55             | 0.760            |
| Drought (D)            | 1             | <0.01            | 0.976            | 1                    | 19.10            | <b>&lt;0.001</b> | 1                    | 29.41            | <b>&lt;0.001</b> |
| Nitrogen input (N)     | 1             | 11.51            | <b>0.001</b>     | 1                    | 183.85           | <b>&lt;0.001</b> | 1                    | 172.91           | <b>&lt;0.001</b> |
| D x N                  | 1             | <0.01            | 0.949            | 1                    | 3.72             | 0.054            | 1                    | 0.08             | 0.781            |
| Plant history x D      | 1             | 0.01             | 0.920            | 1                    | 0.05             | 0.828            | 1                    | 2.75             | 0.097            |
| Soil history x D       | 1             | 0.82             | 0.366            | 1                    | 0.08             | 0.774            | 1                    | 0.22             | 0.639            |
| Soil treatment x D     | 2             | 0.48             | 0.785            | 2                    | 0.25             | 0.880            | 2                    | 0.21             | 0.899            |
| Plant history x N      | 1             | 0.91             | 0.341            | 1                    | 2.96             | 0.086            | 1                    | 0.61             | 0.437            |
| Soil history x N       | 1             | 0.23             | 0.633            | 1                    | 0.32             | 0.571            | 1                    | 1.75             | 0.186            |
| Soil treatment x N     | 2             | 0.35             | 0.840            | 2                    | 0.29             | 0.866            | 2                    | 4.92             | 0.085            |
| Plant history x D x N  | 1             | 0.12             | 0.733            | 1                    | 1.62             | 0.204            | 1                    | 0.54             | 0.462            |
| Soil history x D x N   | 1             | 0.71             | 0.400            | 1                    | 5.07             | <b>0.024</b>     | 1                    | <0.01            | 0.998            |
| Soil treatment x D x N | 2             | 0.06             | 0.969            | 2                    | 2.15             | 0.341            | 2                    | 0.33             | 0.846            |
|                        | LDMC          |                  |                  | SLA                  |                  |                  | Stomatal conductance |                  |                  |
|                        | Df            | Chi <sup>2</sup> | P                | Df                   | Chi <sup>2</sup> | P                | Df                   | Chi <sup>2</sup> | P                |
| Air temperature        | -             | -                | -                | -                    | -                | -                | 1                    | 0.39             | 0.531            |
| Daytime                | -             | -                | -                | -                    | -                | -                | 1                    | 20.31            | <b>&lt;0.001</b> |
| Plant history          | 1             | 0.12             | 0.727            | 1                    | 0.80             | 0.371            | 1                    | 5.08             | <b>0.024</b>     |
| Soil history           | 1             | 0.58             | 0.445            | 1                    | 0.32             | 0.573            | 1                    | <0.01            | 0.944            |
| Soil treatment         | 2             | 0.58             | 0.749            | 2                    | 1.20             | 0.548            | 2                    | 0.54             | 0.765            |
| Drought (D)            | 1             | 0.07             | 0.798            | 1                    | 0.54             | 0.461            | 1                    | 9.01             | <b>0.003</b>     |
| Nitrogen input (N)     | 1             | 55.57            | <b>&lt;0.001</b> | 1                    | 57.43            | <b>&lt;0.001</b> | 1                    | 2.72             | 0.099            |
| D x N                  | 1             | 20.69            | <b>&lt;0.001</b> | 1                    | 6.61             | <b>0.010</b>     | 1                    | 6.34             | <b>0.012</b>     |
| Plant history x D      | 1             | 0.04             | 0.842            | 1                    | 0.46             | 0.498            | 1                    | 0.07             | 0.793            |
| Soil history x D       | 1             | 0.01             | 0.926            | 1                    | 0.09             | 0.762            | 1                    | <0.01            | 0.991            |
| Soil treatment x D     | 2             | 1.43             | 0.490            | 2                    | 0.09             | 0.958            | 2                    | 0.19             | 0.907            |
| Plant history x N      | 1             | 0.99             | 0.320            | 1                    | 0.02             | 0.893            | 1                    | 0.32             | 0.571            |
| Soil history x N       | 1             | 2.48             | 0.115            | 1                    | 2.19             | 0.139            | 1                    | 0.69             | 0.406            |
| Soil treatment x N     | 2             | 0.13             | 0.938            | 2                    | 1.56             | 0.459            | 2                    | 0.09             | 0.958            |
| Plant history x D x N  | 1             | 2.00             | 0.157            | 1                    | 0.09             | 0.768            | 1                    | 0.33             | 0.566            |
| Soil history x D x N   | 1             | 1.30             | 0.254            | 1                    | 4.99             | <b>0.026</b>     | 1                    | 5.98             | <b>0.014</b>     |
| Soil treatment x D x N | 2             | 3.56             | 0.169            | 2                    | 1.09             | 0.579            | 2                    | 1.57             | 0.456            |
|                        | Root diameter |                  |                  | SRL                  |                  |                  | RLD                  |                  |                  |
|                        | Df            | Chi <sup>2</sup> | P                | Df                   | Chi <sup>2</sup> | P                | Df                   | Chi <sup>2</sup> | P                |
| Plant history          | 1             | 0.60             | 0.438            | 1                    | 0.96             | 0.326            | 1                    | 2.61             | 0.107            |
| Soil history           | 1             | 0.06             | 0.805            | 1                    | 0.07             | 0.791            | 1                    | 0.01             | 0.933            |
| Soil treatment         | 2             | 0.07             | 0.967            | 2                    | 0.58             | 0.749            | 2                    | 2.44             | 0.296            |
| Drought (D)            | 1             | 0.93             | 0.335            | 1                    | 1.16             | 0.281            | 1                    | 9.45             | <b>0.002</b>     |
| Nitrogen input (N)     | 1             | 1.22             | 0.270            | 1                    | 0.37             | 0.545            | 1                    | 7.05             | <b>0.008</b>     |
| D x N                  | 1             | 0.80             | 0.370            | 1                    | 1.73             | 0.189            | 1                    | 0.08             | 0.773            |
| Plant history x D      | 1             | 3.60             | 0.058            | 1                    | 0.64             | 0.425            | 1                    | 0.25             | 0.614            |
| Soil history x D       | 1             | 1.41             | 0.235            | 1                    | 0.62             | 0.430            | 1                    | 0.23             | 0.632            |
| Soil treatment x D     | 2             | 0.65             | 0.721            | 2                    | 1.95             | 0.377            | 2                    | 2.43             | 0.297            |
| Plant history x N      | 1             | 0.19             | 0.667            | 1                    | 2.05             | 0.152            | 1                    | 0.03             | 0.854            |
| Soil history x N       | 1             | 0.60             | 0.437            | 1                    | <0.01            | 0.994            | 1                    | 0.21             | 0.646            |
| Soil treatment x N     | 2             | 0.85             | 0.653            | 2                    | 0.97             | 0.616            | 2                    | 1.76             | 0.414            |
| Plant history x D x N  | 1             | 1.49             | 0.222            | 1                    | 0.14             | 0.712            | 1                    | 3.11             | 0.078            |
| Soil history x D x N   | 1             | 0.49             | 0.483            | 1                    | 3.54             | 0.060            | 1                    | 1.07             | 0.301            |
| Soil treatment x D x N | 2             | 1.65             | 0.438            | 2                    | 1.16             | 0.559            | 2                    | 0.20             | 0.907            |

1070

1071 **Table S9** Summary of mixed-effect model analyses testing the effects of legacy treatments (plant  
 1072 history, soil history, soil treatment), global change treatments (drought, nitrogen input) and their  
 1073 interactions on plant trait expressions of *P. trivialis*. Shown are degrees of freedom (Df), Chi<sup>2</sup> and P-  
 1074 values (P). Significant effects (P < 0.05) are given in bold, marginally significant effects (P < 0.1) in  
 1075 italics.  
 1076

| <i>P. trivialis</i>    | Growth height |                  |                  | Shoot nitrogen conc. |                  |                  | Leaf greenness       |                  |                  |
|------------------------|---------------|------------------|------------------|----------------------|------------------|------------------|----------------------|------------------|------------------|
|                        | Df            | Chi <sup>2</sup> | P                | Df                   | Chi <sup>2</sup> | P                | Df                   | Chi <sup>2</sup> | P                |
| Plant history          | 1             | 0.06             | 0.800            | 1                    | 0.00             | 0.997            | 1                    | 0.93             | 0.334            |
| Soil history           | 1             | 2.29             | 0.131            | 1                    | 0.05             | 0.824            | 1                    | 1.10             | 0.294            |
| Soil treatment         | 2             | 1.66             | 0.435            | 2                    | 0.51             | 0.776            | 2                    | 1.15             | 0.563            |
| Drought (D)            | 1             | 30.17            | <b>&lt;0.001</b> | 1                    | 5.46             | <b>0.019</b>     | 1                    | 1.42             | 0.233            |
| Nitrogen input (N)     | 1             | 12.16            | <b>&lt;0.001</b> | 1                    | 297.03           | <b>&lt;0.001</b> | 1                    | 108.82           | <b>&lt;0.001</b> |
| D x N                  | 1             | 1.72             | 0.190            | 1                    | 17.06            | <b>&lt;0.001</b> | 1                    | 1.09             | 0.296            |
| Plant history x D      | 1             | 0.22             | 0.637            | 1                    | 0.11             | 0.736            | 1                    | 3.08             | 0.079            |
| Soil history x D       | 1             | 2.28             | 0.131            | 1                    | 0.53             | 0.469            | 1                    | 0.06             | 0.806            |
| Soil treatment x D     | 2             | 3.11             | 0.211            | 2                    | 1.03             | 0.598            | 2                    | 0.18             | 0.916            |
| Plant history x N      | 1             | 5.16             | <b>0.023</b>     | 1                    | 0.05             | 0.821            | 1                    | 0.13             | 0.719            |
| Soil history x N       | 1             | 3.49             | <b>0.062</b>     | 1                    | 0.04             | 0.842            | 1                    | 0.36             | 0.549            |
| Soil treatment x N     | 2             | 2.08             | 0.354            | 2                    | 1.04             | 0.594            | 2                    | 1.98             | 0.371            |
| Plant history x D x N  | 1             | 0.92             | 0.336            | 1                    | 0.03             | 0.865            | 1                    | 0.11             | 0.738            |
| Soil history x D x N   | 1             | 0.13             | 0.718            | 1                    | 0.18             | 0.669            | 1                    | 0.00             | 0.967            |
| Soil treatment x D x N | 2             | 2.11             | 0.348            | 2                    | 5.57             | 0.062            | 2                    | 1.74             | 0.418            |
|                        | LDMC          |                  |                  | SLA                  |                  |                  | Stomatal conductance |                  |                  |
|                        | Df            | Chi <sup>2</sup> | P                | Df                   | Chi <sup>2</sup> | P                | Df                   | Chi <sup>2</sup> | P                |
| Air temperature        | -             | -                | -                | -                    | -                | -                | 1                    | 38.70            | <b>&lt;0.001</b> |
| Daytime                | -             | -                | -                | -                    | -                | -                | 1                    | 18.64            | <b>&lt;0.001</b> |
| Plant history          | 1             | <0.01            | 0.965            | 1                    | 0.62             | 0.431            | 1                    | 0.18             | 0.675            |
| Soil history           | 1             | 0.08             | 0.777            | 1                    | 0.49             | 0.485            | 1                    | 0.71             | 0.399            |
| Soil treatment         | 2             | 1.64             | 0.441            | 2                    | 2.12             | 0.346            | 2                    | 3.25             | 0.197            |
| Drought (D)            | 1             | 2.85             | 0.091            | 1                    | 2.75             | 0.097            | 1                    | 0.22             | 0.636            |
| Nitrogen input (N)     | 1             | 57.72            | <b>&lt;0.001</b> | 1                    | 41.44            | <b>&lt;0.001</b> | 1                    | 0.06             | 0.800            |
| D x N                  | 1             | 0.39             | 0.534            | 1                    | 0.62             | 0.431            | 1                    | 2.87             | 0.090            |
| Plant history x D      | 1             | 1.09             | 0.296            | 1                    | 0.38             | 0.540            | 1                    | 2.86             | 0.091            |
| Soil history x D       | 1             | 2.26             | 0.133            | 1                    | 0.45             | 0.502            | 1                    | 0.01             | 0.908            |
| Soil treatment x D     | 2             | 0.19             | 0.908            | 2                    | 1.33             | 0.515            | 2                    | 0.40             | 0.819            |
| Plant history x N      | 1             | 3.37             | 0.066            | 1                    | 1.56             | 0.212            | 1                    | 0.35             | 0.554            |
| Soil history x N       | 1             | 0.54             | 0.461            | 1                    | 0.21             | 0.645            | 1                    | 2.45             | 0.118            |
| Soil treatment x N     | 2             | 1.89             | 0.388            | 2                    | 3.10             | 0.213            | 2                    | 1.36             | 0.508            |
| Plant history x D x N  | 1             | 0.13             | 0.720            | 1                    | 0.58             | 0.446            | 1                    | 0.14             | 0.704            |
| Soil history x D x N   | 1             | 1.15             | 0.283            | 1                    | 1.01             | 0.315            | 1                    | 7.44             | <b>0.006</b>     |
| Soil treatment x D x N | 2             | 3.30             | 0.192            | 2                    | 0.99             | 0.610            | 2                    | 2.20             | 0.333            |
|                        | Root diameter |                  |                  | SRL                  |                  |                  | RLD                  |                  |                  |
|                        | Df            | Chi <sup>2</sup> | P                | Df                   | Chi <sup>2</sup> | P                | Df                   | Chi <sup>2</sup> | P                |
| Plant history          | 1             | 2.10             | 0.147            | 1                    | 2.38             | 0.123            | 1                    | 0.04             | 0.840            |
| Soil history           | 1             | 0.08             | 0.781            | 1                    | 0.30             | 0.581            | 1                    | 1.31             | 0.253            |
| Soil treatment         | 2             | 0.13             | 0.938            | 2                    | 0.31             | 0.856            | 2                    | 1.13             | 0.568            |
| Drought (D)            | 1             | 14.18            | <b>&lt;0.001</b> | 1                    | 0.89             | 0.347            | 1                    | 18.25            | <b>&lt;0.001</b> |
| Nitrogen input (N)     | 1             | 0.17             | 0.677            | 1                    | 3.49             | 0.062            | 1                    | 0.03             | 0.872            |
| D x N                  | 1             | 0.88             | 0.349            | 1                    | 0.25             | 0.618            | 1                    | 1.16             | 0.282            |
| Plant history x D      | 1             | 0.40             | 0.525            | 1                    | 0.27             | 0.602            | 1                    | 0.16             | 0.692            |
| Soil history x D       | 1             | 0.48             | 0.487            | 1                    | 0.20             | 0.655            | 1                    | 1.36             | 0.244            |
| Soil treatment x D     | 2             | 5.85             | 0.054            | 2                    | 0.50             | 0.777            | 2                    | 0.43             | 0.808            |
| Plant history x N      | 1             | 1.28             | 0.258            | 1                    | 0.07             | 0.795            | 1                    | 0.28             | 0.594            |
| Soil history x N       | 1             | 1.21             | 0.271            | 1                    | 0.36             | 0.549            | 1                    | 0.65             | 0.418            |
| Soil treatment x N     | 2             | 2.99             | 0.225            | 2                    | 9.11             | <b>0.011</b>     | 2                    | 0.33             | 0.846            |
| Plant history x D x N  | 1             | 0.33             | 0.566            | 1                    | 0.05             | 0.821            | 1                    | 0.02             | 0.878            |
| Soil history x D x N   | 1             | 4.11             | <b>0.043</b>     | 1                    | 9.74             | <b>0.002</b>     | 1                    | 2.06             | 0.151            |
| Soil treatment x D x N | 2             | 0.52             | 0.772            | 2                    | 1.40             | 0.495            | 2                    | 1.43             | 0.488            |

1077

1078

1079 **Table S10** Summary of mixed-effect model analyses testing the effects of legacy treatments (plant  
 1080 history, soil history, soil treatment), global change treatments (drought, nitrogen input) and their  
 1081 interactions on mildew infestation of *D. glomerata* and *P. trivialis*. Shown are degrees of freedom  
 1082 (Df), Chi<sup>2</sup> and P-values (P). Significant effects (P < 0.05) are given in bold, marginally significant  
 1083 effects (P < 0.1) in italics.  
 1084

| Mildew infestation     | <i>D. glomerata</i> |                  |                  | <i>P. trivialis</i> |                  |                  |
|------------------------|---------------------|------------------|------------------|---------------------|------------------|------------------|
|                        | Df                  | Chi <sup>2</sup> | P                | Df                  | Chi <sup>2</sup> | P                |
| Plant history          | 1                   | 0.29             | 0.588            | 1                   | 0.01             | 0.939            |
| Soil history           | 1                   | 0.24             | 0.622            | 1                   | 4.16             | <b>0.041</b>     |
| Soil treatment         | 2                   | 0.22             | 0.896            | 2                   | 3.36             | 0.187            |
| Drought (D)            | 1                   | 2.44             | 0.119            | 1                   | 10.69            | <b>0.001</b>     |
| Nitrogen input (N)     | 1                   | 42.75            | <b>&lt;0.001</b> | 1                   | 38.76            | <b>&lt;0.001</b> |
| D x N                  | 1                   | 1.05             | 0.305            | 1                   | 0.98             | 0.321            |
| Plant history x D      | 1                   | 0.03             | 0.855            | 1                   | 0.02             | 0.889            |
| Soil history x D       | 1                   | 2.25             | 0.134            | 1                   | 0.07             | 0.788            |
| Soil treatment x D     | 2                   | 5.79             | 0.055            | 2                   | 0.25             | 0.884            |
| Plant history x N      | 1                   | <0.01            | 0.953            | 1                   | 0.25             | 0.614            |
| Soil history x N       | 1                   | 0.21             | 0.643            | 1                   | 0.50             | 0.477            |
| Soil treatment x N     | 2                   | 0.32             | 0.854            | 2                   | 1.22             | 0.544            |
| Plant history x D x N  | 1                   | 3.00             | 0.083            | 1                   | 0.09             | 0.770            |
| Soil history x D x N   | 1                   | 1.69             | 0.193            | 1                   | 0.93             | 0.335            |
| Soil treatment x D x N | 2                   | 7.15             | <b>0.028</b>     | 2                   | 0.62             | 0.734            |

1085

1086

1087 **Appendix S3**

1088 Journal: eLife

1089 Article: Diversity-induced plant history and soil history effects modulate plant responses to global  
1090 change

1091 Authors: Peter Dietrich, Jens Schumacher, Nico Eisenhauer, Christiane Roscher

1092 \*corresponding author: peter.dietrich@idiv.de

1093

1094 *Hypothesis 3: offspring of plants selected at different diversity and grown in different soil (high vs.*  
1095 *low diversity, home vs. away) respond differently to global change drivers*

1096

1097 Plant traits and pathogen infestation (across species and for each species)

1098 Growth height did not differ depending on soil or plant history when plants were treated with global  
1099 change drivers across all study species and for *D. glomerata* (Table S1, S4). Plants of *A. elatius* in  
1100 home soil were smaller than plants in away-same soil (Table S2). Nitrogen input had no influence,  
1101 while plants were tallest in home soil and smallest in away-different soil when treated with both  
1102 global change drivers (Table S2). Plants of *A. pratensis* exposed to drought were taller when grown  
1103 in home than in away-different soil; however, this positive home effect was also only found in control  
1104 plants (marginal significant; Table S3). When fertilized, the positive home effect on growth height  
1105 disappeared (Table S3). Plants of *P. trivialis* were taller in two- than in six-species community soil  
1106 when treated with both global change drivers, but they were not different when treated separately  
1107 with drought or nitrogen input (Table S5).

1108 Leaf greenness and shoot nitrogen concentrations were not influenced by legacy treatments when  
1109 exposed to drought. When fertilized, plants still did not differ in leaf greenness but had higher shoot  
1110 nitrogen concentrations in six-species than in two-species soil, found across all study species and for  
1111 *D. glomerata* (Table S1, S4). Moreover, fertilized plants had a lower shoot nitrogen concentration in  
1112 home than in away-different soil, found across all species and for *A. pratensis* (Table S1, S3). When  
1113 plants were treated with both global change drivers, the nitrogen input effect on soil history was

1114 cancelled out by drought (across all species and for *D. glomerata*), while the impact of soil treatment  
1115 did not: plants in home soil still had lower shoot nitrogen concentration than plants in away soil  
1116 (across all species and for *A. pratensis*).

1117 Plants treated with global change drivers did not differ significantly in LDMC or SLA dependent on  
1118 legacy treatments, across all study species and in *A. elatius* (Table S1, S2). Drought resulted in higher  
1119 LDMC of *A. pratensis* plants grown in six-species soil, and the combined application of drought and  
1120 nitrogen input resulted in lower SLA in home than in away soil (Table S3). Fertilized *D. glomerata*  
1121 plants had higher SLA in six- than in two-species community soil (Table S4). Plants of *P. trivialis*  
1122 treated with both global change drivers had lower LDMC in two- than in six-species community soil  
1123 (Table S5).

1124 Stomatal conductance ( $g_s$ ) did not differ significantly depending on legacy treatments when plants  
1125 were treated with global change drivers across all study species and for *A. elatius* and *P. trivialis*  
1126 (Table S1, S2, S5). In *A. pratensis*, fertilized plants showed a lower  $g_s$  when grown in home than in  
1127 away soil. This effect was cancelled out by drought, when treated with both global change drivers  
1128 (Table S3). In *D. glomerata*, plants had higher  $g_s$  when originated from six-species communities and  
1129 treated with both global change drivers; however, this was also found in control plants (Table S4).

1130 Across all study species, root diameter, SRL and RLD were not influenced by legacy treatments  
1131 when treated with global change drivers (Table S1). In *A. elatius*, root traits also did not differ, when  
1132 treated with single global change drivers, but under the combined influence of both global change  
1133 drivers, plants grown in away-different soil showed the highest SRL, and plants in away-same soil  
1134 had the lowest SRL (Table S2). In *A. pratensis*, plants exposed to drought had higher SRL and RLD  
1135 in two- than in six-species soil. When fertilized, we did not find an effect of legacy treatment, but the  
1136 combination of both global change drivers led to higher SRL and lower root diameter when plants  
1137 were grown in away-same than in away-different or home soil (Table S3). In *D. glomerata*, RLD of  
1138 plants exposed to drought was higher when originated from six-species than from two-species  
1139 communities. This positive diversity impact disappeared when fertilized (Table S4). In *P. trivialis*,



1140 SRL were lower in plants grown in six-species community soil, when exposed to drought. When  
1141 fertilized, this difference disappeared (Table S5).

1142 Mildew infestation of *D. glomerata* plants exposed to drought was higher in home than in away soil,  
1143 while this drought effect was cancelled out by nitrogen input (Table S6). Mildew infestation of *P.*  
1144 *trivialis* plants was not significantly influenced by plant or soil history, neither with nor without  
1145 global change drivers (Table S6).

1146

## 1147 **Figures**

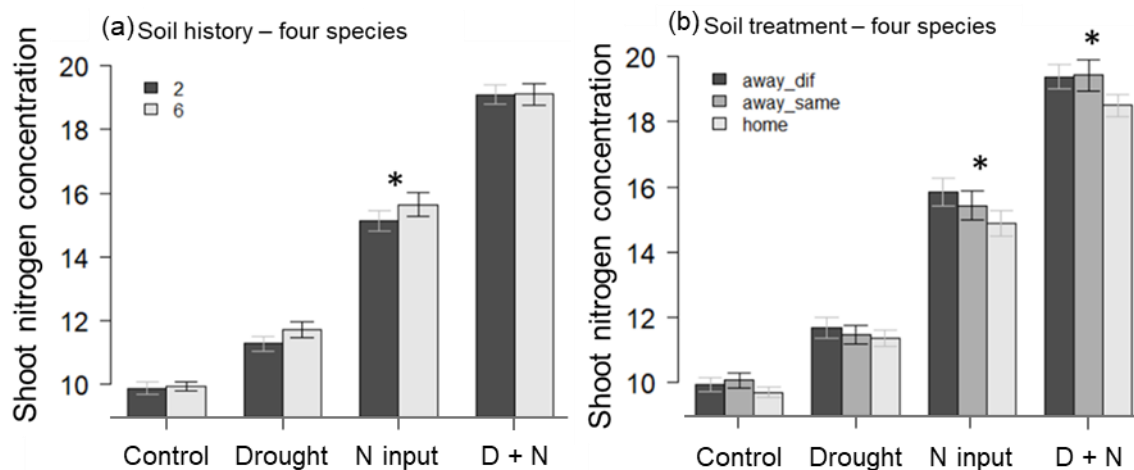

1148

1149 **Figure S1** Shoot nitrogen concentrations (mg N g<sub>shoot</sub><sup>-1</sup>) across all four species (a) grown in soil from  
1150 two- or six-species communities and (b) grown in away-different (away\_dif), away-same or home  
1151 soil, and either non-treated (“Control”), treated with drought (“Drought”), with nitrogen (“N input”)  
1152 or a combination of drought and nitrogen input (“D + N”). Bars show mean values (± 1 SE); stars  
1153 above bars indicate significant differences (P < 0.05).

1154

1155 **Tables**

1156

1157 **Table S1** Summary of mixed-effect model analyses testing the effects of species identity, legacy  
 1158 treatments (plant history, soil history, soil treatment) and their interactions on plant trait expressions,  
 1159 when non-treated (control) or treated with GC drivers (drought, nitrogen input, drought and nitrogen  
 1160 input (D x N)). Shown are degrees of freedom (Df), Chi<sup>2</sup> and P-values (P). Significant effects (P <  
 1161 0.05) are given in bold, marginally significant effects (P < 0.1) in italics.

1162

|                     | Growth height                |                  |                  |         |                  |                  |          |                  |                  |       |                  |                  |
|---------------------|------------------------------|------------------|------------------|---------|------------------|------------------|----------|------------------|------------------|-------|------------------|------------------|
|                     | Control                      |                  |                  | Drought |                  |                  | Nitrogen |                  |                  | D x N |                  |                  |
|                     | Df                           | Chi <sup>2</sup> | P                | Df      | Chi <sup>2</sup> | P                | Df       | Chi <sup>2</sup> | P                | Df    | Chi <sup>2</sup> | P                |
| Species ID          | 3                            | 36.51            | <b>&lt;0.001</b> | 3       | 46.47            | <b>&lt;0.001</b> | 3        | 26.45            | <b>&lt;0.001</b> | 3     | 53.85            | <b>&lt;0.001</b> |
| Plant history (PH)  | 1                            | 1.76             | 0.185            | 1       | 1.08             | 0.299            | 1        | 0.06             | 0.812            | 1     | 0.75             | 0.387            |
| Soil history (SH)   | 1                            | 0.48             | 0.488            | 1       | 0.86             | 0.354            | 1        | 1.52             | 0.217            | 1     | 1.40             | 0.237            |
| Soil treatment (ST) | 2                            | 3.99             | 0.136            | 2       | 5.49             | <i>0.064</i>     | 2        | 2.68             | 0.262            | 2     | 4.37             | 0.113            |
| Species ID x PH     | 3                            | 4.12             | 0.249            | 3       | 4.53             | 0.210            | 3        | 2.62             | 0.455            | 3     | 0.17             | 0.982            |
| Species ID x SH     | 3                            | 3.65             | 0.301            | 3       | 1.16             | 0.762            | 3        | 1.14             | 0.766            | 3     | 6.66             | <i>0.084</i>     |
| Species ID x ST     | 6                            | 8.19             | 0.224            | 6       | 13.52            | <b>0.035</b>     | 6        | 6.01             | 0.423            | 6     | 7.18             | 0.305            |
|                     | Shoot nitrogen concentration |                  |                  |         |                  |                  |          |                  |                  |       |                  |                  |
|                     | Control                      |                  |                  | Drought |                  |                  | Nitrogen |                  |                  | D x N |                  |                  |
|                     | Df                           | Chi <sup>2</sup> | P                | Df      | Chi <sup>2</sup> | P                | Df       | Chi <sup>2</sup> | P                | Df    | Chi <sup>2</sup> | P                |
| Species ID          | 3                            | 49.63            | <b>&lt;0.001</b> | 3       | 23.08            | <b>&lt;0.001</b> | 3        | 73.52            | <b>&lt;0.001</b> | 3     | 30.02            | <b>&lt;0.001</b> |
| Plant history (PH)  | 1                            | 0.94             | 0.333            | 1       | 0.08             | 0.775            | 1        | 0.50             | 0.480            | 1     | 0.03             | 0.871            |
| Soil history (SH)   | 1                            | <0.01            | 0.963            | 1       | 1.50             | 0.221            | 1        | 4.67             | <b>0.031</b>     | 1     | <0.01            | 0.953            |
| Soil treatment (ST) | 2                            | 2.94             | 0.230            | 2       | 1.32             | 0.517            | 2        | 7.52             | <b>0.023</b>     | 2     | 8.53             | <b>0.014</b>     |
| Species ID x PH     | 3                            | 2.80             | 0.424            | 3       | 5.03             | 0.170            | 3        | 4.00             | 0.262            | 3     | 2.20             | 0.533            |
| Species ID x SH     | 3                            | 1.14             | 0.767            | 3       | 2.99             | 0.392            | 3        | 7.02             | <i>0.071</i>     | 3     | 0.31             | 0.958            |
| Species ID x ST     | 6                            | 12.36            | <i>0.054</i>     | 6       | 6.88             | 0.332            | 6        | 6.13             | 0.409            | 6     | 4.73             | 0.579            |
|                     | Leaf greenness               |                  |                  |         |                  |                  |          |                  |                  |       |                  |                  |
|                     | Control                      |                  |                  | Drought |                  |                  | Nitrogen |                  |                  | D x N |                  |                  |
|                     | Df                           | Chi <sup>2</sup> | P                | Df      | Chi <sup>2</sup> | P                | Df       | Chi <sup>2</sup> | P                | Df    | Chi <sup>2</sup> | P                |
| Species ID          | 3                            | 45.88            | <b>&lt;0.001</b> | 3       | 44.96            | <b>&lt;0.001</b> | 3        | 54.85            | <b>&lt;0.001</b> | 3     | 71.04            | <b>&lt;0.001</b> |
| Plant history (PH)  | 1                            | 1.61             | 0.204            | 1       | 0.11             | 0.740            | 1        | 0.43             | 0.514            | 1     | 0.02             | 0.876            |
| Soil history (SH)   | 1                            | 0.18             | 0.675            | 1       | 1.84             | 0.175            | 1        | 1.04             | 0.308            | 1     | 0.11             | 0.738            |
| Soil treatment (ST) | 2                            | 2.10             | 0.350            | 2       | 1.62             | 0.444            | 2        | 0.41             | 0.813            | 2     | 1.62             | 0.445            |
| Species ID x PH     | 3                            | 4.39             | 0.222            | 3       | 3.98             | 0.264            | 3        | 1.88             | 0.600            | 3     | 2.78             | 0.427            |
| Species ID x SH     | 3                            | 4.45             | 0.216            | 3       | 3.44             | 0.329            | 3        | 0.89             | 0.829            | 3     | 0.35             | 0.950            |
| Species ID x ST     | 6                            | 3.54             | 0.739            | 6       | 3.92             | 0.688            | 6        | 8.79             | 0.186            | 6     | 3.38             | 0.759            |
|                     | LDMC                         |                  |                  |         |                  |                  |          |                  |                  |       |                  |                  |
|                     | Control                      |                  |                  | Drought |                  |                  | Nitrogen |                  |                  | D x N |                  |                  |
|                     | Df                           | Chi <sup>2</sup> | P                | Df      | Chi <sup>2</sup> | P                | Df       | Chi <sup>2</sup> | P                | Df    | Chi <sup>2</sup> | P                |
| Species ID          | 3                            | 32.76            | <b>&lt;0.001</b> | 3       | 22.47            | <b>&lt;0.001</b> | 3        | 78.30            | <b>&lt;0.001</b> | 3     | 43.04            | <b>&lt;0.001</b> |
| Plant history (PH)  | 1                            | 0.33             | 0.565            | 1       | 2.01             | 0.156            | 1        | 0.03             | 0.861            | 1     | 0.03             | 0.870            |
| Soil history (SH)   | 1                            | 0.02             | 0.887            | 1       | 0.56             | 0.456            | 1        | 0.06             | 0.808            | 1     | 0.17             | 0.680            |
| Soil treatment (ST) | 2                            | 2.83             | 0.243            | 2       | 1.27             | 0.529            | 2        | 1.34             | 0.511            | 2     | 0.80             | 0.670            |
| Species ID x PH     | 3                            | 1.71             | 0.635            | 3       | 0.26             | 0.967            | 3        | 1.00             | 0.802            | 3     | 4.79             | 0.188            |
| Species ID x SH     | 3                            | 1.69             | 0.638            | 3       | 4.04             | 0.257            | 3        | 5.48             | 0.140            | 3     | 2.91             | 0.405            |
| Species ID x ST     | 6                            | 3.52             | 0.742            | 6       | 1.10             | 0.981            | 6        | 5.73             | 0.454            | 6     | 11.22            | <i>0.082</i>     |
|                     | SLA                          |                  |                  |         |                  |                  |          |                  |                  |       |                  |                  |
|                     | Control                      |                  |                  | Drought |                  |                  | Nitrogen |                  |                  | D x N |                  |                  |
|                     | Df                           | Chi <sup>2</sup> | P                | Df      | Chi <sup>2</sup> | P                | Df       | Chi <sup>2</sup> | P                | Df    | Chi <sup>2</sup> | P                |
| Species ID          | 3                            | 86.36            | <b>&lt;0.001</b> | 3       | 57.20            | <b>&lt;0.001</b> | 3        | 101.71           | <b>&lt;0.001</b> | 3     | 73.53            | <b>&lt;0.001</b> |
| Plant history (PH)  | 1                            | 0.19             | 0.661            | 1       | 0.39             | 0.530            | 1        | 1.55             | 0.214            | 1     | 0.33             | 0.567            |
| Soil history (SH)   | 1                            | 0.64             | 0.425            | 1       | 0.01             | 0.926            | 1        | 3.35             | <i>0.067</i>     | 1     | 0.26             | 0.607            |
| Soil treatment (ST) | 2                            | 4.38             | 0.112            | 2       | 1.43             | 0.488            | 2        | 2.32             | 0.313            | 2     | 1.50             | 0.472            |
| Species ID x PH     | 3                            | 1.58             | 0.663            | 3       | 1.26             | 0.738            | 3        | 0.96             | 0.810            | 3     | 4.38             | 0.223            |
| Species ID x SH     | 3                            | 2.26             | 0.521            | 3       | 1.47             | 0.690            | 3        | 3.69             | 0.297            | 3     | 1.90             | 0.592            |
| Species ID x ST     | 6                            | 2.38             | 0.882            | 6       | 2.88             | 0.824            | 6        | 4.08             | 0.666            | 6     | 14.22            | <b>0.027</b>     |

1163

1164

1165 **Table S1** continued

1166

|                     | Stomatal conductance |                  |                  |         |                  |                  |          |                  |                  |       |                  |                  |
|---------------------|----------------------|------------------|------------------|---------|------------------|------------------|----------|------------------|------------------|-------|------------------|------------------|
|                     | Control              |                  |                  | Drought |                  |                  | Nitrogen |                  |                  | D x N |                  |                  |
|                     | Df                   | Chi <sup>2</sup> | P                | Df      | Chi <sup>2</sup> | P                | Df       | Chi <sup>2</sup> | P                | Df    | Chi <sup>2</sup> | P                |
| Temperature         | 1                    | 0.75             | 0.388            | 1       | 1.40             | 0.237            | 1        | 3.18             | 0.074            | 1     | 0.18             | 0.670            |
| Daytime             | 1                    | 18.95            | <b>&lt;0.001</b> | 1       | 13.20            | <b>&lt;0.001</b> | 1        | 5.72             | <b>&lt;0.001</b> | 1     | 16.06            | <b>&lt;0.001</b> |
| Species ID          | 3                    | 45.36            | <b>&lt;0.001</b> | 3       | 24.61            | <b>&lt;0.001</b> | 3        | 42.88            | <b>&lt;0.001</b> | 3     | 21.71            | <b>&lt;0.001</b> |
| Plant history (PH)  | 1                    | 0.60             | 0.438            | 1       | 0.01             | 0.910            | 1        | 0.48             | 0.490            | 1     | 2.95             | 0.086            |
| Soil history (SH)   | 1                    | 0.10             | 0.757            | 1       | 0.05             | 0.818            | 1        | 1.15             | 0.283            | 1     | 0.07             | 0.797            |
| Soil treatment (ST) | 2                    | 0.08             | 0.963            | 2       | 2.67             | 0.263            | 2        | 4.85             | 0.088            | 2     | 0.20             | 0.905            |
| Species ID x PH     | 3                    | 4.59             | 0.204            | 3       | 3.18             | 0.365            | 3        | 4.89             | 0.180            | 3     | 4.89             | 0.180            |
| Species ID x SH     | 3                    | 2.60             | 0.457            | 3       | 3.53             | 0.317            | 3        | 3.23             | 0.358            | 3     | 3.36             | 0.340            |
| Species ID x ST     | 6                    | 8.36             | 0.213            | 6       | 4.47             | 0.614            | 6        | 3.82             | 0.701            | 6     | 4.76             | 0.575            |
|                     | Root diameter        |                  |                  |         |                  |                  |          |                  |                  |       |                  |                  |
|                     | Control              |                  |                  | Drought |                  |                  | Nitrogen |                  |                  | D x N |                  |                  |
|                     | Df                   | Chi <sup>2</sup> | P                | Df      | Chi <sup>2</sup> | P                | Df       | Chi <sup>2</sup> | P                | Df    | Chi <sup>2</sup> | P                |
| Species ID          | 3                    | 97.02            | <b>&lt;0.001</b> | 3       | 103.81           | <b>&lt;0.001</b> | 3        | 93.37            | <b>&lt;0.001</b> | 3     | 106.66           | <b>&lt;0.001</b> |
| Plant history (PH)  | 1                    | 0.87             | 0.352            | 1       | 0.02             | 0.883            | 1        | <0.01            | 0.951            | 1     | 0.08             | 0.775            |
| Soil history (SH)   | 1                    | 0.17             | 0.680            | 1       | 0.22             | 0.643            | 1        | 1.41             | 0.235            | 1     | 0.03             | 0.873            |
| Soil treatment (ST) | 2                    | 2.42             | 0.298            | 2       | 0.93             | 0.629            | 2        | 1.28             | 0.528            | 2     | 0.46             | 0.793            |
| Species ID x PH     | 3                    | 0.79             | 0.852            | 3       | 0.19             | 0.979            | 3        | 4.53             | 0.291            | 3     | 3.28             | 0.350            |
| Species ID x SH     | 3                    | 6.10             | 0.107            | 3       | 3.40             | 0.334            | 3        | 5.40             | 0.145            | 3     | 0.31             | 0.959            |
| Species ID x ST     | 6                    | 9.36             | 0.155            | 6       | 2.06             | 0.914            | 6        | 1.41             | 0.965            | 6     | 13.49            | <b>0.036</b>     |
|                     | SRL                  |                  |                  |         |                  |                  |          |                  |                  |       |                  |                  |
|                     | Control              |                  |                  | Drought |                  |                  | Nitrogen |                  |                  | D x N |                  |                  |
|                     | Df                   | Chi <sup>2</sup> | P                | Df      | Chi <sup>2</sup> | P                | Df       | Chi <sup>2</sup> | P                | Df    | Chi <sup>2</sup> | P                |
| Species ID          | 3                    | 125.58           | <b>&lt;0.001</b> | 3       | 123.96           | <b>&lt;0.001</b> | 3        | 117.21           | <b>&lt;0.001</b> | 3     | 144.90           | <b>&lt;0.001</b> |
| Plant history (PH)  | 1                    | 0.31             | 0.579            | 1       | 0.04             | 0.833            | 1        | 2.81             | 0.094            | 1     | 0.05             | 0.830            |
| Soil history (SH)   | 1                    | <0.01            | 0.986            | 1       | 1.17             | 0.279            | 1        | 1.37             | 0.242            | 1     | 1.48             | 0.224            |
| Soil treatment (ST) | 2                    | 1.46             | 0.483            | 2       | 0.67             | 0.717            | 2        | 4.01             | 0.135            | 2     | 0.28             | 0.869            |
| Species ID x PH     | 3                    | 5.15             | 0.161            | 3       | 2.11             | 0.550            | 3        | 2.96             | 0.397            | 3     | 2.31             | 0.510            |
| Species ID x SH     | 3                    | 3.89             | 0.274            | 3       | 6.14             | 0.105            | 3        | 3.40             | 0.334            | 3     | 1.93             | 0.586            |
| Species ID x ST     | 6                    | 13.23            | <b>0.040</b>     | 6       | 2.92             | 0.819            | 6        | 2.90             | 0.821            | 6     | 14.70            | <b>0.023</b>     |
|                     | RLD                  |                  |                  |         |                  |                  |          |                  |                  |       |                  |                  |
|                     | Control              |                  |                  | Drought |                  |                  | Nitrogen |                  |                  | D x N |                  |                  |
|                     | Df                   | Chi <sup>2</sup> | P                | Df      | Chi <sup>2</sup> | P                | Df       | Chi <sup>2</sup> | P                | Df    | Chi <sup>2</sup> | P                |
| Species ID          | 3                    | 99.14            | <b>&lt;0.001</b> | 3       | 101.33           | <b>&lt;0.001</b> | 3        | 91.27            | <b>&lt;0.001</b> | 3     | 75.25            | <b>&lt;0.001</b> |
| Plant history (PH)  | 1                    | 0.00             | 0.956            | 1       | 3.36             | 0.067            | 1        | 0.11             | 0.742            | 1     | 0.98             | 0.323            |
| Soil history (SH)   | 1                    | 2.93             | 0.087            | 1       | 0.14             | 0.710            | 1        | 0.67             | 0.413            | 1     | 0.55             | 0.460            |
| Soil treatment (ST) | 2                    | 2.50             | 0.286            | 2       | 2.56             | 0.279            | 2        | 0.03             | 0.983            | 2     | 4.98             | 0.083            |
| Species ID x PH     | 3                    | 1.35             | 0.716            | 3       | 5.11             | 0.164            | 3        | 2.59             | 0.459            | 3     | 0.59             | 0.900            |
| Species ID x SH     | 3                    | 5.42             | 0.144            | 3       | 2.89             | 0.409            | 3        | 0.45             | 0.929            | 3     | 0.49             | 0.921            |
| Species ID x ST     | 6                    | 2.77             | 0.838            | 6       | 4.44             | 0.617            | 6        | 0.91             | 0.989            | 6     | 6.27             | 0.393            |

1167

1168

1169 **Table S2** Summary of mixed-effect model analyses testing the effects of legacy treatments (plant  
 1170 history, soil history, soil treatment) on plant trait expressions of *A. elatius*, when non-treated (control)  
 1171 or treated with GC drivers (drought, nitrogen input, drought and nitrogen input (D x N)). Shown are  
 1172 degrees of freedom (Df), Chi<sup>2</sup> and P-values (P). Significant effects (P < 0.05) are given in bold,  
 1173 marginally significant effects (P < 0.1) in italics.  
 1174

| <i>A. elatius</i>            |         |                  |              |         |                  |              |          |                  |              |       |                  |              |
|------------------------------|---------|------------------|--------------|---------|------------------|--------------|----------|------------------|--------------|-------|------------------|--------------|
| Growth height                |         |                  |              |         |                  |              |          |                  |              |       |                  |              |
|                              | Control |                  |              | Drought |                  |              | Nitrogen |                  |              | D x N |                  |              |
|                              | Df      | Chi <sup>2</sup> | P            | Df      | Chi <sup>2</sup> | P            | Df       | Chi <sup>2</sup> | P            | Df    | Chi <sup>2</sup> | P            |
| Plant history                | 1       | 0.32             | 0.569        | 1       | 2.94             | <i>0.087</i> | 1        | 1.01             | 0.314        | 1     | 0.13             | 0.719        |
| Soil history                 | 1       | 1.50             | 0.221        | 1       | 0.07             | 0.787        | 1        | 0.14             | 0.706        | 1     | 0.29             | 0.593        |
| Soil treatment               | 2       | 2.67             | 0.263        | 2       | 10.64            | <b>0.005</b> | 2        | 1.55             | 0.461        | 2     | 7.58             | <b>0.023</b> |
| Shoot nitrogen concentration |         |                  |              |         |                  |              |          |                  |              |       |                  |              |
|                              | Control |                  |              | Drought |                  |              | Nitrogen |                  |              | D x N |                  |              |
|                              | Df      | Chi <sup>2</sup> | P            | Df      | Chi <sup>2</sup> | P            | Df       | Chi <sup>2</sup> | P            | Df    | Chi <sup>2</sup> | P            |
| Plant history                | 1       | 0.52             | 0.472        | 1       | 3.46             | <i>0.063</i> | 1        | <0.01            | 0.974        | 1     | 0.06             | 0.802        |
| Soil history                 | 1       | 0.89             | 0.347        | 1       | 0.04             | 0.843        | 1        | 1.64             | 0.200        | 1     | 0.06             | 0.803        |
| Soil treatment               | 2       | 1.40             | 0.497        | 2       | 1.54             | 0.462        | 2        | 1.99             | 0.369        | 2     | 2.07             | 0.354        |
| Leaf greenness               |         |                  |              |         |                  |              |          |                  |              |       |                  |              |
|                              | Control |                  |              | Drought |                  |              | Nitrogen |                  |              | D x N |                  |              |
|                              | Df      | Chi <sup>2</sup> | P            | Df      | Chi <sup>2</sup> | P            | Df       | Chi <sup>2</sup> | P            | Df    | Chi <sup>2</sup> | P            |
| Plant history                | 1       | 1.19             | 0.275        | 1       | 0.60             | 0.438        | 1        | 1.13             | 0.288        | 1     | 0.22             | 0.636        |
| Soil history                 | 1       | 1.50             | 0.221        | 1       | 0.99             | 0.321        | 1        | 0.03             | 0.862        | 1     | 0.15             | 0.699        |
| Soil treatment               | 2       | 5.20             | <i>0.074</i> | 2       | 0.44             | 0.801        | 2        | 3.64             | 0.162        | 2     | 0.84             | 0.656        |
| LDMC                         |         |                  |              |         |                  |              |          |                  |              |       |                  |              |
|                              | Control |                  |              | Drought |                  |              | Nitrogen |                  |              | D x N |                  |              |
|                              | Df      | Chi <sup>2</sup> | P            | Df      | Chi <sup>2</sup> | P            | Df       | Chi <sup>2</sup> | P            | Df    | Chi <sup>2</sup> | P            |
| Plant history                | 1       | 0.01             | 0.942        | 1       | 1.15             | 0.284        | 1        | <0.01            | 0.987        | 1     | 1.02             | 0.313        |
| Soil history                 | 1       | 0.07             | 0.798        | 1       | 0.13             | 0.718        | 1        | 0.04             | 0.837        | 1     | 0.31             | 0.580        |
| Soil treatment               | 2       | 0.03             | 0.985        | 2       | 0.34             | 0.844        | 2        | 2.00             | 0.369        | 2     | 2.44             | 0.295        |
| SLA                          |         |                  |              |         |                  |              |          |                  |              |       |                  |              |
|                              | Control |                  |              | Drought |                  |              | Nitrogen |                  |              | D x N |                  |              |
|                              | Df      | Chi <sup>2</sup> | P            | Df      | Chi <sup>2</sup> | P            | Df       | Chi <sup>2</sup> | P            | Df    | Chi <sup>2</sup> | P            |
| Plant history                | 1       | 0.44             | 0.507        | 1       | 0.61             | 0.435        | 1        | 0.48             | 0.488        | 1     | 1.63             | 0.202        |
| Soil history                 | 1       | 0.04             | 0.836        | 1       | 0.22             | 0.638        | 1        | 0.88             | 0.348        | 1     | 1.08             | 0.300        |
| Soil treatment               | 2       | 0.59             | 0.744        | 2       | 0.13             | 0.936        | 2        | 2.74             | 0.254        | 2     | 3.10             | 0.212        |
| Stomatal conductance         |         |                  |              |         |                  |              |          |                  |              |       |                  |              |
|                              | Control |                  |              | Drought |                  |              | Nitrogen |                  |              | D x N |                  |              |
|                              | Df      | Chi <sup>2</sup> | P            | Df      | Chi <sup>2</sup> | P            | Df       | Chi <sup>2</sup> | P            | Df    | Chi <sup>2</sup> | P            |
| Temperature                  | 1       | 0.05             | 0.827        | 1       | 0.53             | 0.465        | 1        | 0.91             | 0.340        | 1     | 0.09             | 0.763        |
| Daytime                      | 1       | 6.15             | <b>0.013</b> | 1       | 3.92             | <b>0.048</b> | 1        | 0.68             | 0.408        | 1     | 0.37             | 0.544        |
| Plant history                | 1       | 0.49             | 0.484        | 1       | 0.05             | 0.824        | 1        | 1.23             | 0.267        | 1     | 0.18             | 0.670        |
| Soil history                 | 1       | 0.83             | 0.361        | 1       | 0.13             | 0.718        | 1        | 0.92             | 0.336        | 1     | <0.01            | 0.998        |
| Soil treatment               | 2       | 0.96             | 0.618        | 2       | 1.69             | 0.429        | 2        | 2.99             | 0.224        | 2     | 0.33             | 0.846        |
| Root diameter                |         |                  |              |         |                  |              |          |                  |              |       |                  |              |
|                              | Control |                  |              | Drought |                  |              | Nitrogen |                  |              | D x N |                  |              |
|                              | Df      | Chi <sup>2</sup> | P            | Df      | Chi <sup>2</sup> | P            | Df       | Chi <sup>2</sup> | P            | Df    | Chi <sup>2</sup> | P            |
| Plant history                | 1       | 0.24             | 0.627        | 1       | <0.01            | 0.972        | 1        | 0.46             | 0.497        | 1     | 0.45             | 0.503        |
| Soil history                 | 1       | 1.37             | 0.242        | 1       | 0.53             | 0.467        | 1        | 2.59             | 0.108        | 1     | 0.10             | 0.754        |
| Soil treatment               | 2       | 4.85             | <i>0.089</i> | 2       | 0.52             | 0.770        | 2        | 1.00             | 0.605        | 2     | 3.86             | 0.145        |
| SRL                          |         |                  |              |         |                  |              |          |                  |              |       |                  |              |
|                              | Control |                  |              | Drought |                  |              | Nitrogen |                  |              | D x N |                  |              |
|                              | Df      | Chi <sup>2</sup> | P            | Df      | Chi <sup>2</sup> | P            | Df       | Chi <sup>2</sup> | P            | Df    | Chi <sup>2</sup> | P            |
| Plant history                | 1       | 0.80             | 0.371        | 1       | 0.16             | 0.686        | 1        | 2.32             | 0.128        | 1     | 0.54             | 0.462        |
| Soil history                 | 1       | 0.06             | 0.807        | 1       | 0.02             | 0.884        | 1        | 2.66             | 0.103        | 1     | 0.21             | 0.649        |
| Soil treatment               | 2       | 2.94             | 0.230        | 2       | 1.81             | 0.404        | 2        | 4.63             | <i>0.099</i> | 2     | 9.49             | <b>0.009</b> |
| RLD                          |         |                  |              |         |                  |              |          |                  |              |       |                  |              |
|                              | Control |                  |              | Drought |                  |              | Nitrogen |                  |              | D x N |                  |              |
|                              | Df      | Chi <sup>2</sup> | P            | Df      | Chi <sup>2</sup> | P            | Df       | Chi <sup>2</sup> | P            | Df    | Chi <sup>2</sup> | P            |
| Plant history                | 1       | 1.02             | 0.313        | 1       | 0.03             | 0.859        | 1        | 2.42             | 0.120        | 1     | 1.44             | 0.230        |
| Soil history                 | 1       | 2.51             | 0.113        | 1       | 1.14             | 0.286        | 1        | 1.03             | 0.310        | 1     | 0.46             | 0.500        |
| Soil treatment               | 2       | 4.52             | 0.104        | 2       | 1.24             | 0.539        | 2        | 0.26             | 0.878        | 2     | 1.40             | 0.497        |

1175 **Table S3** Summary of mixed-effect model analyses testing the effects of legacy treatments (plant  
 1176 history, soil history, soil treatment) on plant trait expressions of *A. pratensis*, when non-treated  
 1177 (control) or treated with GC drivers (drought, nitrogen input, drought and nitrogen input (D x N)).  
 1178 Shown are degrees of freedom (Df), Chi<sup>2</sup> and P-values (P). Significant effects (P < 0.05) are given in  
 1179 bold, marginally significant effects (P < 0.1) in italics.  
 1180

| <i>A. pratensis</i>          |         |                  |              |         |                  |              |          |                  |              |       |                  |              |
|------------------------------|---------|------------------|--------------|---------|------------------|--------------|----------|------------------|--------------|-------|------------------|--------------|
| Growth height                |         |                  |              |         |                  |              |          |                  |              |       |                  |              |
|                              | Control |                  |              | Drought |                  |              | Nitrogen |                  |              | D x N |                  |              |
|                              | Df      | Chi <sup>2</sup> | P            | Df      | Chi <sup>2</sup> | P            | Df       | Chi <sup>2</sup> | P            | Df    | Chi <sup>2</sup> | P            |
| Plant history                | 1       | 1.50             | 0.221        | 1       | 0.56             | 0.454        | 1        | 0.03             | 0.868        | 1     | 0.94             | 0.332        |
| Soil history                 | 1       | 0.44             | 0.508        | 1       | 0.15             | 0.700        | 1        | 0.03             | 0.874        | 1     | 0.82             | 0.365        |
| Soil treatment               | 2       | 5.77             | <i>0.056</i> | 2       | 6.56             | <b>0.038</b> | 2        | 3.00             | 0.223        | 2     | 0.26             | 0.879        |
| Shoot nitrogen concentration |         |                  |              |         |                  |              |          |                  |              |       |                  |              |
|                              | Control |                  |              | Drought |                  |              | Nitrogen |                  |              | D x N |                  |              |
|                              | Df      | Chi <sup>2</sup> | P            | Df      | Chi <sup>2</sup> | P            | Df       | Chi <sup>2</sup> | P            | Df    | Chi <sup>2</sup> | P            |
| Plant history                | 1       | 1.75             | 0.186        | 1       | 0.17             | 0.680        | 1        | 0.10             | 0.755        | 1     | 0.84             | 0.358        |
| Soil history                 | 1       | 0.37             | 0.544        | 1       | 0.96             | 0.328        | 1        | 0.01             | 0.939        | 1     | 0.00             | 0.966        |
| Soil treatment               | 2       | 4.61             | <i>0.100</i> | 2       | 1.74             | 0.419        | 2        | 9.05             | <b>0.011</b> | 2     | 6.83             | <b>0.033</b> |
| Leaf greenness               |         |                  |              |         |                  |              |          |                  |              |       |                  |              |
|                              | Control |                  |              | Drought |                  |              | Nitrogen |                  |              | D x N |                  |              |
|                              | Df      | Chi <sup>2</sup> | P            | Df      | Chi <sup>2</sup> | P            | Df       | Chi <sup>2</sup> | P            | Df    | Chi <sup>2</sup> | P            |
| Plant history                | 1       | 0.07             | 0.786        | 1       | 1.03             | 0.311        | 1        | 0.58             | 0.445        | 1     | 0.18             | 0.673        |
| Soil history                 | 1       | 0.03             | 0.869        | 1       | 1.85             | 0.174        | 1        | 0.90             | 0.343        | 1     | 0.19             | 0.661        |
| Soil treatment               | 2       | 1.16             | 0.560        | 2       | 0.60             | 0.743        | 2        | 0.61             | 0.737        | 2     | 2.21             | 0.332        |
| LDMC                         |         |                  |              |         |                  |              |          |                  |              |       |                  |              |
|                              | Control |                  |              | Drought |                  |              | Nitrogen |                  |              | D x N |                  |              |
|                              | Df      | Chi <sup>2</sup> | P            | Df      | Chi <sup>2</sup> | P            | Df       | Chi <sup>2</sup> | P            | Df    | Chi <sup>2</sup> | P            |
| Plant history                | 1       | 0.34             | 0.561        | 1       | 0.38             | 0.538        | 1        | 0.40             | 0.527        | 1     | 2.17             | 0.140        |
| Soil history                 | 1       | 0.11             | 0.736        | 1       | 3.62             | <i>0.057</i> | 1        | 2.32             | 0.128        | 1     | 0.05             | 0.821        |
| Soil treatment               | 2       | 0.36             | 0.835        | 2       | 1.42             | 0.492        | 2        | 1.18             | 0.555        | 2     | 3.91             | 0.141        |
| SLA                          |         |                  |              |         |                  |              |          |                  |              |       |                  |              |
|                              | Control |                  |              | Drought |                  |              | Nitrogen |                  |              | D x N |                  |              |
|                              | Df      | Chi <sup>2</sup> | P            | Df      | Chi <sup>2</sup> | P            | Df       | Chi <sup>2</sup> | P            | Df    | Chi <sup>2</sup> | P            |
| Plant history                | 1       | 0.07             | 0.786        | 1       | 0.32             | 0.572        | 1        | 0.00             | 0.984        | 1     | 1.28             | 0.259        |
| Soil history                 | 1       | 0.20             | 0.654        | 1       | 2.81             | <i>0.094</i> | 1        | 0.23             | 0.632        | 1     | 0.05             | 0.828        |
| Soil treatment               | 2       | 2.21             | 0.331        | 2       | 0.70             | 0.704        | 2        | 1.18             | 0.555        | 2     | 8.59             | <b>0.014</b> |
| Stomatal conductance         |         |                  |              |         |                  |              |          |                  |              |       |                  |              |
|                              | Control |                  |              | Drought |                  |              | Nitrogen |                  |              | D x N |                  |              |
|                              | Df      | Chi <sup>2</sup> | P            | Df      | Chi <sup>2</sup> | P            | Df       | Chi <sup>2</sup> | P            | Df    | Chi <sup>2</sup> | P            |
| Temperature                  | 1       | 1.17             | 0.279        | 1       | 0.22             | 0.642        | 1        | 0.44             | 0.507        | 1     | 0.17             | 0.678        |
| Daytime                      | 1       | 0.77             | 0.379        | 1       | 0.07             | 0.786        | 1        | 1.13             | 0.289        | 1     | 8.38             | <b>0.004</b> |
| Plant history                | 1       | 0.05             | 0.824        | 1       | 0.16             | 0.690        | 1        | 0.66             | 0.415        | 1     | 0.61             | 0.436        |
| Soil history                 | 1       | 1.30             | 0.255        | 1       | 0.14             | 0.706        | 1        | 0.79             | 0.373        | 1     | 0.53             | 0.466        |
| Soil treatment               | 2       | 2.35             | 0.308        | 2       | 4.41             | 0.110        | 2        | 2.55             | <b>0.002</b> | 2     | 1.59             | 0.452        |
| Root diameter                |         |                  |              |         |                  |              |          |                  |              |       |                  |              |
|                              | Control |                  |              | Drought |                  |              | Nitrogen |                  |              | D x N |                  |              |
|                              | Df      | Chi <sup>2</sup> | P            | Df      | Chi <sup>2</sup> | P            | Df       | Chi <sup>2</sup> | P            | Df    | Chi <sup>2</sup> | P            |
| Plant history                | 1       | 0.28             | 0.595        | 1       | 0.18             | 0.673        | 1        | 0.20             | 0.653        | 1     | 0.09             | 0.770        |
| Soil history                 | 1       | 5.61             | <b>0.018</b> | 1       | 0.95             | 0.331        | 1        | 1.34             | 0.246        | 1     | 0.01             | 0.942        |
| Soil treatment               | 2       | 1.02             | 0.602        | 2       | 0.29             | 0.865        | 2        | 1.25             | 0.535        | 2     | 6.06             | <b>0.048</b> |
| SRL                          |         |                  |              |         |                  |              |          |                  |              |       |                  |              |
|                              | Control |                  |              | Drought |                  |              | Nitrogen |                  |              | D x N |                  |              |
|                              | Df      | Chi <sup>2</sup> | P            | Df      | Chi <sup>2</sup> | P            | Df       | Chi <sup>2</sup> | P            | Df    | Chi <sup>2</sup> | P            |
| Plant history                | 1       | 0.42             | 0.515        | 1       | 0.24             | 0.623        | 1        | 0.61             | 0.435        | 1     | 0.01             | 0.916        |
| Soil history                 | 1       | 0.33             | 0.567        | 1       | 7.10             | <b>0.008</b> | 1        | 0.17             | 0.677        | 1     | 2.73             | <i>0.098</i> |
| Soil treatment               | 2       | 5.24             | <i>0.073</i> | 2       | 0.88             | 0.644        | 2        | 0.11             | 0.945        | 2     | 6.03             | <b>0.049</b> |
| RLD                          |         |                  |              |         |                  |              |          |                  |              |       |                  |              |
|                              | Control |                  |              | Drought |                  |              | Nitrogen |                  |              | D x N |                  |              |
|                              | Df      | Chi <sup>2</sup> | P            | Df      | Chi <sup>2</sup> | P            | Df       | Chi <sup>2</sup> | P            | Df    | Chi <sup>2</sup> | P            |
| Plant history                | 1       | 0.28             | 0.595        | 1       | 0.12             | 0.729        | 1        | 0.08             | 0.781        | 1     | 0.09             | 0.763        |
| Soil history                 | 1       | 0.75             | 0.387        | 1       | 4.79             | <b>0.029</b> | 1        | 0.13             | 0.716        | 1     | 0.03             | 0.861        |
| Soil treatment               | 2       | 0.28             | 0.869        | 2       | 2.39             | 0.303        | 2        | 0.19             | 0.909        | 2     | 3.02             | 0.221        |

1181 **Table S4** Summary of mixed-effect model analyses testing the effects of legacy treatments (plant  
 1182 history, soil history, soil treatment) on plant trait expressions of *D. glomerata*, when non-treated  
 1183 (control) or treated with GC drivers (drought, nitrogen input, drought and nitrogen input (D x N)).  
 1184 Shown are degrees of freedom (Df), Chi<sup>2</sup> and P-values (P). Significant effects (P < 0.05) are given in  
 1185 bold, marginally significant effects (P < 0.1) in italics.  
 1186

| <i>D. glomerata</i>          |               |                  |                  |              |                  |                  |              |                  |              |       |                  |              |
|------------------------------|---------------|------------------|------------------|--------------|------------------|------------------|--------------|------------------|--------------|-------|------------------|--------------|
|                              | Growth height |                  |                  |              |                  |                  |              |                  |              |       |                  |              |
|                              | Control       |                  |                  | Drought      |                  |                  | Nitrogen     |                  |              | D x N |                  |              |
|                              | Df            | Chi <sup>2</sup> | P                | Df           | Chi <sup>2</sup> | P                | Df           | Chi <sup>2</sup> | P            | Df    | Chi <sup>2</sup> | P            |
| Plant history                | 1             | 0.73             | 0.394            | 1            | 0.11             | 0.741            | 1            | 0.06             | 0.802        | 1     | 0.01             | 0.912        |
| Soil history                 | 1             | 0.69             | 0.405            | 1            | 0.91             | 0.340            | 1            | 1.25             | 0.263        | 1     | 0.18             | 0.675        |
| Soil treatment               | 2             | 1.66             | 0.436            | 2            | 1.06             | 0.589            | 2            | 2.37             | 0.306        | 2     | 1.09             | 0.581        |
| Shoot nitrogen concentration |               |                  |                  |              |                  |                  |              |                  |              |       |                  |              |
|                              | Control       |                  |                  | Drought      |                  |                  | Nitrogen     |                  |              | D x N |                  |              |
|                              | Df            | Chi <sup>2</sup> | P                | Df           | Chi <sup>2</sup> | P                | Df           | Chi <sup>2</sup> | P            | Df    | Chi <sup>2</sup> | P            |
|                              | Plant history | 1                | 1.13             | 0.289        | 1                | 0.56             | 0.455        | 1                | 2.38         | 0.123 | 1                | 0.56         |
| Soil history                 | 1             | <0.01            | 0.952            | 1            | 2.18             | 0.140            | 1            | 8.44             | <b>0.004</b> | 1     | 0.05             | 0.818        |
| Soil treatment               | 2             | 2.72             | 0.257            | 2            | 2.46             | 0.293            | 2            | 3.07             | 0.215        | 2     | 0.71             | 0.701        |
| Leaf greenness               |               |                  |                  |              |                  |                  |              |                  |              |       |                  |              |
|                              | Control       |                  |                  | Drought      |                  |                  | Nitrogen     |                  |              | D x N |                  |              |
|                              | Df            | Chi <sup>2</sup> | P                | Df           | Chi <sup>2</sup> | P                | Df           | Chi <sup>2</sup> | P            | Df    | Chi <sup>2</sup> | P            |
|                              | Plant history | 1                | 4.93             | <b>0.026</b> | 1                | 0.02             | 0.886        | 1                | 0.17         | 0.680 | 1                | 0.13         |
| Soil history                 | 1             | 1.23             | 0.267            | 1            | 1.17             | 0.279            | 1            | 0.15             | 0.703        | 1     | 0.01             | 0.908        |
| Soil treatment               | 2             | 2.33             | 0.313            | 2            | 3.58             | 0.167            | 2            | 1.16             | 0.560        | 2     | 0.68             | 0.713        |
| LDMC                         |               |                  |                  |              |                  |                  |              |                  |              |       |                  |              |
|                              | Control       |                  |                  | Drought      |                  |                  | Nitrogen     |                  |              | D x N |                  |              |
|                              | Df            | Chi <sup>2</sup> | P                | Df           | Chi <sup>2</sup> | P                | Df           | Chi <sup>2</sup> | P            | Df    | Chi <sup>2</sup> | P            |
|                              | Plant history | 1                | 0.86             | 0.353        | 1                | 1.18             | 0.278        | 1                | 0.37         | 0.540 | 1                | 0.64         |
| Soil history                 | 1             | 2.03             | 0.154            | 1            | 0.12             | 0.727            | 1            | 2.21             | 0.137        | 1     | 0.28             | 0.594        |
| Soil treatment               | 2             | 2.36             | 0.307            | 2            | 0.20             | 0.905            | 2            | 1.74             | 0.418        | 2     | 3.05             | 0.218        |
| SLA                          |               |                  |                  |              |                  |                  |              |                  |              |       |                  |              |
|                              | Control       |                  |                  | Drought      |                  |                  | Nitrogen     |                  |              | D x N |                  |              |
|                              | Df            | Chi <sup>2</sup> | P                | Df           | Chi <sup>2</sup> | P                | Df           | Chi <sup>2</sup> | P            | Df    | Chi <sup>2</sup> | P            |
|                              | Plant history | 1                | 1.41             | 0.235        | 1                | 0.01             | 0.904        | 1                | 1.50         | 0.220 | 1                | 0.14         |
| Soil history                 | 1             | 2.29             | 0.130            | 1            | 0.28             | 0.595            | 1            | 3.86             | <b>0.050</b> | 1     | 0.02             | 0.888        |
| Soil treatment               | 2             | 2.60             | 0.272            | 2            | 1.88             | 0.392            | 2            | 0.09             | 0.956        | 2     | 0.89             | 0.641        |
| Stomatal conductance         |               |                  |                  |              |                  |                  |              |                  |              |       |                  |              |
|                              | Control       |                  |                  | Drought      |                  |                  | Nitrogen     |                  |              | D x N |                  |              |
|                              | Df            | Chi <sup>2</sup> | P                | Df           | Chi <sup>2</sup> | P                | Df           | Chi <sup>2</sup> | P            | Df    | Chi <sup>2</sup> | P            |
|                              | Temperature   | 1                | 1.12             | 0.289        | 1                | <0.01            | 0.951        | 1                | 0.04         | 0.843 | 1                | 0.08         |
| Daytime                      | 1             | 24.06            | <b>&lt;0.001</b> | 1            | 12.16            | <b>&lt;0.001</b> | 1            | 4.04             | <b>0.044</b> | 1     | 4.37             | <b>0.037</b> |
| Plant history                | 1             | 3.77             | 0.052            | 1            | 1.05             | 0.304            | 1            | 1.79             | 0.181        | 1     | 4.89             | <b>0.027</b> |
| Soil history                 | 1             | 1.44             | 0.231            | 1            | 1.55             | 0.214            | 1            | 0.47             | 0.493        | 1     | 2.34             | 0.126        |
| Soil treatment               | 2             | 0.43             | 0.805            | 2            | 1.62             | 0.445            | 2            | 0.27             | 0.872        | 2     | 1.04             | 0.595        |
| Root diameter                |               |                  |                  |              |                  |                  |              |                  |              |       |                  |              |
|                              | Control       |                  |                  | Drought      |                  |                  | Nitrogen     |                  |              | D x N |                  |              |
|                              | Df            | Chi <sup>2</sup> | P                | Df           | Chi <sup>2</sup> | P                | Df           | Chi <sup>2</sup> | P            | Df    | Chi <sup>2</sup> | P            |
|                              | Plant history | 1                | 0.64             | 0.422        | 1                | 0.02             | 0.876        | 1                | 1.83         | 0.176 | 1                | 2.43         |
| Soil history                 | 1             | 0.33             | 0.567            | 1            | 2.50             | 0.114            | 1            | 0.34             | 0.559        | 1     | 0.16             | 0.691        |
| Soil treatment               | 2             | 0.60             | 0.741            | 2            | 3.21             | 0.201            | 2            | 0.16             | 0.924        | 2     | 2.03             | 0.363        |
| SRL                          |               |                  |                  |              |                  |                  |              |                  |              |       |                  |              |
|                              | Control       |                  |                  | Drought      |                  |                  | Nitrogen     |                  |              | D x N |                  |              |
|                              | Df            | Chi <sup>2</sup> | P                | Df           | Chi <sup>2</sup> | P                | Df           | Chi <sup>2</sup> | P            | Df    | Chi <sup>2</sup> | P            |
|                              | Plant history | 1                | 2.55             | 0.111        | 1                | 0.54             | 0.462        | 1                | 0.08         | 0.777 | 1                | 0.36         |
| Soil history                 | 1             | 1.73             | 0.188            | 1            | 1.42             | 0.233            | 1            | 0.32             | 0.570        | 1     | 0.22             | 0.643        |
| Soil treatment               | 2             | 2.23             | 0.329            | 2            | 0.24             | 0.888            | 2            | 2.28             | 0.320        | 2     | 2.38             | 0.304        |
| RLD                          |               |                  |                  |              |                  |                  |              |                  |              |       |                  |              |
|                              | Control       |                  |                  | Drought      |                  |                  | Nitrogen     |                  |              | D x N |                  |              |
|                              | Df            | Chi <sup>2</sup> | P                | Df           | Chi <sup>2</sup> | P                | Df           | Chi <sup>2</sup> | P            | Df    | Chi <sup>2</sup> | P            |
|                              | Plant history | 1                | 0.01             | 0.923        | 1                | 7.58             | <b>0.006</b> | 1                | 0.77         | 0.380 | 1                | 0.03         |
| Soil history                 | 1             | 0.27             | 0.602            | 1            | 0.02             | 0.901            | 1            | 0.54             | 0.464        | 1     | 0.18             | 0.673        |
| Soil treatment               | 2             | 0.36             | 0.835            | 2            | 4.51             | 0.105            | 2            | 0.96             | 0.619        | 2     | 5.25             | 0.073        |

1187 **Table S5** Summary of mixed-effect model analyses testing the effects of legacy treatments (plant  
 1188 history, soil history, soil treatment) on plant trait expressions of *P. trivialis*, when non-treated (control)  
 1189 or treated with GC drivers (drought, nitrogen input, drought and nitrogen input (D x N)). Shown are  
 1190 degrees of freedom (Df), Chi<sup>2</sup> and P-values (P). Significant effects (P < 0.05) are given in bold,  
 1191 marginally significant effects (P < 0.1) in italics.  
 1192

| <i>P. trivialis</i>          |               |                  |              |              |                  |              |              |                  |              |              |                  |              |
|------------------------------|---------------|------------------|--------------|--------------|------------------|--------------|--------------|------------------|--------------|--------------|------------------|--------------|
|                              | Growth height |                  |              |              |                  |              |              |                  |              |              |                  |              |
|                              | Control       |                  |              | Drought      |                  |              | Nitrogen     |                  |              | D x N        |                  |              |
|                              | Df            | Chi <sup>2</sup> | P            | Df           | Chi <sup>2</sup> | P            | Df           | Chi <sup>2</sup> | P            | Df           | Chi <sup>2</sup> | P            |
| Plant history                | 1             | 2.81             | <i>0.094</i> | 1            | 0.32             | 0.571        | 1            | 0.98             | 0.323        | 1            | 0.16             | 0.688        |
| Soil history                 | 1             | 0.62             | 0.429        | 1            | 0.92             | 0.338        | 1            | 1.12             | 0.289        | 1            | 5.02             | <b>0.025</b> |
| Soil treatment               | 2             | 4.77             | <i>0.092</i> | 2            | 1.59             | 0.452        | 2            | 2.99             | 0.224        | 2            | 1.14             | 0.566        |
| Shoot nitrogen concentration |               |                  |              |              |                  |              |              |                  |              |              |                  |              |
|                              | Control       |                  |              | Drought      |                  |              | Nitrogen     |                  |              | D x N        |                  |              |
|                              | Df            | Chi <sup>2</sup> | P            | Df           | Chi <sup>2</sup> | P            | Df           | Chi <sup>2</sup> | P            | Df           | Chi <sup>2</sup> | P            |
|                              | Plant history | 1                | <0.01        | 0.986        | 1                | 0.01         | 0.934        | 1                | 0.07         | 0.785        | 1                | 0.01         |
| Soil history                 | 1             | 0.15             | 0.695        | 1            | 0.57             | 0.452        | 1            | 0.06             | 0.802        | 1            | 0.45             | 0.503        |
| Soil treatment               | 2             | 9.66             | <b>0.008</b> | 2            | 2.33             | 0.313        | 2            | 1.18             | 0.554        | 2            | 3.86             | 0.145        |
| Leaf greenness               |               |                  |              |              |                  |              |              |                  |              |              |                  |              |
|                              | Control       |                  |              | Drought      |                  |              | Nitrogen     |                  |              | D x N        |                  |              |
|                              | Df            | Chi <sup>2</sup> | P            | Df           | Chi <sup>2</sup> | P            | Df           | Chi <sup>2</sup> | P            | Df           | Chi <sup>2</sup> | P            |
|                              | Plant history | 1                | 0.14         | 0.708        | 1                | 2.41         | 0.120        | 1                | 0.04         | 0.845        | 1                | 2.35         |
| Soil history                 | 1             | 1.41             | 0.236        | 1            | 1.10             | 0.295        | 1            | 0.38             | 0.537        | 1            | 0.09             | 0.769        |
| Soil treatment               | 2             | 0.13             | 0.936        | 2            | 0.37             | 0.833        | 2            | 5.22             | <i>0.074</i> | 2            | 0.97             | 0.616        |
| LDMC                         |               |                  |              |              |                  |              |              |                  |              |              |                  |              |
|                              | Control       |                  |              | Drought      |                  |              | Nitrogen     |                  |              | D x N        |                  |              |
|                              | Df            | Chi <sup>2</sup> | P            | Df           | Chi <sup>2</sup> | P            | Df           | Chi <sup>2</sup> | P            | Df           | Chi <sup>2</sup> | P            |
|                              | Plant history | 1                | 0.81         | 0.369        | 1                | 0.24         | 0.627        | 1                | 0.05         | 0.826        | 1                | 1.34         |
| Soil history                 | 1             | 0.08             | 0.776        | 1            | 0.01             | 0.927        | 1            | 0.47             | 0.492        | 1            | 4.25             | <b>0.039</b> |
| Soil treatment               | 2             | 3.34             | 0.188        | 2            | 0.72             | 0.696        | 2            | 3.01             | 0.222        | 2            | 2.64             | 0.268        |
| SLA                          |               |                  |              |              |                  |              |              |                  |              |              |                  |              |
|                              | Control       |                  |              | Drought      |                  |              | Nitrogen     |                  |              | D x N        |                  |              |
|                              | Df            | Chi <sup>2</sup> | P            | Df           | Chi <sup>2</sup> | P            | Df           | Chi <sup>2</sup> | P            | Df           | Chi <sup>2</sup> | P            |
|                              | Plant history | 1                | 0.26         | 0.611        | 1                | 0.21         | 0.643        | 1                | 1.44         | 0.231        | 1                | 0.80         |
| Soil history                 | 1             | 0.41             | 0.522        | 1            | 0.40             | 0.528        | 1            | 1.47             | 0.226        | 1            | 0.33             | 0.565        |
| Soil treatment               | 2             | 2.29             | 0.319        | 2            | 0.53             | 0.769        | 2            | 3.35             | 0.187        | 2            | 4.08             | 0.130        |
| Stomatal conductance         |               |                  |              |              |                  |              |              |                  |              |              |                  |              |
|                              | Control       |                  |              | Drought      |                  |              | Nitrogen     |                  |              | D x N        |                  |              |
|                              | Df            | Chi <sup>2</sup> | P            | Df           | Chi <sup>2</sup> | P            | Df           | Chi <sup>2</sup> | P            | Df           | Chi <sup>2</sup> | P            |
|                              | Temperature   | 1                | 10.96        | <b>0.001</b> | 1                | 8.08         | <b>0.004</b> | 1                | 7.25         | <b>0.007</b> | 1                | 4.31         |
| Daytime                      | 1             | 3.93             | <b>0.047</b> | 1            | 1.12             | 0.289        | 1            | 1.22             | 0.270        | 1            | 6.35             | <b>0.012</b> |
| Plant history                | 1             | <0.01            | 0.949        | 1            | 0.60             | 0.439        | 1            | 2.96             | <i>0.085</i> | 1            | 0.29             | 0.589        |
| Soil history                 | 1             | 0.68             | 0.410        | 1            | 0.95             | 0.330        | 1            | 2.72             | <i>0.099</i> | 1            | 0.14             | 0.704        |
| Soil treatment               | 2             | 2.46             | 0.293        | 2            | 0.54             | 0.763        | 2            | 0.95             | 0.622        | 2            | 1.49             | 0.474        |
| Root diameter                |               |                  |              |              |                  |              |              |                  |              |              |                  |              |
|                              | Control       |                  |              | Drought      |                  |              | Nitrogen     |                  |              | D x N        |                  |              |
|                              | Df            | Chi <sup>2</sup> | P            | Df           | Chi <sup>2</sup> | P            | Df           | Chi <sup>2</sup> | P            | Df           | Chi <sup>2</sup> | P            |
|                              | Plant history | 1                | 0.16         | 0.686        | 1                | 0.07         | 0.794        | 1                | 0.55         | 0.458        | 1                | 2.91         |
| Soil history                 | 1             | 3.06             | <i>0.080</i> | 1            | 0.31             | 0.579        | 1            | 0.95             | 0.329        | 1            | 0.06             | 0.800        |
| Soil treatment               | 2             | 7.48             | <b>0.024</b> | 2            | 0.28             | 0.870        | 2            | 0.07             | 0.967        | 2            | 2.00             | 0.369        |
| SRL                          |               |                  |              |              |                  |              |              |                  |              |              |                  |              |
|                              | Control       |                  |              | Drought      |                  |              | Nitrogen     |                  |              | D x N        |                  |              |
|                              | Df            | Chi <sup>2</sup> | P            | Df           | Chi <sup>2</sup> | P            | Df           | Chi <sup>2</sup> | P            | Df           | Chi <sup>2</sup> | P            |
|                              | Plant history | 1                | 2.10         | 0.147        | 1                | 0.94         | 0.332        | 1                | 1.82         | 0.178        | 1                | 1.04         |
| Soil history                 | 1             | 1.83             | 0.177        | 1            | 3.68             | <i>0.055</i> | 1            | 2.26             | 0.133        | 1            | 0.19             | 0.660        |
| Soil treatment               | 2             | 5.73             | <i>0.057</i> | 2            | 0.56             | 0.755        | 2            | 1.97             | 0.374        | 2            | 1.83             | 0.401        |
| RLD                          |               |                  |              |              |                  |              |              |                  |              |              |                  |              |
|                              | Control       |                  |              | Drought      |                  |              | Nitrogen     |                  |              | D x N        |                  |              |
|                              | Df            | Chi <sup>2</sup> | P            | Df           | Chi <sup>2</sup> | P            | Df           | Chi <sup>2</sup> | P            | Df           | Chi <sup>2</sup> | P            |
|                              | Plant history | 1                | 0.23         | 0.632        | 1                | 0.01         | 0.904        | 1                | 0.01         | 0.920        | 1                | 0.54         |
| Soil history                 | 1             | 3.38             | <i>0.066</i> | 1            | 0.07             | 0.792        | 1            | 0.01             | 0.926        | 1            | 0.16             | 0.685        |
| Soil treatment               | 2             | 0.63             | 0.731        | 2            | 0.61             | 0.739        | 2            | 0.16             | 0.924        | 2            | 3.25             | 0.197        |

1193 **Table S6** Summary of mixed-effect model analyses testing the effects of legacy treatments (plant  
 1194 history, soil history, soil treatment) on mildew infestation of *D. glomerata* and *P. trivialis*, when non-  
 1195 treated (control) or treated with GC drivers (drought, nitrogen input, drought and nitrogen input (D x  
 1196 N)). Shown are degrees of freedom (Df), Chi<sup>2</sup> and P-values (P). Significant effects (P < 0.05) are  
 1197 given in bold, marginally significant effects (P < 0.1) in italics.  
 1198

| Mildew infestation | <i>D. glomerata</i> |                  |              |         |                  |              |          |                  |       |       |                  |       |
|--------------------|---------------------|------------------|--------------|---------|------------------|--------------|----------|------------------|-------|-------|------------------|-------|
|                    | Control             |                  |              | Drought |                  |              | Nitrogen |                  |       | D x N |                  |       |
|                    | Df                  | Chi <sup>2</sup> | P            | Df      | Chi <sup>2</sup> | P            | Df       | Chi <sup>2</sup> | P     | Df    | Chi <sup>2</sup> | P     |
| Plant history      | 1                   | 0.58             | 0.447        | 1       | 1.18             | 0.277        | 1        | 0.88             | 0.348 | 1     | 0.26             | 0.613 |
| Soil history       | 1                   | 0.41             | 0.522        | 1       | 2.63             | 0.105        | 1        | <0.01            | 0.946 | 1     | 0.11             | 0.746 |
| Soil treatment     | 2                   | 6.01             | <b>0.049</b> | 2       | 7.65             | <b>0.022</b> | 2        | 0.93             | 0.628 | 2     | 0.09             | 0.958 |
|                    | <i>P. trivialis</i> |                  |              |         |                  |              |          |                  |       |       |                  |       |
|                    | Control             |                  |              | Drought |                  |              | Nitrogen |                  |       | D x N |                  |       |
|                    | Df                  | Chi <sup>2</sup> | P            | Df      | Chi <sup>2</sup> | P            | Df       | Chi <sup>2</sup> | P     | Df    | Chi <sup>2</sup> | P     |
| Plant history      | 1                   | <0.01            | 0.996        | 1       | <0.01            | 0.973        | 1        | 0.03             | 0.860 | 1     | 0.21             | 0.647 |
| Soil history       | 1                   | 1.20             | 0.274        | 1       | 2.66             | 0.103        | 1        | 1.68             | 0.195 | 1     | 0.05             | 0.817 |
| Soil treatment     | 2                   | 3.94             | 0.139        | 2       | 1.78             | 0.412        | 2        | 0.16             | 0.921 | 2     | 2.10             | 0.350 |

1199



1200 Biomass production

1201

1202 **Table S7** Summary of mixed-effect model analyses testing the effects of species identity (N = 4),  
 1203 legacy treatments (plant history, soil history, soil treatment) and their interactions on root-shoot ratio,  
 1204 when non-treated (control) or treated with global change drivers (drought, nitrogen input, drought  
 1205 and nitrogen input (D x N)). Shown are degrees of freedom (Df), Chi<sup>2</sup> and P-values (P). Significant  
 1206 effects (P < 0.05) are given in bold, marginally significant effects (P < 0.1) in italics.

1207

|                     | Root-Shoot ratio |                  |                  |         |                  |                  |          |                  |                  |       |                  |                  |
|---------------------|------------------|------------------|------------------|---------|------------------|------------------|----------|------------------|------------------|-------|------------------|------------------|
|                     | Control          |                  |                  | Drought |                  |                  | Nitrogen |                  |                  | D x N |                  |                  |
|                     | Df               | Chi <sup>2</sup> | P                | Df      | Chi <sup>2</sup> | P                | Df       | Chi <sup>2</sup> | P                | Df    | Chi <sup>2</sup> | P                |
| Species ID          | 3                | 115.37           | <b>&lt;0.001</b> | 3       | 116.36           | <b>&lt;0.001</b> | 3        | 101.12           | <b>&lt;0.001</b> | 3     | 108.37           | <b>&lt;0.001</b> |
| Plant history (PH)  | 1                | 0.02             | 0.880            | 1       | 1.48             | 0.225            | 1        | 1.64             | 0.200            | 1     | 0.46             | 0.496            |
| Soil history (SH)   | 1                | 1.81             | 0.178            | 1       | 1.60             | 0.206            | 1        | 0.24             | 0.622            | 1     | <0.01            | 0.992            |
| Soil treatment (ST) | 2                | 0.46             | 0.793            | 2       | 1.96             | 0.376            | 2        | 1.19             | 0.551            | 2     | 3.54             | 0.170            |
| Species ID x PH     | 3                | 3.88             | 0.275            | 3       | 1.47             | 0.690            | 3        | 0.86             | 0.836            | 3     | 2.77             | 0.428            |
| Species ID x SH     | 3                | 5.98             | 0.113            | 3       | 3.99             | 0.263            | 3        | 2.53             | 0.471            | 3     | 3.71             | 0.295            |
| Species ID x ST     | 6                | 10.54            | 0.104            | 6       | 6.76             | 0.344            | 6        | 1.85             | 0.933            | 6     | 14.79            | <b>0.022</b>     |

1208

1209

1210 **Table S8** Summary of mixed-effect model analyses testing the effects of legacy treatments (plant  
 1211 history, soil history, soil treatment) on plant performance (total biomass, shoot biomass, root  
 1212 biomass and root-shoot ratio) of *A. elatius*, when non-treated (control) or treated with GC drivers  
 1213 (drought, nitrogen input, drought and nitrogen input (D x N)). Shown are degrees of freedom (Df),  
 1214 Chi<sup>2</sup> and P-values (P). Significant effects (P < 0.05) are given in bold, marginally significant effects  
 1215 (P < 0.1) in italics.

1216

| <i>A. elatius</i> | Total biomass    |                  |              |         |                  |       |          |                  |              |       |                  |       |
|-------------------|------------------|------------------|--------------|---------|------------------|-------|----------|------------------|--------------|-------|------------------|-------|
|                   | Control          |                  |              | Drought |                  |       | Nitrogen |                  |              | D x N |                  |       |
|                   | Df               | Chi <sup>2</sup> | P            | Df      | Chi <sup>2</sup> | P     | Df       | Chi <sup>2</sup> | P            | Df    | Chi <sup>2</sup> | P     |
| Plant history     | 1                | 0.35             | 0.557        | 1       | 0.82             | 0.364 | 1        | 0.71             | 0.401        | 1     | 0.26             | 0.613 |
| Soil history      | 1                | 1.08             | 0.298        | 1       | 0.76             | 0.383 | 1        | 0.06             | 0.811        | 1     | 0.47             | 0.494 |
| Soil treatment    | 2                | 0.10             | 0.949        | 2       | 2.91             | 0.233 | 2        | 6.44             | <b>0.040</b> | 2     | 0.99             | 0.610 |
|                   | Shoot biomass    |                  |              |         |                  |       |          |                  |              |       |                  |       |
|                   | Control          |                  |              | Drought |                  |       | Nitrogen |                  |              | D x N |                  |       |
|                   | Df               | Chi <sup>2</sup> | P            | Df      | Chi <sup>2</sup> | P     | Df       | Chi <sup>2</sup> | P            | Df    | Chi <sup>2</sup> | P     |
| Plant history     | 1                | 0.12             | 0.726        | 1       | 3.36             | 0.067 | 1        | 1.27             | 0.260        | 1     | 0.01             | 0.904 |
| Soil history      | 1                | 0.35             | 0.556        | 1       | 0.24             | 0.621 | 1        | 0.55             | 0.460        | 1     | 0.63             | 0.428 |
| Soil treatment    | 2                | 2.08             | 0.354        | 2       | 2.89             | 0.236 | 2        | 5.24             | 0.073        | 2     | 0.98             | 0.613 |
|                   | Root biomass     |                  |              |         |                  |       |          |                  |              |       |                  |       |
|                   | Control          |                  |              | Drought |                  |       | Nitrogen |                  |              | D x N |                  |       |
|                   | Df               | Chi <sup>2</sup> | P            | Df      | Chi <sup>2</sup> | P     | Df       | Chi <sup>2</sup> | P            | Df    | Chi <sup>2</sup> | P     |
| Plant history     | 1                | 0.03             | 0.860        | 1       | 0.15             | 0.701 | 1        | 0.01             | 0.916        | 1     | 0.36             | 0.551 |
| Soil history      | 1                | 3.81             | 0.051        | 1       | 0.62             | 0.433 | 1        | 0.17             | 0.676        | 1     | 0.22             | 0.636 |
| Soil treatment    | 2                | 2.05             | 0.359        | 2       | 2.38             | 0.304 | 2        | 2.25             | 0.325        | 2     | 1.68             | 0.432 |
|                   | Root-shoot ratio |                  |              |         |                  |       |          |                  |              |       |                  |       |
|                   | Control          |                  |              | Drought |                  |       | Nitrogen |                  |              | D x N |                  |       |
|                   | Df               | Chi <sup>2</sup> | P            | Df      | Chi <sup>2</sup> | P     | Df       | Chi <sup>2</sup> | P            | Df    | Chi <sup>2</sup> | P     |
| Plant history     | 1                | 0.07             | 0.797        | 1       | 1.62             | 0.203 | 1        | 0.16             | 0.691        | 1     | 0.31             | 0.576 |
| Soil history      | 1                | 4.86             | <b>0.027</b> | 1       | 0.24             | 0.626 | 1        | 0.50             | 0.479        | 1     | 0.07             | 0.787 |
| Soil treatment    | 2                | 3.11             | 0.211        | 2       | 2.39             | 0.302 | 2        | 0.18             | 0.915        | 2     | 1.88             | 0.391 |

1217

1218 **Table S9** Summary of mixed-effect model analyses testing the effects of legacy treatments (plant  
 1219 history, soil history, soil treatment) on plant performance (total biomass, shoot biomass, root biomass  
 1220 and root-shoot ratio) of *A. pratensis*, when non-treated (control) or treated with GC drivers (drought,  
 1221 nitrogen input, drought and nitrogen input (D x N)). Shown are degrees of freedom (Df), Chi<sup>2</sup> and P-  
 1222 values (P). Significant effects (P < 0.05) are given in bold, marginally significant effects (P < 0.1) in  
 1223 italics.  
 1224

| <i>A. pratensis</i> |                  |                  |       |         |                  |              |          |                  |              |       |                  |              |
|---------------------|------------------|------------------|-------|---------|------------------|--------------|----------|------------------|--------------|-------|------------------|--------------|
|                     | Total biomass    |                  |       |         |                  |              |          |                  |              |       |                  |              |
|                     | Control          |                  |       | Drought |                  |              | Nitrogen |                  |              | D x N |                  |              |
|                     | Df               | Chi <sup>2</sup> | P     | Df      | Chi <sup>2</sup> | P            | Df       | Chi <sup>2</sup> | P            | Df    | Chi <sup>2</sup> | P            |
| Plant history       | 1                | 0.05             | 0.820 | 1       | 0.27             | 0.603        | 1        | 1.63             | 0.202        | 1     | 1.44             | 0.230        |
| Soil history        | 1                | 0.02             | 0.879 | 1       | 1.05             | 0.306        | 1        | 2.97             | <i>0.085</i> | 1     | 2.07             | 0.151        |
| Soil treatment      | 2                | 3.43             | 0.180 | 2       | 0.17             | 0.917        | 2        | 1.29             | 0.525        | 2     | 2.80             | 0.247        |
|                     | Shoot biomass    |                  |       |         |                  |              |          |                  |              |       |                  |              |
|                     | Control          |                  |       | Drought |                  |              | Nitrogen |                  |              | D x N |                  |              |
|                     | Df               | Chi <sup>2</sup> | P     | Df      | Chi <sup>2</sup> | P            | Df       | Chi <sup>2</sup> | P            | Df    | Chi <sup>2</sup> | P            |
| Plant history       | 1                | 0.11             | 0.741 | 1       | 0.29             | 0.590        | 1        | 0.65             | 0.421        | 1     | 2.23             | 0.135        |
| Soil history        | 1                | 0.14             | 0.710 | 1       | 0.33             | 0.564        | 1        | 0.86             | 0.354        | 1     | <0.01            | 0.971        |
| Soil treatment      | 2                | 0.15             | 0.927 | 2       | 1.84             | 0.398        | 2        | 1.03             | 0.596        | 2     | 1.35             | 0.509        |
|                     | Root biomass     |                  |       |         |                  |              |          |                  |              |       |                  |              |
|                     | Control          |                  |       | Drought |                  |              | Nitrogen |                  |              | D x N |                  |              |
|                     | Df               | Chi <sup>2</sup> | P     | Df      | Chi <sup>2</sup> | P            | Df       | Chi <sup>2</sup> | P            | Df    | Chi <sup>2</sup> | P            |
| Plant history       | 1                | 0.13             | 0.719 | 1       | 0.23             | 0.629        | 1        | 0.97             | 0.324        | 1     | 0.47             | 0.495        |
| Soil history        | 1                | 0.15             | 0.703 | 1       | 1.16             | 0.281        | 1        | 1.83             | 0.176        | 1     | 3.98             | <b>0.046</b> |
| Soil treatment      | 2                | 2.78             | 0.250 | 2       | 1.38             | 0.501        | 2        | 0.47             | 0.789        | 2     | 3.16             | 0.206        |
|                     | Root-shoot ratio |                  |       |         |                  |              |          |                  |              |       |                  |              |
|                     | Control          |                  |       | Drought |                  |              | Nitrogen |                  |              | D x N |                  |              |
|                     | Df               | Chi <sup>2</sup> | P     | Df      | Chi <sup>2</sup> | P            | Df       | Chi <sup>2</sup> | P            | Df    | Chi <sup>2</sup> | P            |
| Plant history       | 1                | 0.13             | 0.719 | 1       | 0.01             | 0.920        | 1        | 0.30             | 0.584        | 1     | 0.90             | 0.342        |
| Soil history        | 1                | 0.20             | 0.654 | 1       | 0.31             | 0.579        | 1        | 0.42             | 0.517        | 1     | 4.57             | <b>0.033</b> |
| Soil treatment      | 2                | 1.33             | 0.514 | 2       | 4.94             | <i>0.084</i> | 2        | 0.04             | 0.982        | 2     | 0.37             | 0.832        |

1225

1226

1227 **Table S10** Summary of mixed-effect model analyses testing the effects of legacy treatments (plant  
 1228 history, soil history, soil treatment) on plant performance (total biomass, shoot biomass, root  
 1229 biomass and root-shoot ratio) of *D. glomerata*, when non-treated (control) or treated with GC  
 1230 drivers (drought, nitrogen input, drought and nitrogen input (D x N)). Shown are degrees of  
 1231 freedom (Df), Chi<sup>2</sup> and P-values (P). Significant effects (P < 0.05) are given in bold, marginally  
 1232 significant effects (P < 0.1) in italics.

1233

| <i>D. glomerata</i> |         |                  |              |         |                  |       |          |                  |       |       |                  |              |
|---------------------|---------|------------------|--------------|---------|------------------|-------|----------|------------------|-------|-------|------------------|--------------|
| Total biomass       |         |                  |              |         |                  |       |          |                  |       |       |                  |              |
|                     | Control |                  |              | Drought |                  |       | Nitrogen |                  |       | D x N |                  |              |
|                     | Df      | Chi <sup>2</sup> | P            | Df      | Chi <sup>2</sup> | P     | Df       | Chi <sup>2</sup> | P     | Df    | Chi <sup>2</sup> | P            |
| Plant history       | 1       | 0.56             | 0.456        | 1       | 2.22             | 0.136 | 1        | 3.09             | 0.079 | 1     | 0.13             | 0.715        |
| Soil history        | 1       | 6.28             | <b>0.012</b> | 1       | 0.76             | 0.384 | 1        | 0.73             | 0.394 | 1     | <0.01            | 0.978        |
| Soil treatment      | 2       | 1.52             | 0.467        | 2       | 0.94             | 0.626 | 2        | 1.26             | 0.533 | 2     | 0.73             | 0.693        |
| Shoot biomass       |         |                  |              |         |                  |       |          |                  |       |       |                  |              |
|                     | Control |                  |              | Drought |                  |       | Nitrogen |                  |       | D x N |                  |              |
|                     | Df      | Chi <sup>2</sup> | P            | Df      | Chi <sup>2</sup> | P     | Df       | Chi <sup>2</sup> | P     | Df    | Chi <sup>2</sup> | P            |
| Plant history       | 1       | 0.02             | 0.885        | 1       | 1.28             | 0.259 | 1        | 3.18             | 0.075 | 1     | 0.22             | 0.640        |
| Soil history        | 1       | 8.27             | <b>0.004</b> | 1       | 0.81             | 0.369 | 1        | 0.33             | 0.567 | 1     | 0.15             | 0.700        |
| Soil treatment      | 2       | 3.06             | 0.216        | 2       | 0.44             | 0.801 | 2        | 3.34             | 0.188 | 2     | 0.14             | 0.932        |
| Root biomass        |         |                  |              |         |                  |       |          |                  |       |       |                  |              |
|                     | Control |                  |              | Drought |                  |       | Nitrogen |                  |       | D x N |                  |              |
|                     | Df      | Chi <sup>2</sup> | P            | Df      | Chi <sup>2</sup> | P     | Df       | Chi <sup>2</sup> | P     | Df    | Chi <sup>2</sup> | P            |
| Plant history       | 1       | 1.40             | 0.236        | 1       | 2.55             | 0.111 | 1        | 1.98             | 0.160 | 1     | 0.04             | 0.848        |
| Soil history        | 1       | 0.90             | 0.343        | 1       | 0.45             | 0.501 | 1        | 0.99             | 0.319 | 1     | 0.21             | 0.644        |
| Soil treatment      | 2       | 2.49             | 0.288        | 2       | 2.06             | 0.358 | 2        | 0.02             | 0.992 | 2     | 3.16             | 0.206        |
| Root-shoot ratio    |         |                  |              |         |                  |       |          |                  |       |       |                  |              |
|                     | Control |                  |              | Drought |                  |       | Nitrogen |                  |       | D x N |                  |              |
|                     | Df      | Chi <sup>2</sup> | P            | Df      | Chi <sup>2</sup> | P     | Df       | Chi <sup>2</sup> | P     | Df    | Chi <sup>2</sup> | P            |
| Plant history       | 1       | 1.65             | 0.199        | 1       | 1.71             | 0.191 | 1        | 0.93             | 0.335 | 1     | 0.01             | 0.936        |
| Soil history        | 1       | <0.01            | 0.983        | 1       | 0.44             | 0.505 | 1        | 0.43             | 0.514 | 1     | 0.75             | 0.387        |
| Soil treatment      | 2       | 3.14             | 0.208        | 2       | 2.84             | 0.242 | 2        | 0.20             | 0.906 | 2     | 7.72             | <b>0.021</b> |

1234

1235

1236 **Table S11** Summary of mixed-effect model analyses testing the effects of legacy treatments (plant  
 1237 history, soil history, soil treatment) on plant performance (total biomass, shoot biomass, root biomass  
 1238 and root-shoot ratio) of *P. trivialis*, when non-treated (control) or treated with GC drivers (drought,  
 1239 nitrogen input, drought and nitrogen input (D x N)). Shown are degrees of freedom (Df), Chi<sup>2</sup> and P-  
 1240 values (P). Significant effects (P < 0.05) are given in bold, marginally significant effects (P < 0.1) in  
 1241 italics.  
 1242

| <i>P. trivialis</i> |                  |                  |       |         |                  |       |          |                  |       |       |                  |       |
|---------------------|------------------|------------------|-------|---------|------------------|-------|----------|------------------|-------|-------|------------------|-------|
|                     | Total biomass    |                  |       |         |                  |       |          |                  |       |       |                  |       |
|                     | Control          |                  |       | Drought |                  |       | Nitrogen |                  |       | D x N |                  |       |
|                     | Df               | Chi <sup>2</sup> | P     | Df      | Chi <sup>2</sup> | P     | Df       | Chi <sup>2</sup> | P     | Df    | Chi <sup>2</sup> | P     |
| Plant history       | 1                | 0.12             | 0.732 | 1       | 1.25             | 0.264 | 1        | 0.28             | 0.599 | 1     | 0.43             | 0.513 |
| Soil history        | 1                | 0.12             | 0.731 | 1       | 0.14             | 0.704 | 1        | 0.07             | 0.796 | 1     | 0.05             | 0.826 |
| Soil treatment      | 2                | 0.01             | 0.995 | 2       | 1.82             | 0.404 | 2        | 1.69             | 0.430 | 2     | 4.06             | 0.131 |
|                     | Shoot biomass    |                  |       |         |                  |       |          |                  |       |       |                  |       |
|                     | Control          |                  |       | Drought |                  |       | Nitrogen |                  |       | D x N |                  |       |
|                     | Df               | Chi <sup>2</sup> | P     | Df      | Chi <sup>2</sup> | P     | Df       | Chi <sup>2</sup> | P     | Df    | Chi <sup>2</sup> | P     |
| Plant history       | 1                | 0.01             | 0.920 | 1       | 1.91             | 0.167 | 1        | 0.39             | 0.532 | 1     | 0.01             | 0.943 |
| Soil history        | 1                | <0.01            | 0.973 | 1       | 0.47             | 0.492 | 1        | 0.46             | 0.499 | 1     | 0.19             | 0.663 |
| Soil treatment      | 2                | 1.34             | 0.511 | 2       | 0.81             | 0.667 | 2        | 1.22             | 0.545 | 2     | 2.96             | 0.227 |
|                     | Root biomass     |                  |       |         |                  |       |          |                  |       |       |                  |       |
|                     | Control          |                  |       | Drought |                  |       | Nitrogen |                  |       | D x N |                  |       |
|                     | Df               | Chi <sup>2</sup> | P     | Df      | Chi <sup>2</sup> | P     | Df       | Chi <sup>2</sup> | P     | Df    | Chi <sup>2</sup> | P     |
| Plant history       | 1                | 0.21             | 0.647 | 1       | 0.66             | 0.417 | 1        | 1.48             | 0.224 | 1     | 1.45             | 0.229 |
| Soil history        | 1                | 0.33             | 0.566 | 1       | 1.24             | 0.266 | 1        | 0.74             | 0.389 | 1     | 0.03             | 0.870 |
| Soil treatment      | 2                | 1.36             | 0.506 | 2       | 1.10             | 0.577 | 2        | 1.99             | 0.370 | 2     | 5.03             | 0.081 |
|                     | Root-shoot ratio |                  |       |         |                  |       |          |                  |       |       |                  |       |
|                     | Control          |                  |       | Drought |                  |       | Nitrogen |                  |       | D x N |                  |       |
|                     | Df               | Chi <sup>2</sup> | P     | Df      | Chi <sup>2</sup> | P     | Df       | Chi <sup>2</sup> | P     | Df    | Chi <sup>2</sup> | P     |
| Plant history       | 1                | 0.23             | 0.630 | 1       | 0.14             | 0.708 | 1        | 2.00             | 0.158 | 1     | 2.25             | 0.134 |
| Soil history        | 1                | 0.23             | 0.630 | 1       | 3.19             | 0.074 | 1        | 1.57             | 0.211 | 1     | 0.15             | 0.697 |
| Soil treatment      | 2                | 3.61             | 0.164 | 2       | 0.68             | 0.711 | 2        | 2.16             | 0.340 | 2     | 5.12             | 0.077 |

1243

2-species plot (N=6)

6-species plot (N=6)

Jena Experiment

Soil treatment

Global change treatment

Year

2002

2016 /  
2017

Seeds

Soil

Seeds

Soil

Home

Away-  
same\*

Away-  
different

Home

Away-  
same\*

Away-  
different

\*Species richness of seed and soil origin were the same, but material was collected in different research plots (different plant composition)

Control:

Drought:

N input:

Drought +  
N input:

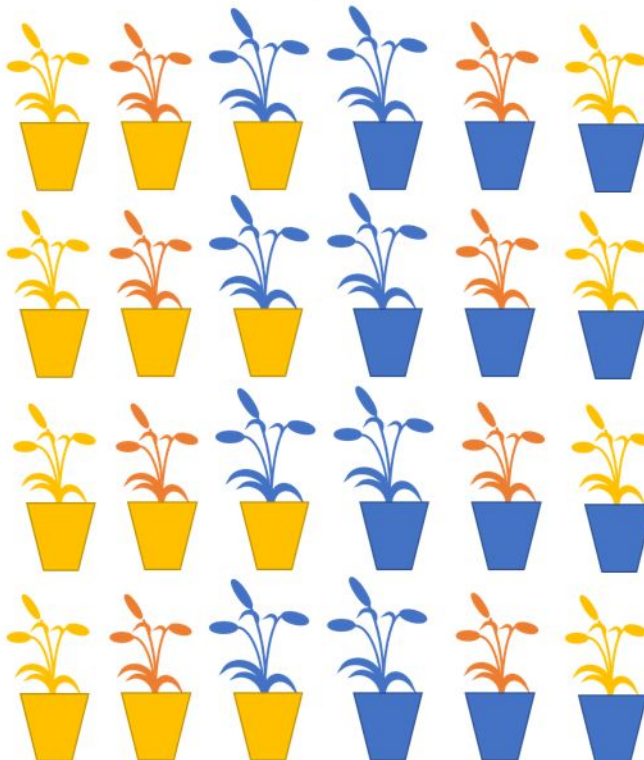

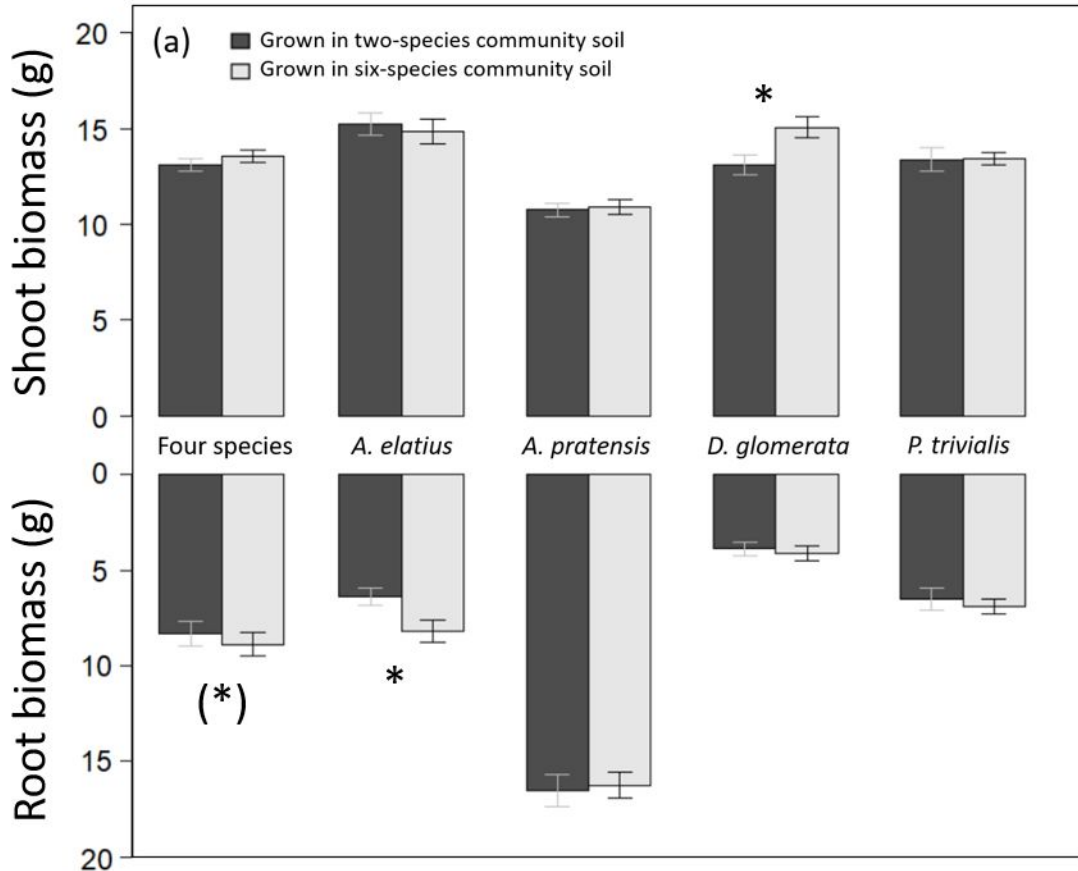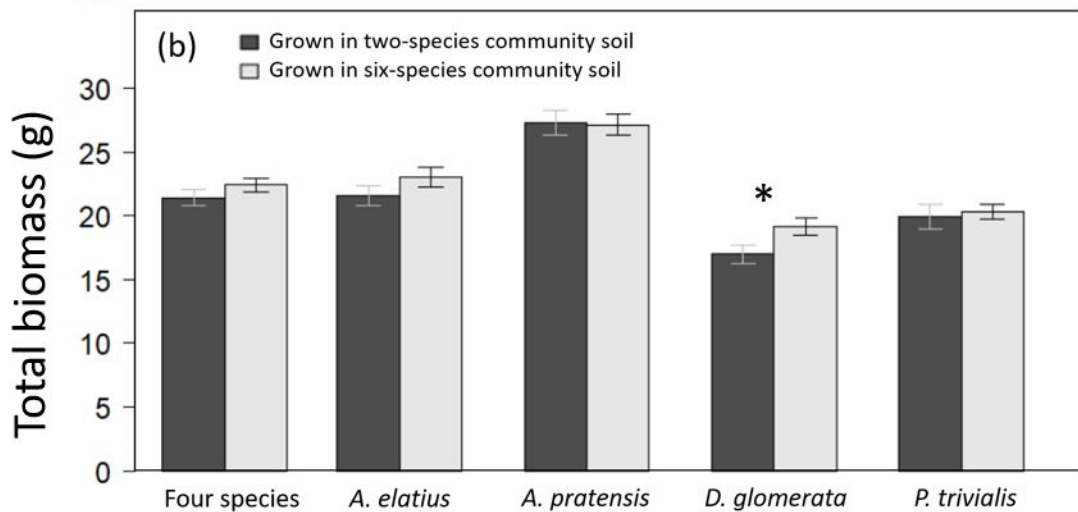

Legacy effect

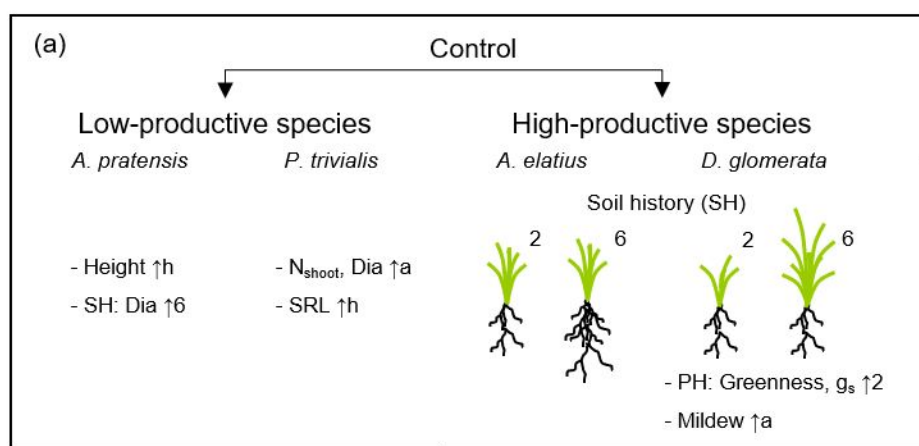

Legacy effect GC effect

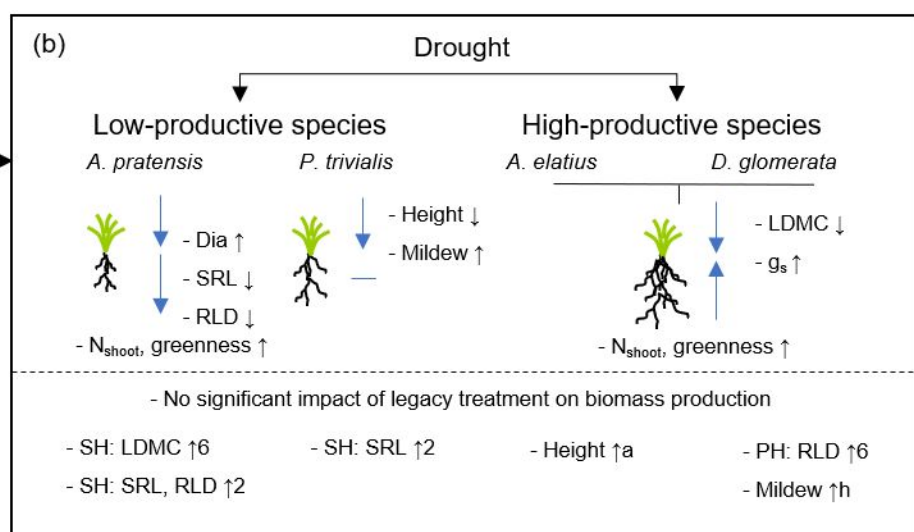

GC effect

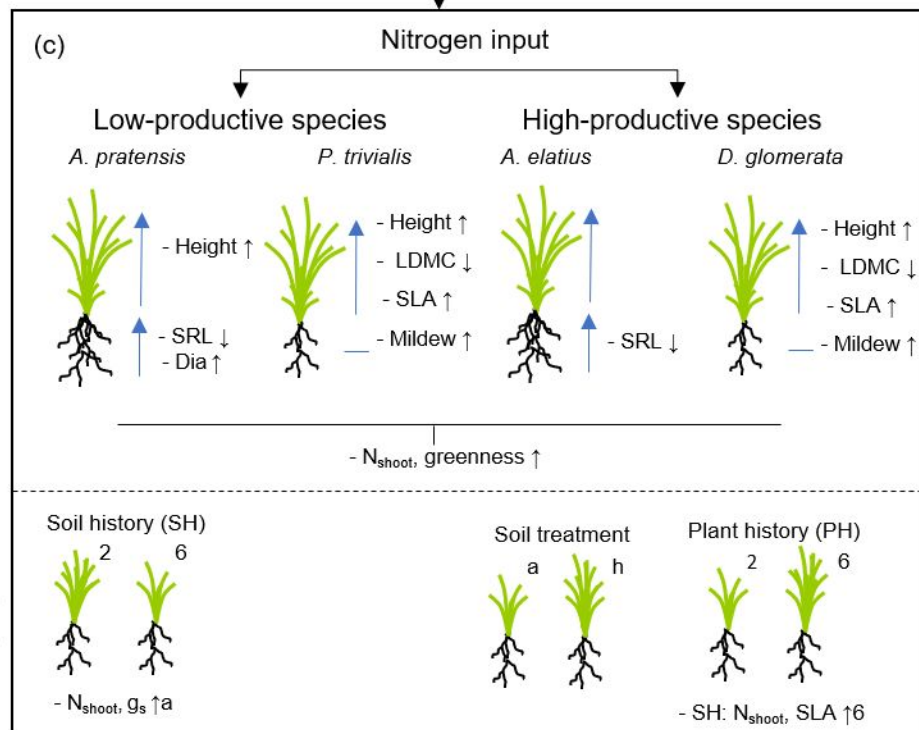

GC effect

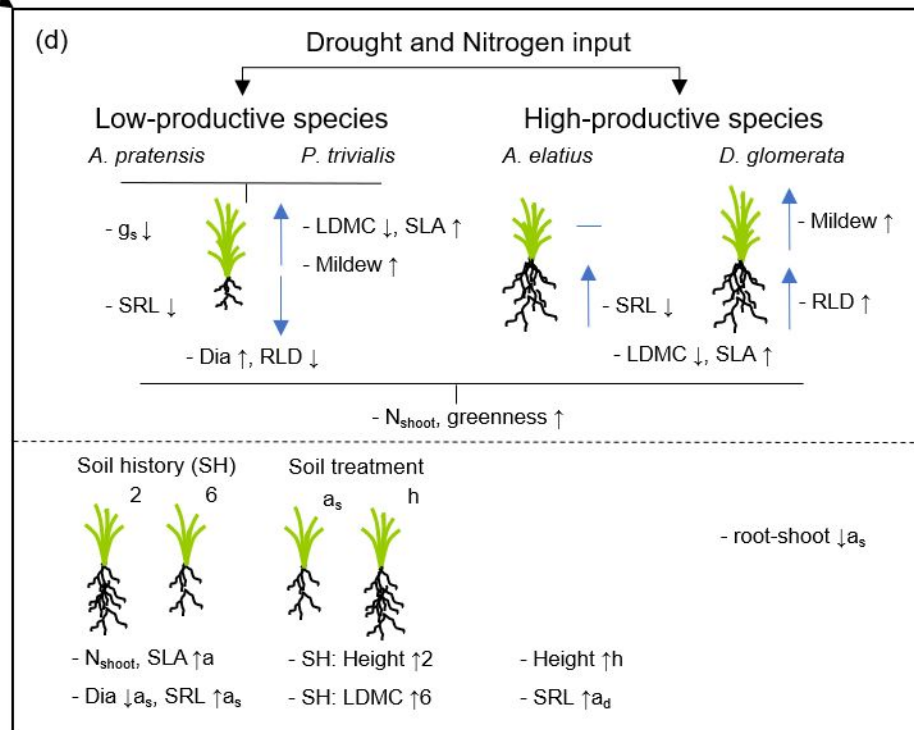

Legacy effect

## Drought

## Nitrogen input

## Drought and nitrogen input

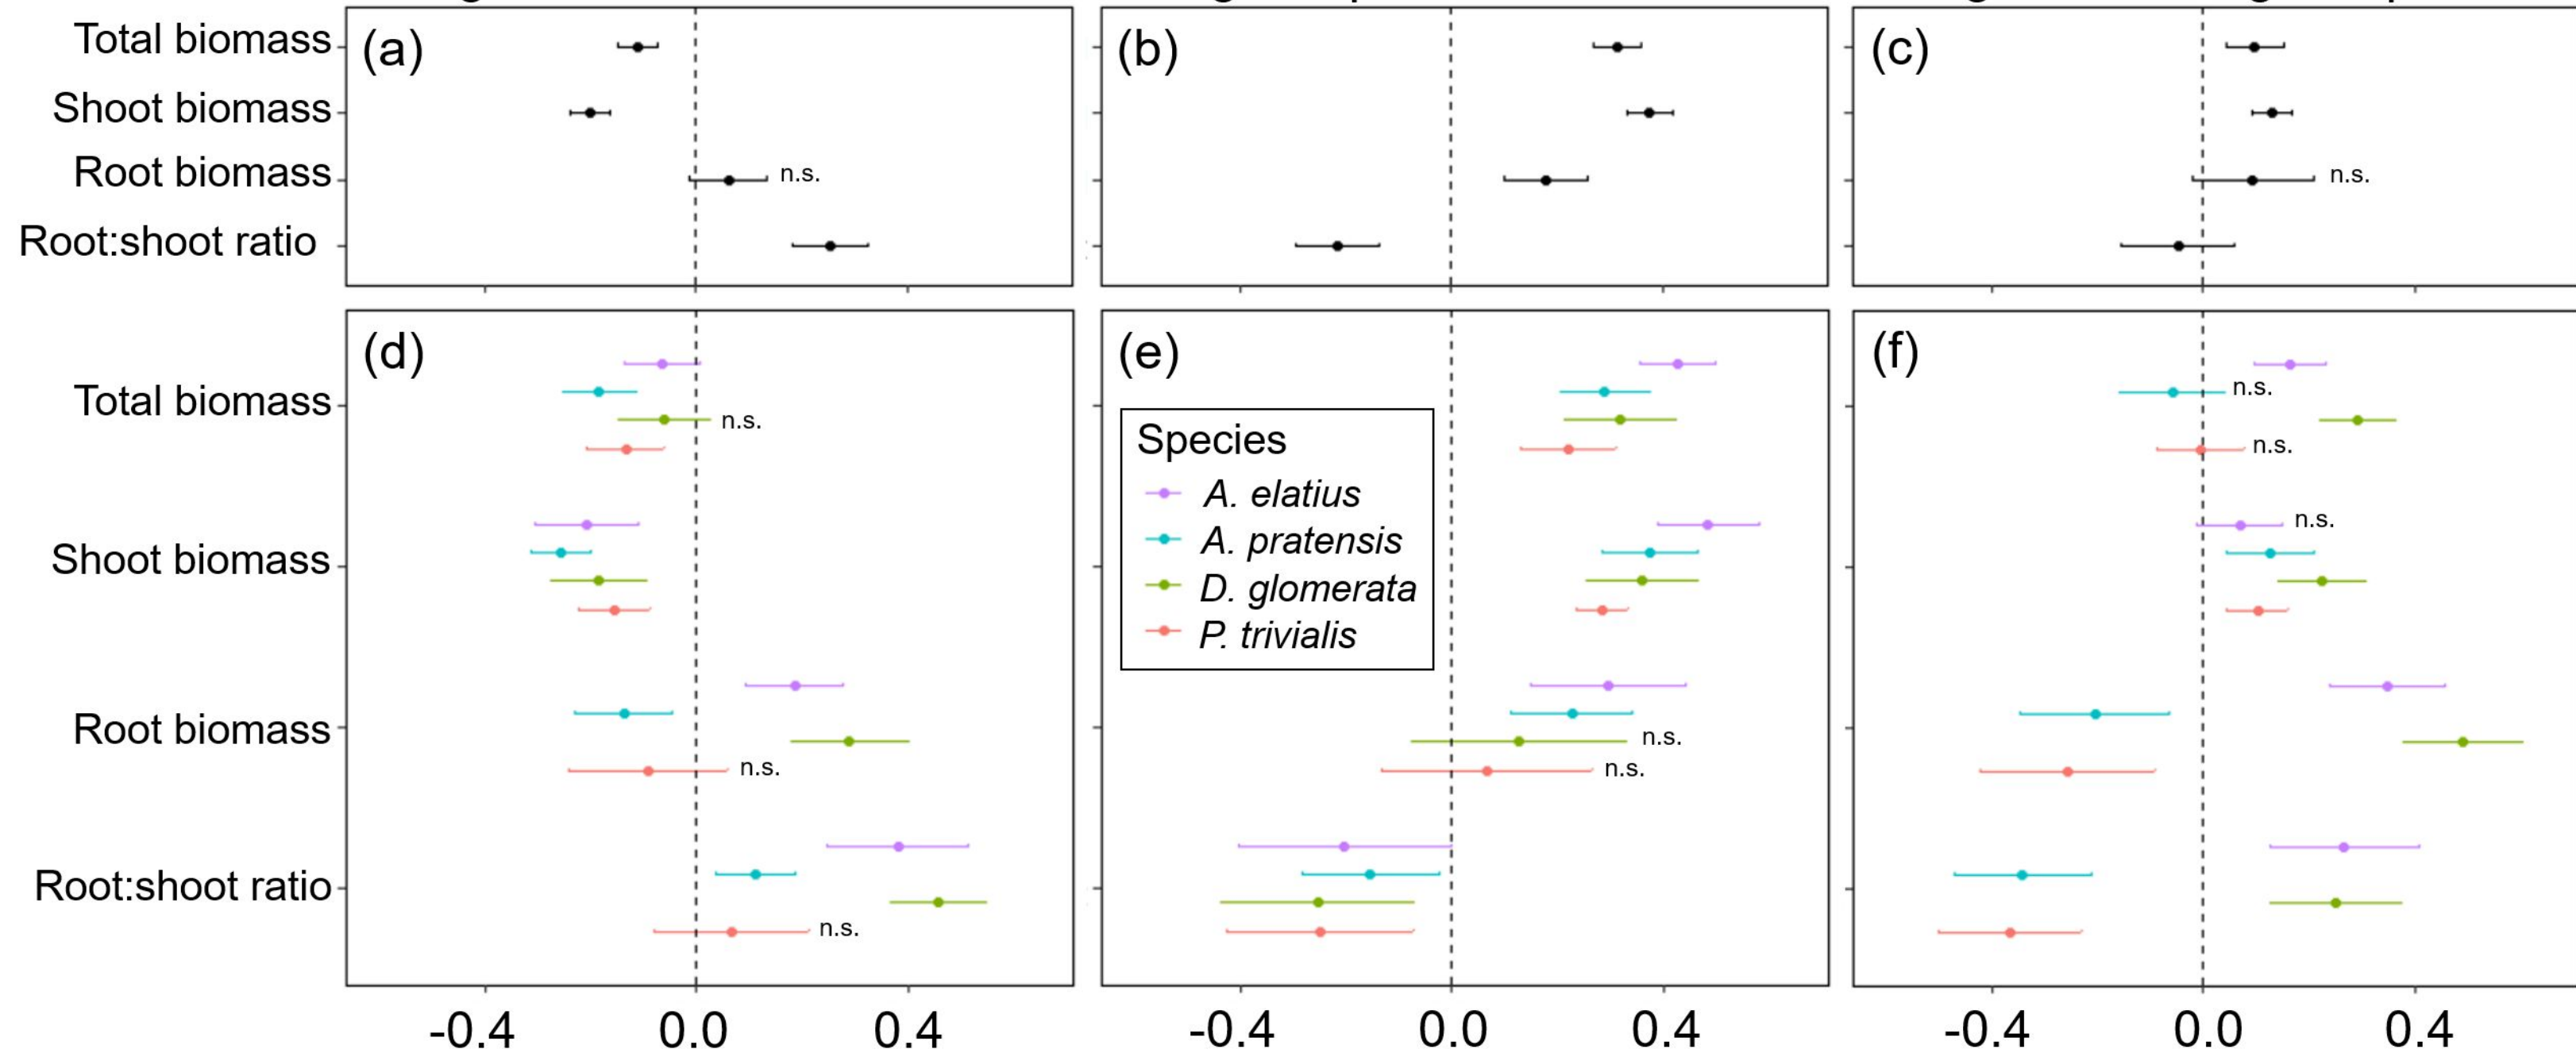



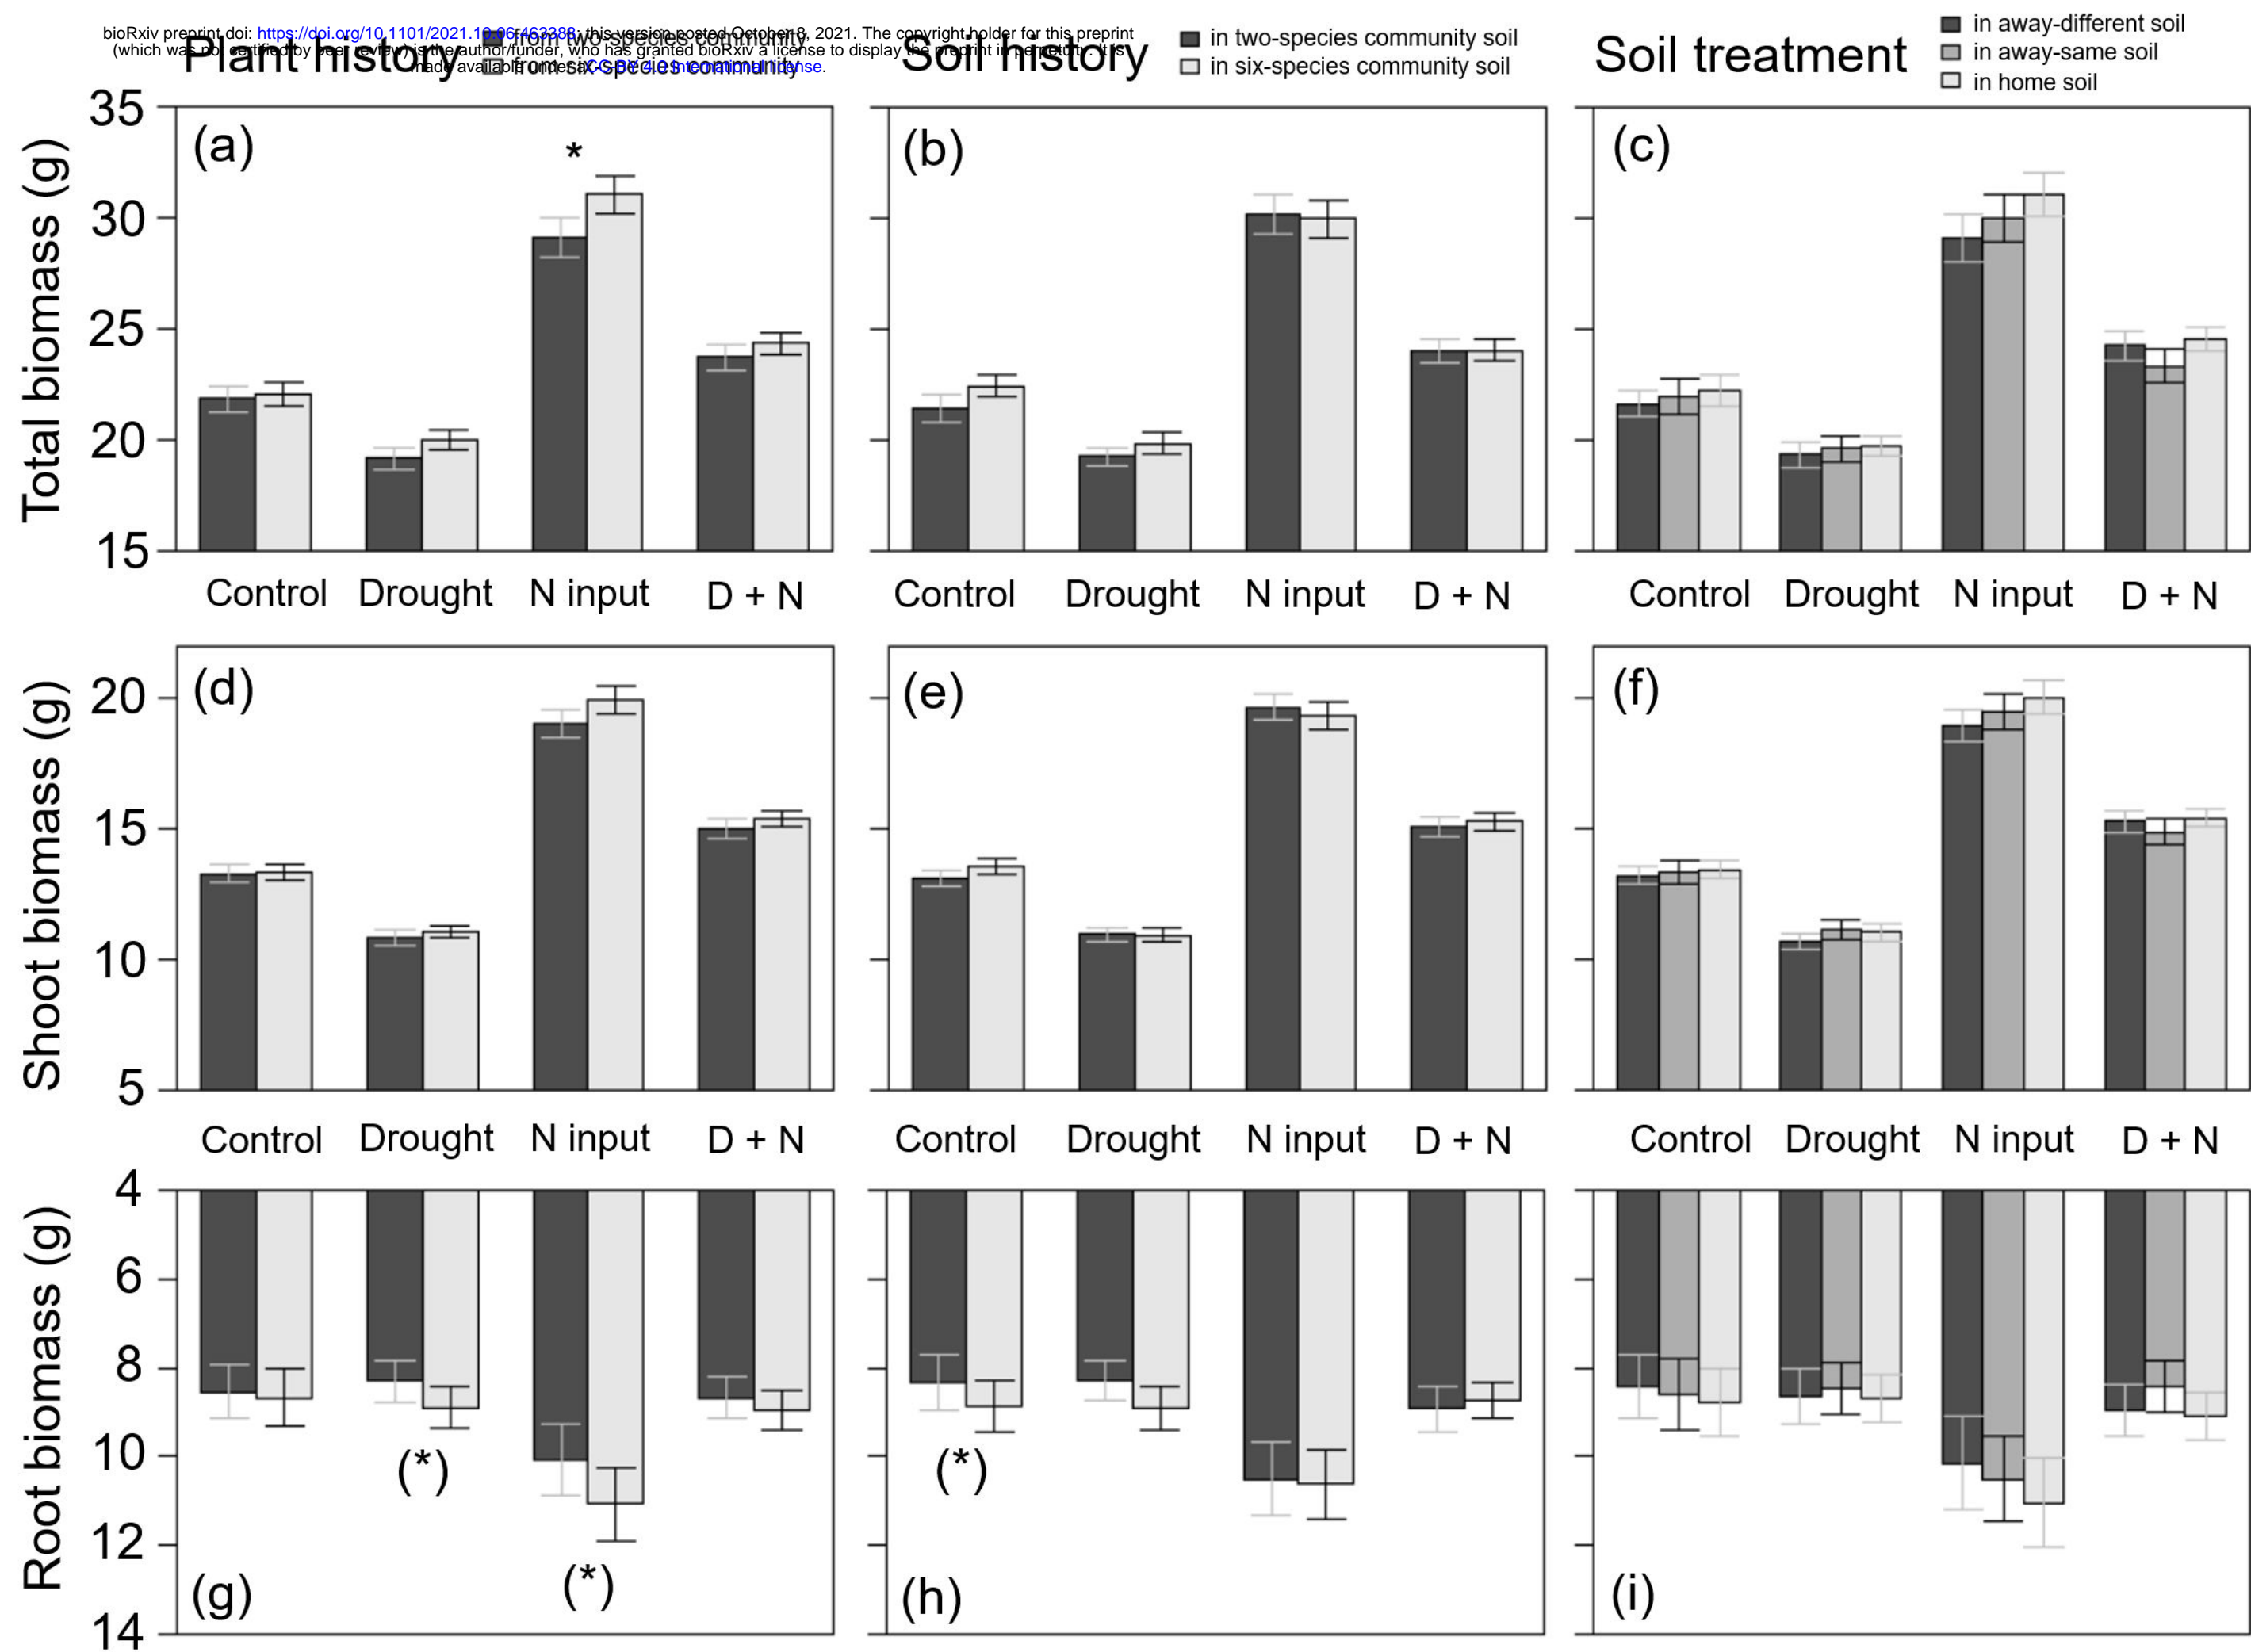

Source: https://www.biorxiv.org/content/biorxiv/early/2021/10/08/2021.10.06.463388.full.pdf
